# Supplementary material for: Copper-catalyzed propargylic [3+3] cycloaddition with 1H-pyrazol-5(4H)-ones: enantioselective access to optically active dihydropyrano[2,3-c]pyrazoles
Source: Royal Society of Chemistry journal article supplement (doi:10.1039/c8cc05706k), 2018-01-01

# **Copper-Catalyzed propargylic [3+3] Cycloaddition with 1*H*-pyrazol-5(4*H*)-ones: enantioselective access to optically active dihydropyrano [2, 3-*c*] pyrazoles**

Ling Li, Zhen-Ting Liu and Xiang-Ping Hu\*

*Dalian Institute of Chemical Physics, Chinese Academy of Sciences, Dalian 116023, China*

xiangping@dicp.ac.cn

## **Supporting Information**

|                                                                                                                             |             |
|-----------------------------------------------------------------------------------------------------------------------------|-------------|
| <b>General Information.....</b>                                                                                             | <b>S-2</b>  |
| <b>General Procedure for Cu-Catalyzed propargylic [3+3] Cycloaddition with<br/>1<i>H</i>-pyrazol-5(4<i>H</i>)-ones.....</b> | <b>S-2</b>  |
| <b>References.....</b>                                                                                                      | <b>S-23</b> |
| <b><sup>1</sup>H NMR and <sup>13</sup>C NMR Spectra.....</b>                                                                | <b>S-24</b> |

## General Information

All reactions were carried out under a nitrogen atmosphere. Solvents were purified by standard procedure before use. Commercial reagents were used without further purification. Flash chromatography was performed on silica gel 60 (40-63 $\mu$ m, 60Å). Thin layer chromatography (TLC) was performed on glass plates coated with silica gel 60 with F254 indicator. Proton nuclear magnetic resonance ( $^1\text{H}$  NMR) spectra were recorded on a Bruker 400 MHz spectrometer. Chemical shifts for protons are reported in parts per million downfield from tetramethylsilane and are referenced to residual protium in the NMR solvent ( $\text{CHCl}_3 = \delta$  7.28). Carbon nuclear magnetic resonance ( $^{13}\text{C}$  NMR) spectra were recorded on a Bruker 100 MHz spectrometer. Chemical shifts for carbon are reported in parts per million downfield from tetramethylsilane and are referenced to the carbon resonances of the solvent ( $\text{CDCl}_3 = \delta$  77.07). Data are represented as follows: chemical shift, multiplicity (br = broad, s = singlet, d = doublet, t = triplet, q = quartet, m = multiplet), coupling constants in Hertz (Hz), integration. Only the most important and relevant frequencies are reported. Enantiomeric ratios were determined by chiral HPLC with hexane and *i*-PrOH as solvents. 1*H*-pyrazol-5(4*H*)-ones **1**<sup>1</sup> and propargylic esters **2**<sup>2</sup> were prepared following the method from the literature.

## General Procedure for Copper-Catalyzed Asymmetric Formal [3+3] Cycloaddition of 3-Trimethylsilylpropargylic Esters with 1*H*-pyrazol-5(4*H*)-ones

A solution of  $\text{Cu}(\text{OAc})_2 \cdot \text{H}_2\text{O}$  (2.0 mg, 0.01 mmol) and (*S*)-**L**<sub>1</sub> (5.5 mg, 0.011 mmol) in 1 mL of anhydrous methanol placed in an oven-dried Schlenk flask was stirred at room temperature under a nitrogen atmosphere for 1 h. After lowering the reaction temperature to 10 °C, a solution of 1*H*-pyrazol-5(4*H*)-ones **1** (0.2 mmol), 3-trimethylsilylpropargylic esters **2** (0.24 mmol) and  $\text{Cs}_2\text{CO}_3$  (78.2 mg, 0.24 mmol) in 2 mL of anhydrous methanol was added. The mixture was stirred at 10 °C for 24 h. The reaction mixture was then concentrated under vacuum, and the residue was purified by silica gel chromatography to afford 1,4-dihydropyran[2,3-*c*]pyrazoles **3**.

**(*R*)-1,3,4-triphenyl-1,4-dihydropyrano[2,3-*c*]pyrazole (3aa).** Colorless oil was obtained in 87% yield after purification with column chromatography on silica gel (petroleum ether/ethyl acetate, 100/1). 94 % ee was determined by chiral HPLC (Chiralcel OJ-H, *n*-hexane/*i*-PrOH = 50/50, 0.8 mL/min, 254 nm, 40 °C):  $t_R$  (major) = 9.0 min,  $t_R$  (minor) = 17.4 min.  $^1\text{H}$  NMR (400 MHz,

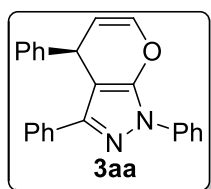

DMSO- $d_6$ )  $\delta$  7.87–7.84 (m, 2H), 7.62–7.55 (m, 4H), 7.41–7.37 (m, 1H), 7.29–7.21 (m, 7H), 7.16–7.10 (m, 1H), 6.87 (dd,  $J$  = 6.0, 1.5 Hz, 1H), 5.26 (dd,  $J$  = 6.0, 4.2 Hz, 1H), 5.12 (dd,  $J$  = 4.1, 1.5 Hz, 1H);  $^{13}\text{C}$  NMR (101 MHz, DMSO- $d_6$ )  $\delta$  147.5, 147.5, 145.1, 138.2, 138.0, 133.1, 129.9, 129.0, 128.7, 128.4, 128.1, 127.2, 127.1, 126.9, 121.3, 108.9, 97.6, 37.1. HRMS (ESI):  $m/z$  calcd for  $\text{C}_{24}\text{H}_{19}\text{N}_2\text{O}$  [ $\text{M} + \text{H}$ ] 351.1497, found 351.1500.

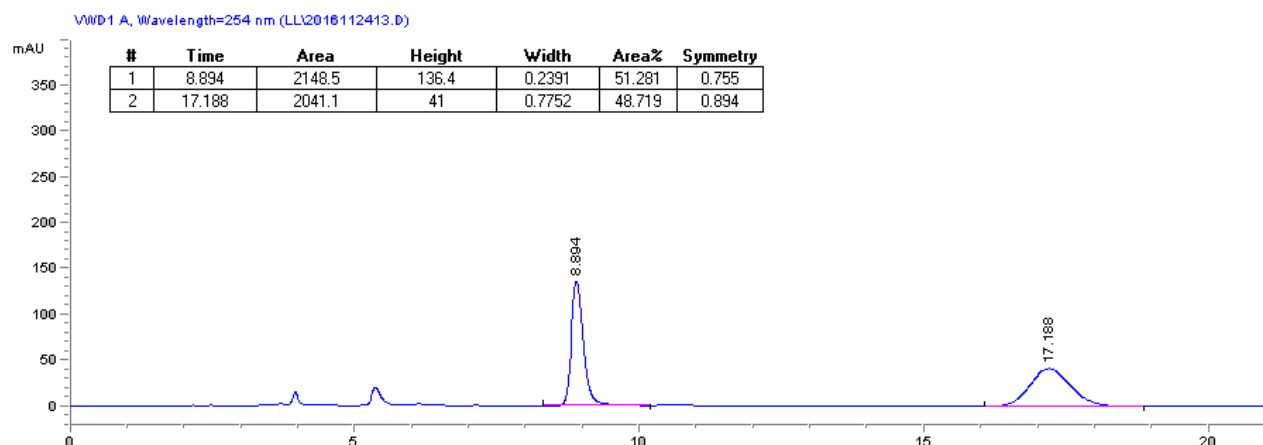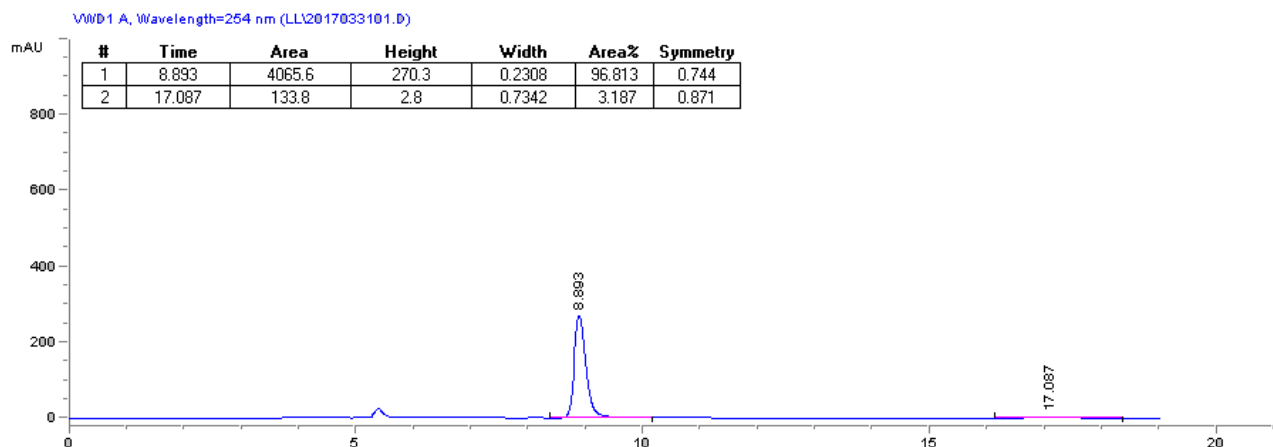

**(*R*)-3-(2-chlorophenyl)-1,4-diphenyl-1,4-dihydropyrano[2,3-*c*]pyrazole (3ba).** Pale red solid was obtained in

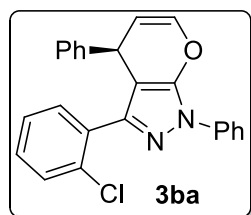

39% yield after purification with column chromatography on silica gel (petroleum ether/ethyl acetate, 100/1). M.p.: 126–128 °C. 71% ee was determined by chiral HPLC (Chiralcel OJ-H, *n*-hexane/*i*-PrOH = 50/50, 0.8 mL/min, 254 nm, 40 °C):  $t_R$  (minor) = 7.1 min,  $t_R$  (major) = 8.9 min.  $^1\text{H}$  NMR (400 MHz,  $\text{CDCl}_3$ )  $\delta$  7.87–7.84 (m, 2H), 7.47–7.43 (m, 2H), 7.32–7.24 (m, 2H), 7.18–6.96 (m, 8H), 6.69 (dd,  $J$  = 6.1, 1.8 Hz, 1H), 5.10 (dd,  $J$  = 6.1, 3.6 Hz, 1H), 4.82 (dd,  $J$  = 3.5, 1.8 Hz, 1H);  $^{13}\text{C}$  NMR (101 MHz,  $\text{CDCl}_3$ )  $\delta$  147.8, 145.8, 144.0, 138.6, 138.6, 133.6, 132.6, 131.6, 129.5, 129.1, 128.0, 127.8, 126.5, 126.4, 126.3, 120.9, 107.4, 100.8, 37.4. HRMS (ESI):  $m/z$  calcd for  $\text{C}_{24}\text{H}_{18}\text{ClN}_2\text{O}$  [ $\text{M} + \text{H}$ ] 385.1108, found 385.1113.

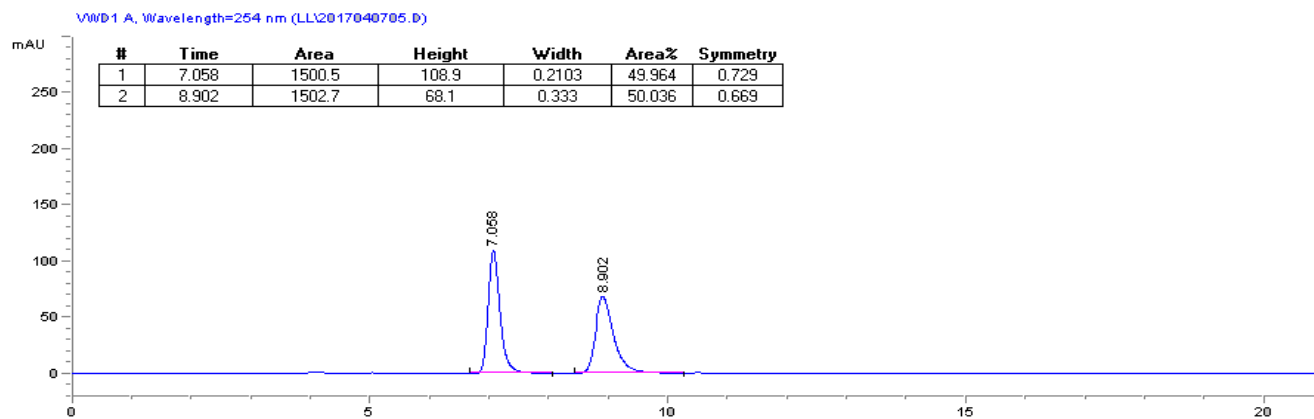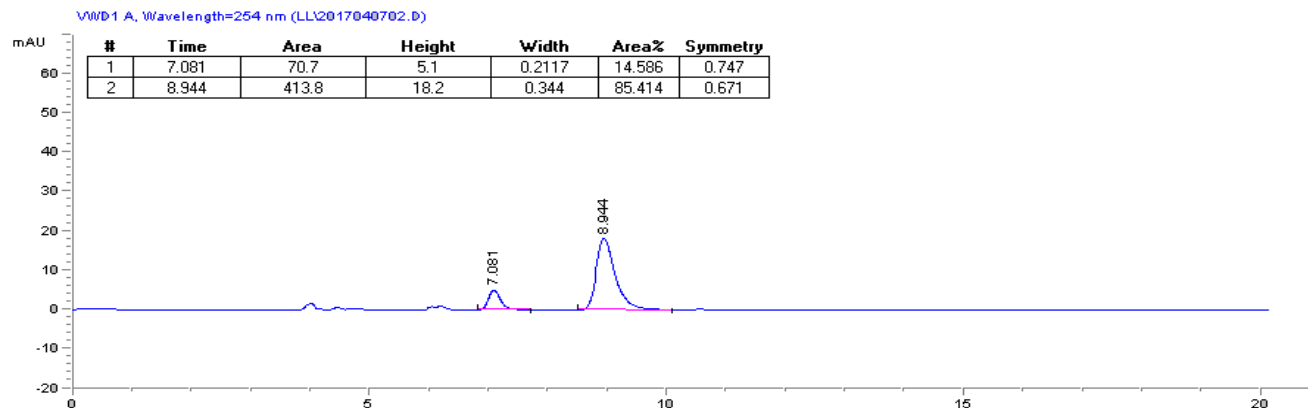

**(R)-3-(3-chlorophenyl)-1,4-diphenyl-1,4-dihydropyrano[2,3-*c*]pyrazole (3ca).** Colorless oil was obtained in

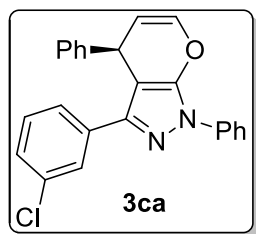

83% yield after purification with column chromatography on silica gel (petroleum ether/ethyl acetate, 100/1). 93% ee was determined by chiral HPLC (Chiralcel OJ-H, *n*-hexane/*i*-PrOH = 50/50, 0.8 mL/min, 254 nm, 40 °C):  $t_R$  (major) = 9.4 min,  $t_R$  (minor) = 12.3 min.  $^1\text{H}$  NMR (400 MHz, DMSO- $d_6$ )  $\delta$  7.71–7.68 (m, 2H), 7.42–7.38 (m, 4H), 7.25–7.21 (m, 1H), 7.12–7.08 (m, 6H), 7.00–6.96 (m, 1H), 6.70 (dd,  $J$  = 6.0, 1.5 Hz, 1H), 5.08 (dd,  $J$  = 6.0, 4.1 Hz, 1H), 4.95 (dd,  $J$  = 4.0, 1.5 Hz, 1H);  $^{13}\text{C}$  NMR (101 MHz, DMSO- $d_6$ )  $\delta$  147.6, 146.1, 144.9, 138.0, 135.0, 133.5, 130.6, 129.9, 129.0, 128.2, 127.4, 127.2, 126.5, 125.5, 121.5, 108.8, 98.0, 37.0. HRMS (ESI):  $m/z$  calcd for  $\text{C}_{24}\text{H}_{18}\text{ClN}_2\text{O}$  [ $\text{M} + \text{H}$ ] 385.1108, found 385.1110.

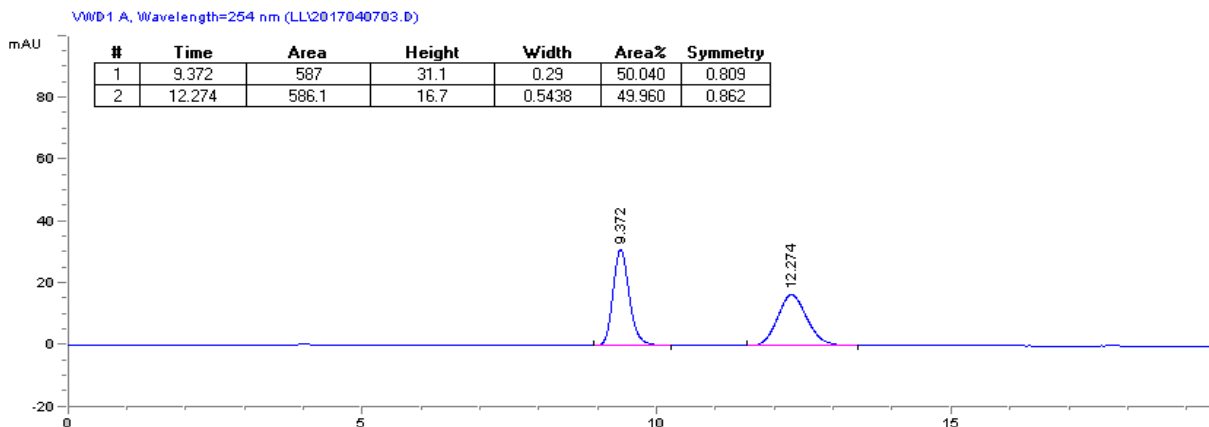

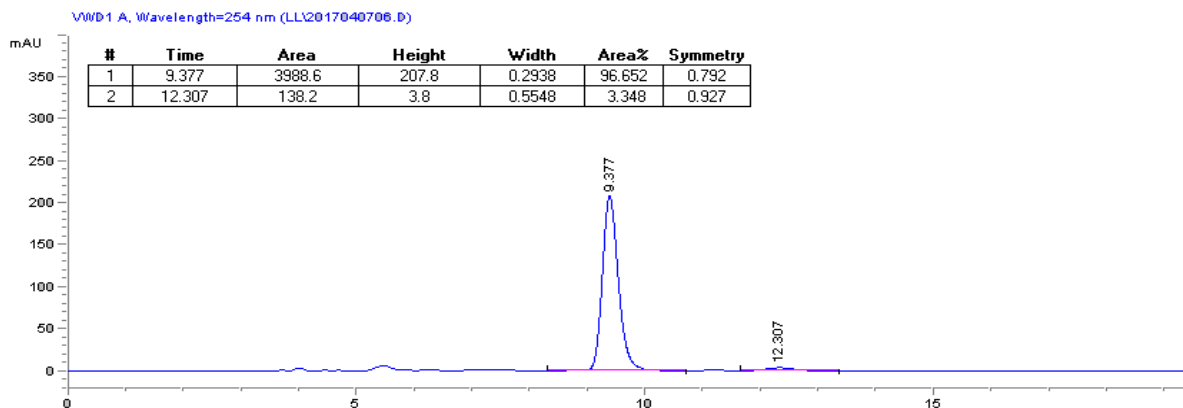

**(R)-3-(4-chlorophenyl)-1,4-diphenyl-1,4-dihydropyrano[2,3-*c*]pyrazole (3da).** Colorless oil was obtained in

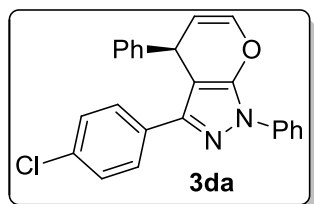

74% yield after purification with column chromatography on silica gel (petroleum ether/ethyl acetate, 100/1). 91% ee was determined by chiral HPLC (Chiralcel OJ-H, *n*-hexane/*i*-PrOH = 50/50, 0.8 mL/min, 254 nm, 40 °C):  $t_R$  (minor) = 9.8 min,  $t_R$  (major) = 11.6 min.  $^1\text{H}$  NMR (400 MHz,  $\text{CDCl}_3$ )  $\delta$  7.69–7.67 (m, 2H), 7.30–7.25 (m, 4H), 7.13–6.97 (m, 8H), 6.37 (dd,  $J$  = 6.0, 1.5 Hz, 1H), 4.96 (dd,  $J$  = 6.0, 4.1 Hz, 1H), 4.70 (dd,  $J$  = 4.0, 1.3 Hz, 1H);  $^{13}\text{C}$  NMR (101 MHz,  $\text{CDCl}_3$ )  $\delta$  147.5, 147.0, 144.5, 138.2, 137.3, 133.7, 131.6, 129.2, 128.8, 128.4, 128.2, 127.7, 127.0, 126.6, 121.1, 108.4, 97.3, 37.9. HRMS (ESI):  $m/z$  calcd for  $\text{C}_{24}\text{H}_{18}\text{ClN}_2\text{O}$  [ $\text{M} + \text{H}$ ] 385.1108, found 385.1108.

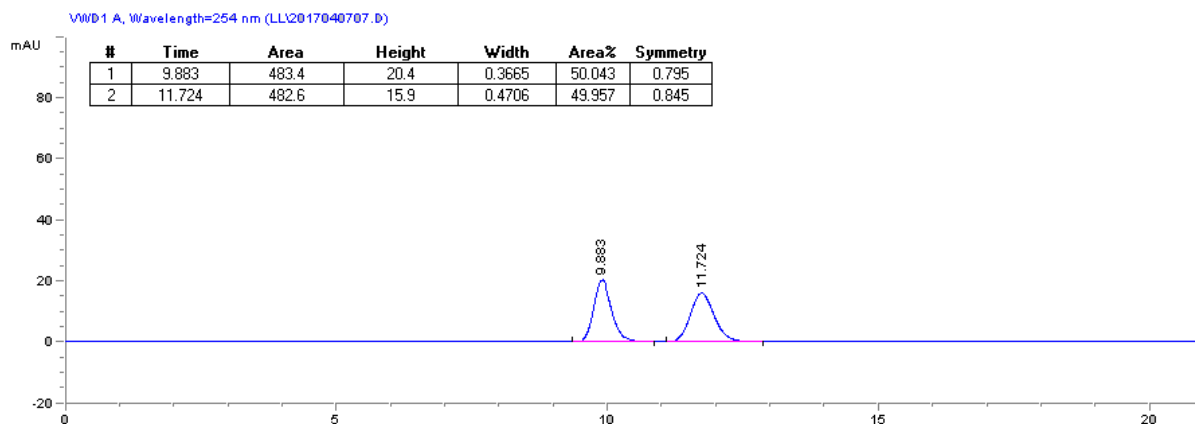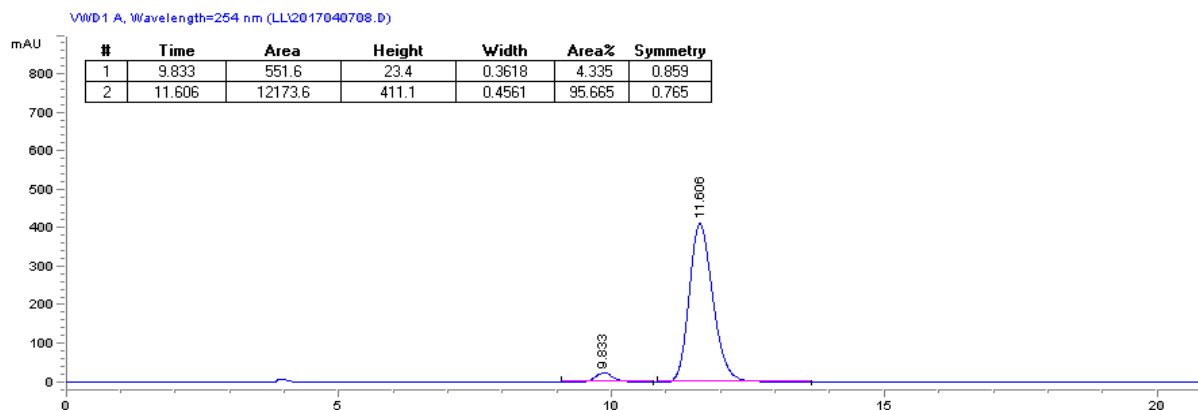

**(R)-3-(4-fluorophenyl)-1,4-diphenyl-1,4-dihydropyrano[2,3-*c*]pyrazole (3ea).** Colorless oil was obtained in

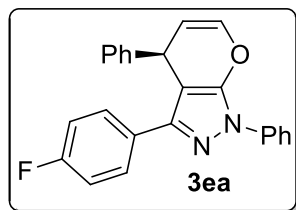

77% yield after purification with column chromatography on silica gel (petroleum ether/ethyl acetate, 100/1). 92% ee was determined by chiral HPLC (Chiralcel OD-H, *n*-hexane/*i*-PrOH = 98/2, 0.8 mL/min, 254 nm, 40 °C):  $t_R$  (minor) = 11.3 min,  $t_R$  (major) = 12.2 min.  $^1\text{H}$  NMR (400 MHz,  $\text{CDCl}_3$ )  $\delta$  7.89–7.87 (m, 2H), 7.50–7.45 (m, 4H), 7.31–7.14 (m, 6H), 6.91–6.87 (m, 2H), 6.55 (dd,  $J$  = 6.0, 1.4 Hz, 1H), 5.13 (dd,  $J$  = 6.0, 4.1 Hz, 1H), 4.87 (dd,  $J$  = 3.8, 1.1 Hz, 1H);  $^{13}\text{C}$  NMR (101 MHz,  $\text{CDCl}_3$ )  $\delta$  162.5 (d,  $J$  = 247.1 Hz), 147.4, 147.4, 144.6, 138.3, 137.3, 129.3 (d,  $J$  = 3.2 Hz), 129.2, 128.8 (d,  $J$  = 8.1 Hz), 128.8, 127.7, 127.0, 126.5, 121.0, 115.1 (d,  $J$  = 21.5 Hz), 108.4, 97.3, 37.9. HRMS (ESI):  $m/z$  calcd for  $\text{C}_{24}\text{H}_{18}\text{FN}_2\text{O}$  [ $\text{M} + \text{H}$ ] 369.1403, found 369.1404.

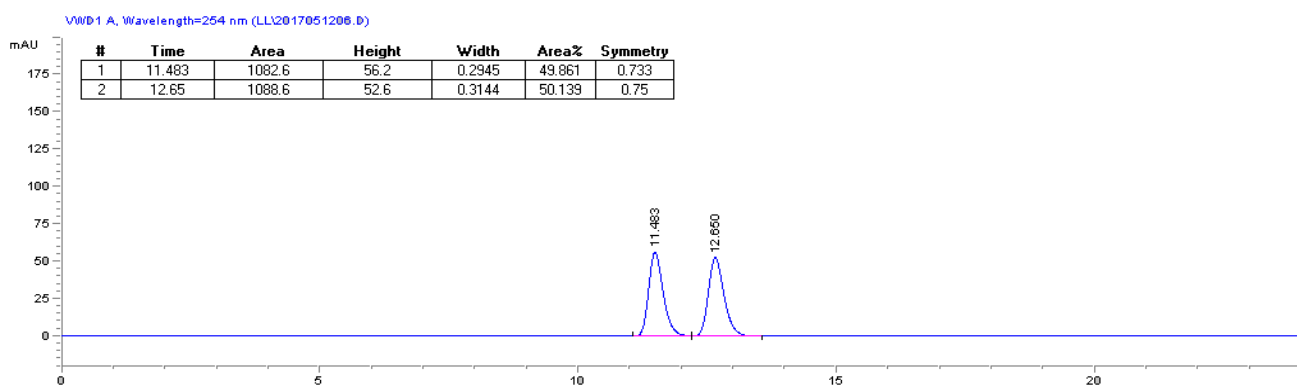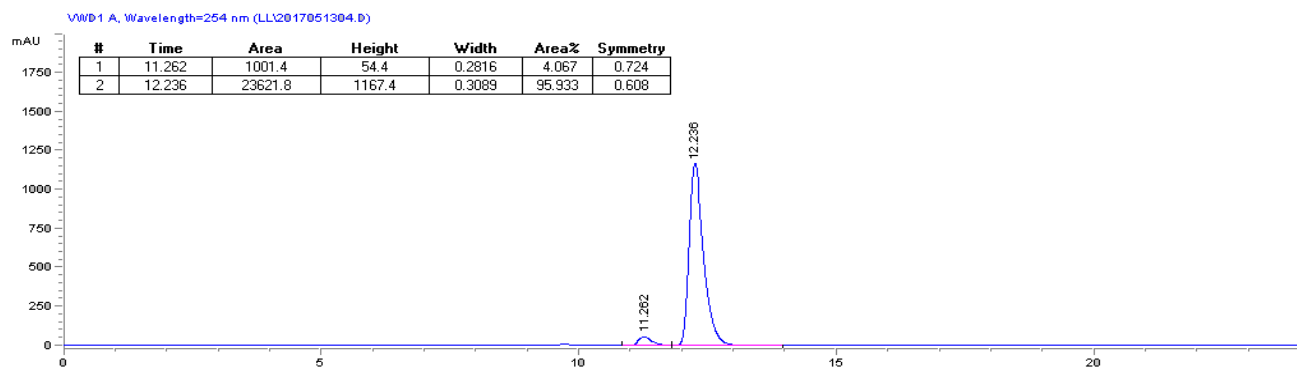

**(R)-3-(4-bromophenyl)-1,4-diphenyl-1,4-dihydropyrano[2,3-*c*]pyrazole (3fa).** Colorless oil was obtained in

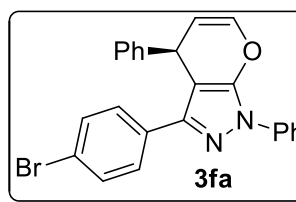

72% yield after purification with column chromatography on silica gel (petroleum ether/ethyl acetate, 100/1). 92% ee was determined by chiral HPLC (Chiralcel OJ-H, *n*-hexane/*i*-PrOH = 50/50, 0.8 mL/min, 254 nm, 40 °C):  $t_R$  (minor) = 10.2 min,  $t_R$  (major) = 11.7 min.  $^1\text{H}$  NMR (400 MHz,  $\text{DMSO}-d_6$ )  $\delta$  7.69–7.67 (m, 2H), 7.41–7.38 (m, 4H), 7.29–7.21 (m, 3H), 7.08–7.06 (m, 4H), 6.99–6.94 (m, 1H), 6.70 (dd,  $J$  = 6.0,

1.2 Hz, 1H), 5.09 (dd,  $J = 5.9, 4.2$  Hz, 1H), 4.95–4.94 (m, 1H);  $^{13}\text{C}$  NMR (101 MHz,  $\text{DMSO}-d_6$ )  $\delta$  147.6, 146.4, 144.8, 138.0, 132.3, 131.6, 129.9, 129.0, 128.9, 128.2, 127.3, 127.2, 121.7, 121.4, 108.8, 97.8, 37.0. HRMS (ESI):  $m/z$  calcd for  $\text{C}_{24}\text{H}_{18}\text{BrN}_2\text{O}$  [ $\text{M} + \text{H}$ ] 429.0603, found 429.0602.

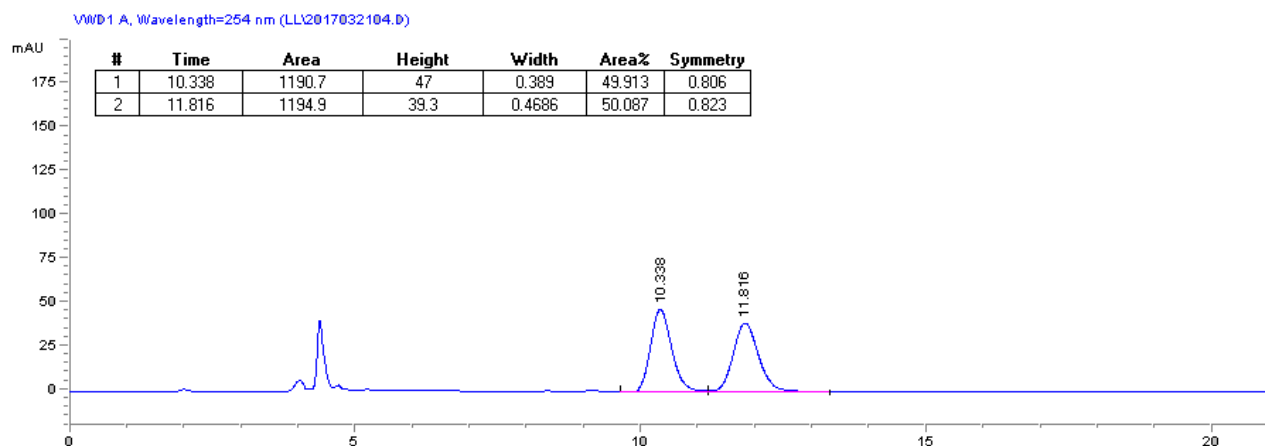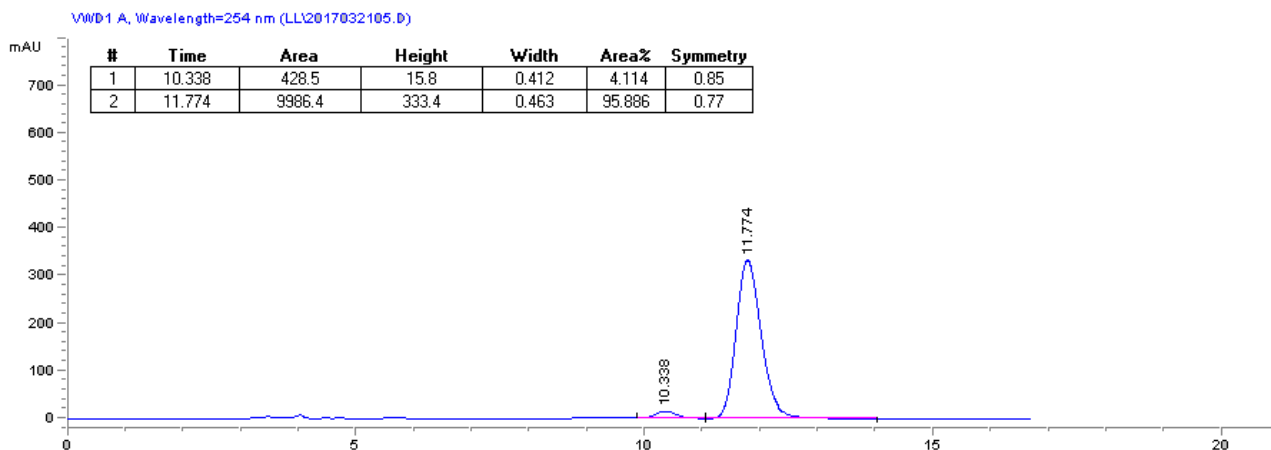

**(*R*)-1,4-diphenyl-3-(*p*-tolyl)-1,4-dihydropyrano[2,3-*c*]pyrazole (3ga).** Colorless oil was obtained in 92%

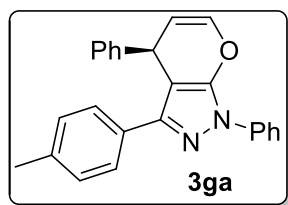

yield after purification with column chromatography on silica gel (petroleum ether/ethyl acetate, 100/1). 93% ee was determined by chiral HPLC (Chiralcel OJ-H, *n*-hexane/*i*-PrOH = 90/10, 0.8 ml/min, 254 nm, 40 °C):  $t_R$  (major) = 16.0 min,  $t_R$  (minor) = 18.2 min.  $^1\text{H}$  NMR (400 MHz,  $\text{CDCl}_3$ )  $\delta$  7.90–7.88 (m, 2H), 7.48–7.42 (m, 4H), 7.32–7.21 (m, 5H), 7.17–7.13 (m, 1H), 7.03–7.01 (m, 2H), 6.55 (dd,  $J = 6.0, 1.5$  Hz, 1H), 5.14 (dd,  $J = 6.0, 4.1$  Hz, 1H), 4.91 (dd,  $J = 4.1, 1.4$  Hz, 1H), 2.26 (s, 3H);  $^{13}\text{C}$  NMR (101 MHz,  $\text{CDCl}_3$ )  $\delta$  148.2, 147.4, 144.9, 138.4, 137.6, 137.3, 130.3, 129.1, 128.9, 128.7, 127.7, 126.9, 126.8, 126.3, 121.1, 108.5, 97.1, 38.0, 21.3. HRMS (ESI):  $m/z$  calcd for  $\text{C}_{25}\text{H}_{21}\text{N}_2\text{O}$  [ $\text{M} + \text{H}$ ] 365.1654, found 365.1650.

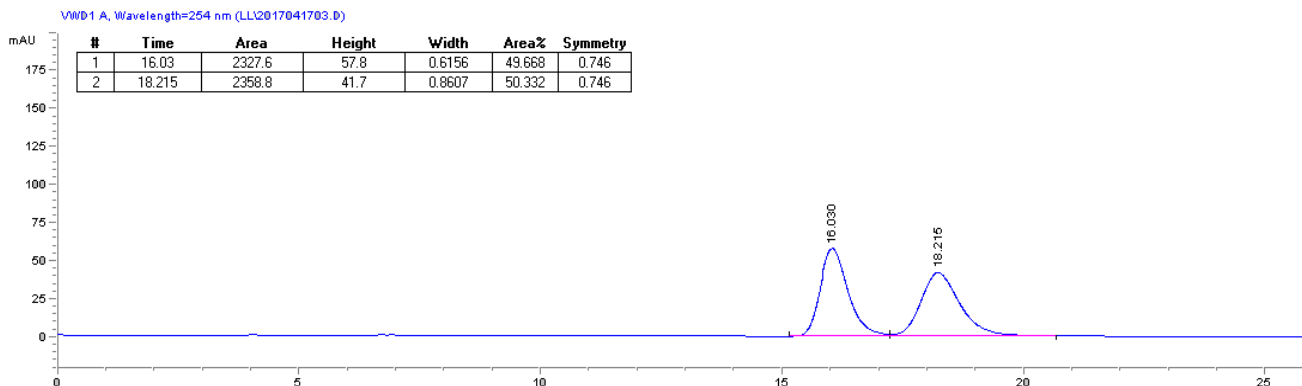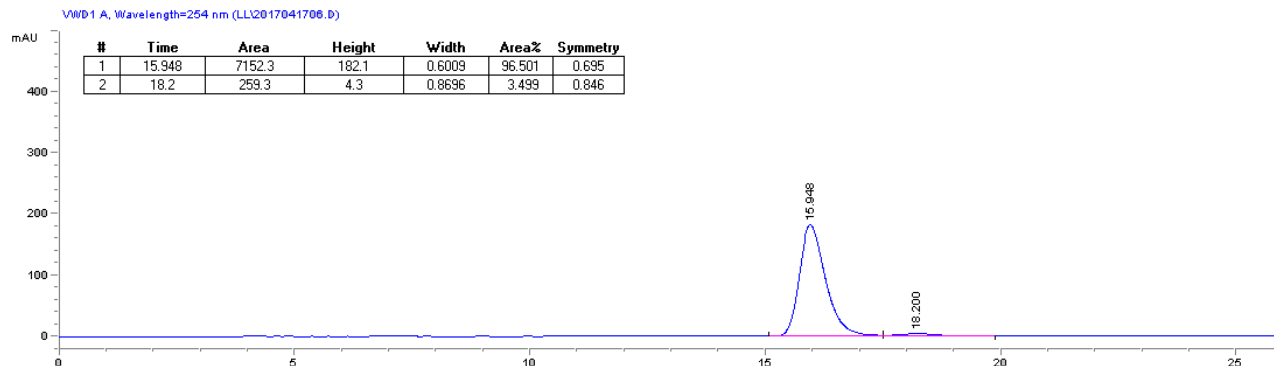

**(R)-3-(4-methoxyphenyl)-1,4-diphenyl-1,4-dihydropyrano[2,3-*c*]pyrazole (3ha).** Colorless oil was obtained

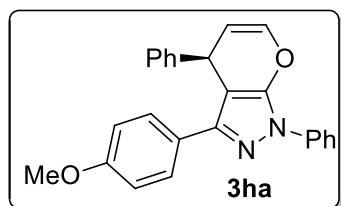

in 97% yield after purification with column chromatography on silica gel (petroleum ether/ethyl acetate, 50/1). 94% ee was determined by chiral HPLC (Chiralcel AS-H, *n*-hexane/*i*-PrOH = 95/5, 0.8 mL/min, 254 nm, 40 °C):  $t_R$  (major) = 8.8 min,  $t_R$  (minor) = 13.7 min.  $^1\text{H}$  NMR (400 MHz,  $\text{CDCl}_3$ )  $\delta$  7.89–7.87 (m, 2H), 7.48–7.44 (m, 4H), 7.30–7.21 (m, 5H), 7.19–7.14 (m, 1H), 6.75–6.72 (m, 2H),

6.56 (dd,  $J$  = 6.0, 1.5 Hz, 1H), 5.15 (dd,  $J$  = 6.0, 4.1 Hz, 1H), 4.89 (dd,  $J$  = 4.0, 1.4 Hz, 1H), 3.74 (s, 3H);  $^{13}\text{C}$  NMR (101 MHz,  $\text{CDCl}_3$ )  $\delta$  159.3, 148.0, 147.4, 144.8, 138.4, 137.3, 129.1, 128.8, 128.3, 127.7, 126.8, 126.2, 125.8, 121.0, 113.6, 108.5, 96.9, 55.2, 38.0. HRMS (ESI):  $m/z$  calcd for  $\text{C}_{25}\text{H}_{21}\text{N}_2\text{O}_2$  [ $\text{M} + \text{H}$ ] 381.1603, found 381.1610.

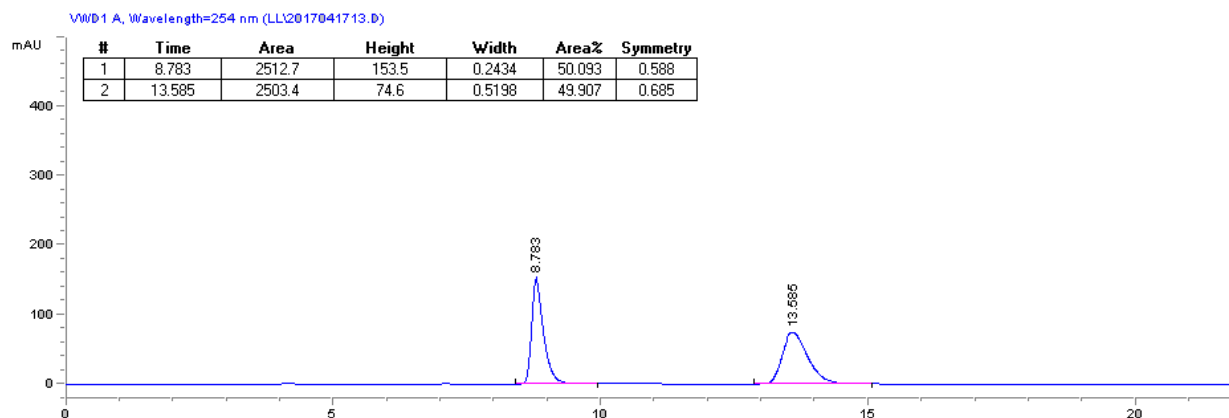



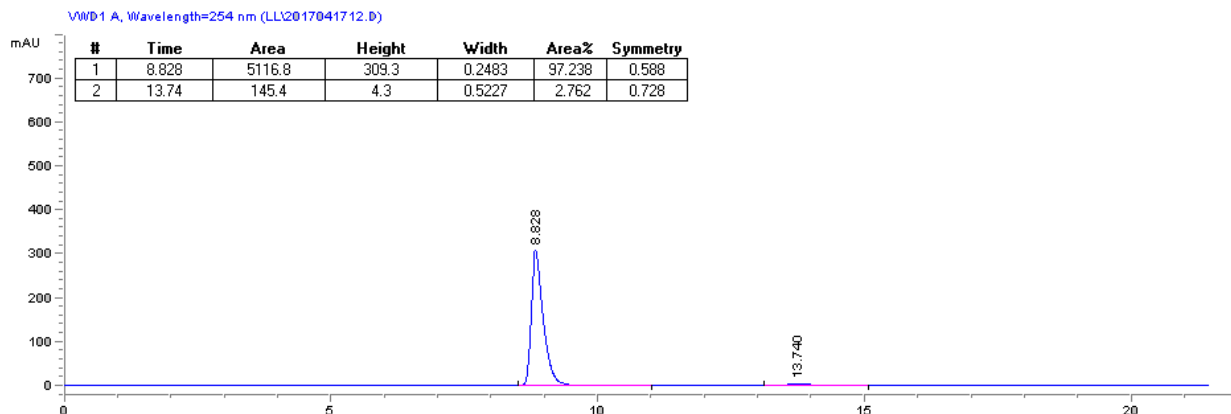

**(R)-3-(naphthalen-2-yl)-1,4-diphenyl-1,4-dihydropyrano[2,3-c]pyrazole (3ia).** Colorless oil was obtained in

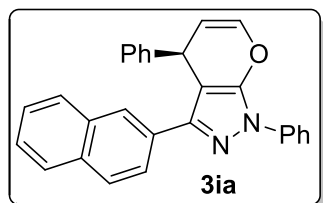

96% yield after purification with column chromatography on silica gel (petroleum ether/ethyl acetate, 100/1). M.p.: 92-94 °C. 95% ee was determined by chiral HPLC

(Chiralcel OJ-H, *n*-hexane/*i*-PrOH = 50/50, 0.8 mL/min, 254 nm, 40 °C):  $t_R$  (minor) = 14.1 min,  $t_R$  (major) = 19.6 min.  $^1\text{H}$  NMR (400 MHz,  $\text{CDCl}_3$ )  $\delta$  7.94–7.87 (m, 3H),

7.79–7.71 (m, 3H), 7.58–7.47 (m, 3H), 7.41–7.37 (m, 2H), 7.33–7.22 (m, 5H),

7.18–7.14 (m, 1H), 6.57 (dd,  $J$  = 6.0, 1.4 Hz, 1H), 5.18 (dd,  $J$  = 6.0, 4.1 Hz, 1H), 5.00 (dd,  $J$  = 3.9, 1.3 Hz, 1H);

$^{13}\text{C}$  NMR (101 MHz,  $\text{CDCl}_3$ )  $\delta$  148.0, 147.6, 145.0, 138.4, 137.3, 133.1, 132.9, 130.6, 129.2, 128.9, 128.2, 127.9, 127.8, 127.6, 127.0, 126.5, 126.4, 126.0, 124.9, 121.2, 108.6, 97.6, 38.2. HRMS (ESI):  $m/z$  calcd for  $\text{C}_{28}\text{H}_{21}\text{N}_2\text{O}$  [ $\text{M} + \text{H}$ ] 401.1654, found 401.1658.

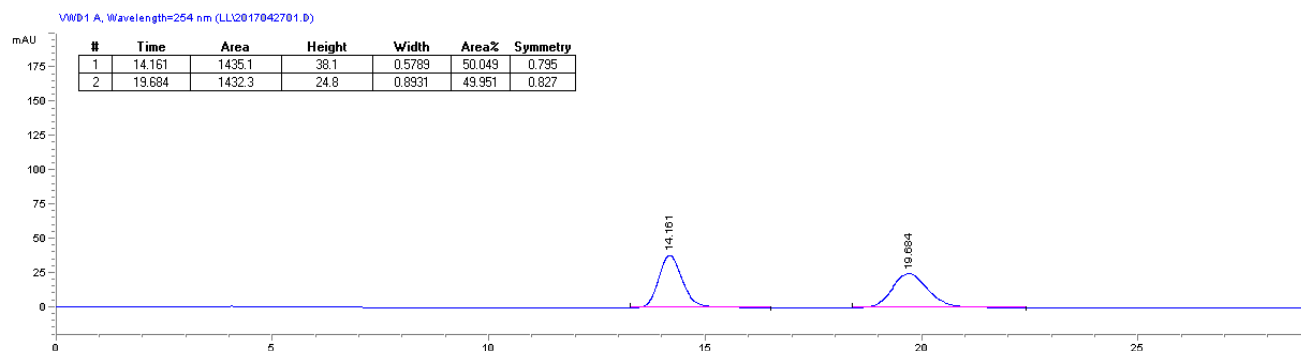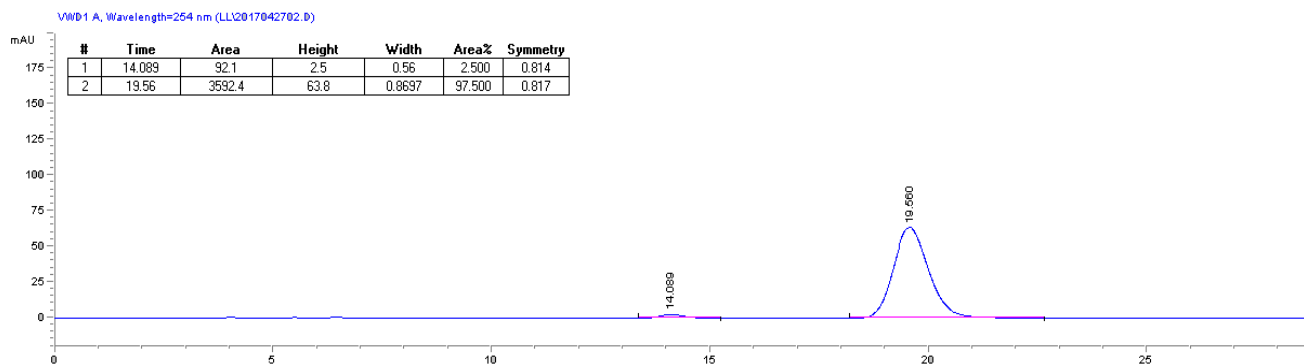

**(R)-1,4-diphenyl-3-(thiophen-2-yl)-1,4-dihydropyrano[2,3-*c*]pyrazole (3ja).** Colorless oil was obtained in 72%

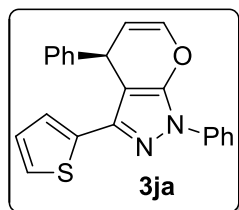

yield after purification with column chromatography on silica gel (petroleum ether/ethyl acetate, 100/1). 91% ee was determined by chiral HPLC (Chiralcel OJ-H, *n*-hexane/*i*-PrOH = 50/50, 0.8 mL/min, 254 nm, 40 °C):  $t_R$  (major) = 10.9 min,  $t_R$  (minor) = 16.5 min.  $^1\text{H}$  NMR (400 MHz,  $\text{CDCl}_3$ )  $\delta$  7.88–7.86 (m, 2H), 7.48–7.44 (m, 2H), 7.30–7.12 (m, 7H), 6.83–6.79 (m, 2H), 6.52 (dd,  $J$  = 6.1, 1.5 Hz, 1H), 5.15 (dd,  $J$  = 6.0, 4.1 Hz, 1H), 4.85 (dd,  $J$  = 4.0, 1.3 Hz, 1H);  $^{13}\text{C}$  NMR (101 MHz,  $\text{CDCl}_3$ )  $\delta$  147.6, 144.4, 143.7, 138.1,

137.2, 135.8, 129.2, 128.9, 127.7, 127.2, 127.0, 126.5, 125.4, 125.0, 121.1, 108.6, 96.6, 37.5. HRMS (ESI):  $m/z$  calcd for  $\text{C}_{22}\text{H}_{17}\text{N}_2\text{OS}$  [ $\text{M} + \text{H}$ ] 357.1062, found 357.1068.

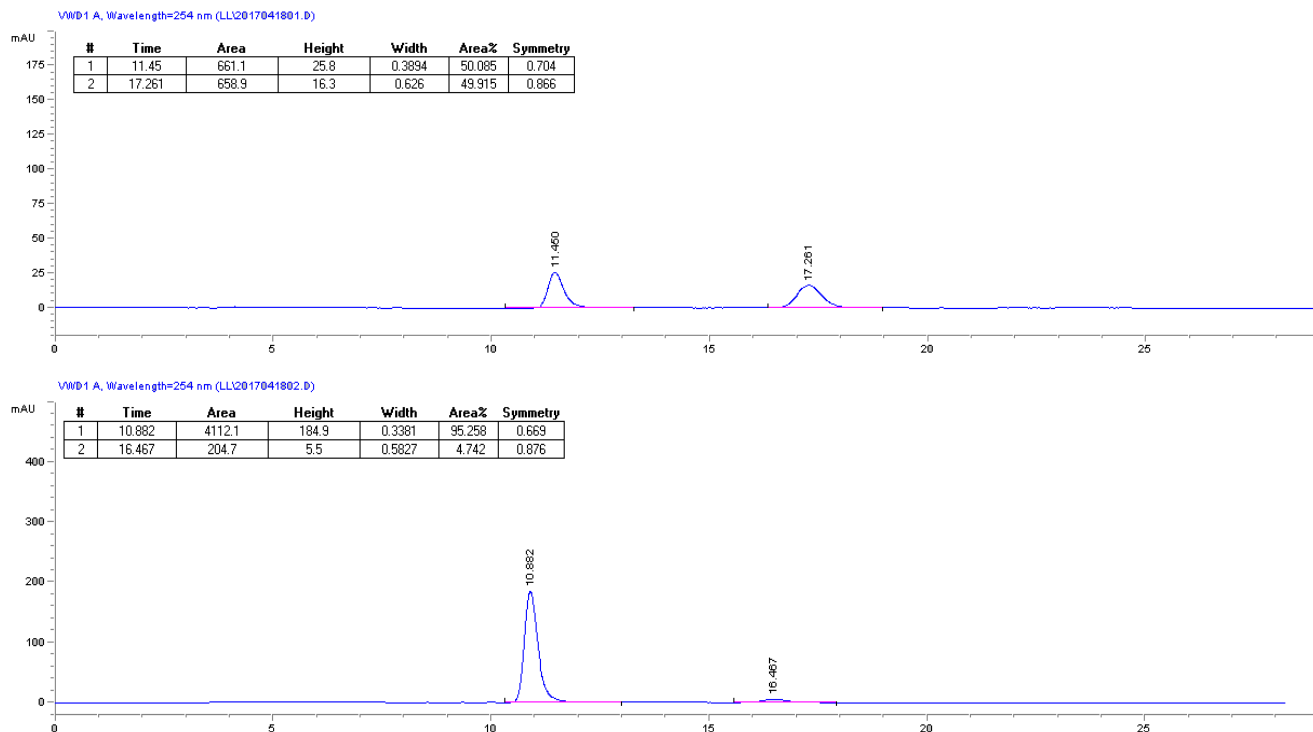

**(R)-3,4-diphenyl-1-(p-tolyl)-1,4-dihydropyrano[2,3-*c*]pyrazole (3ka).** Pale red solid was obtained in 89% yield after purification with column chromatography on silica gel (petroleum ether /ethyl acetate, 100/1). M.p.:

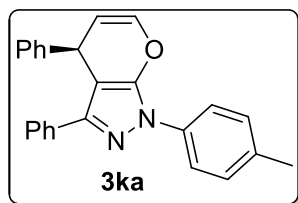

122–124 °C. 94% ee was determined by chiral HPLC (Chiralcel OJ-H, *n*-hexane/*i*-PrOH = 50/50, 0.8 mL/min, 254 nm, 40 °C):  $t_R$  (major) = 9.2 min,  $t_R$  (minor) = 18.9 min.  $^1\text{H}$  NMR (400 MHz,  $\text{CDCl}_3$ )  $\delta$  7.76–7.74 (m, 2H), 7.54–7.51 (m, 2H), 7.28–7.17 (m, 9H), 7.16–7.12 (m, 1H), 6.55 (dd,  $J$  = 6.0, 1.4 Hz, 1H), 5.14 (dd,  $J$  = 6.0, 4.1 Hz, 1H), 4.92 (dd,  $J$  = 4.0, 1.3 Hz, 1H), 2.39 (s, 3H);  $^{13}\text{C}$  NMR (101 MHz,

$\text{CDCl}_3$ )  $\delta$  147.9, 147.3, 144.8, 137.4, 136.2, 135.9, 133.2, 129.7, 128.7, 128.1, 127.8, 127.7, 127.0, 126.8, 121.2, 108.5, 97.2, 38.0, 21.1. HRMS (ESI):  $m/z$  calcd for  $\text{C}_{25}\text{H}_{21}\text{N}_2\text{O}$  [ $\text{M} + \text{H}$ ] 365.1654, found 365.1656.

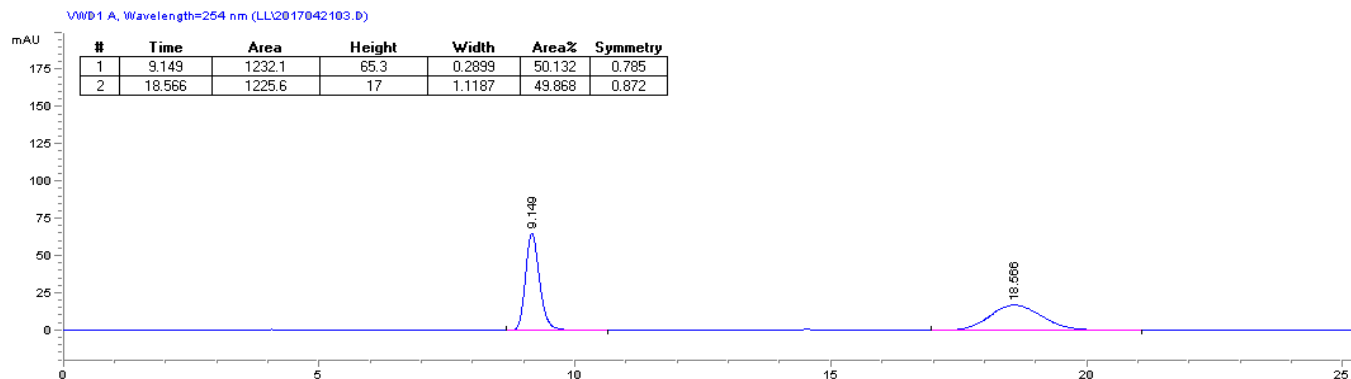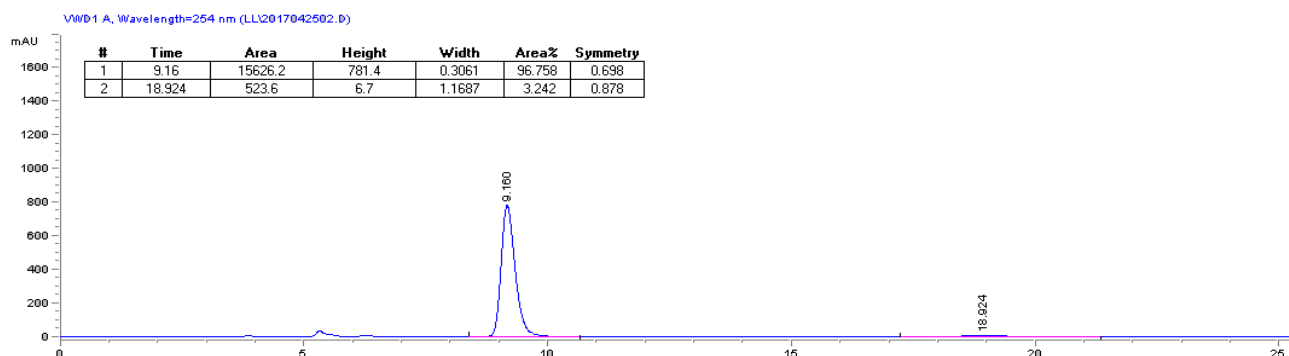

**(R)-1-(4-methoxyphenyl)-3,4-diphenyl-1,4-dihydropyrano[2,3-c]pyrazole (3la).** Colorless oil was obtained

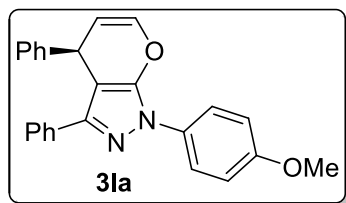

in 86% yield after purification with column chromatography on silica gel (petroleum ether/ethyl acetate, 50/1). M.p.: 76–78 °C. 91% ee was determined by chiral HPLC (Chiralcel AD-H, *n*-hexane/*i*-PrOH = 90/10, 0.8 mL/min, 254 nm, 40 °C):  $t_R$  (major) = 9.5 min,  $t_R$  (minor) = 10.6 min.  $^1\text{H}$  NMR (400 MHz,  $\text{CDCl}_3$ )  $\delta$  7.77–7.74 (m, 2H), 7.53–7.51 (m, 2H), 7.24–7.14 (m, 8H), 7.01–6.98 (m, 2H),

6.54 (dd,  $J$  = 6.0, 1.4 Hz, 1H), 5.13 (dd,  $J$  = 6.0, 4.1 Hz, 1H), 4.92 (dd,  $J$  = 4.0, 1.3 Hz, 1H), 3.83 (s, 3H);  $^{13}\text{C}$  NMR (101 MHz,  $\text{CDCl}_3$ )  $\delta$  158.2, 147.7, 147.1, 144.8, 137.4, 133.3, 131.6, 128.7, 128.1, 127.8, 127.7, 127.0, 126.8, 122.9, 114.3, 108.5, 97.0, 55.6, 38.0. HRMS (ESI):  $m/z$  calcd for  $\text{C}_{25}\text{H}_{21}\text{N}_2\text{O}_2$  [ $\text{M} + \text{H}$ ] 381.1603, found 381.1605.

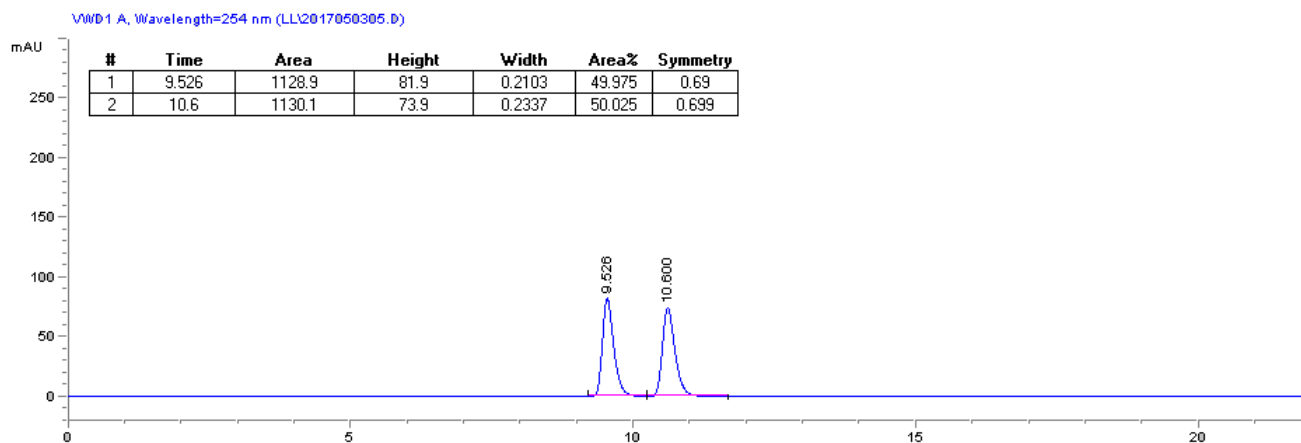

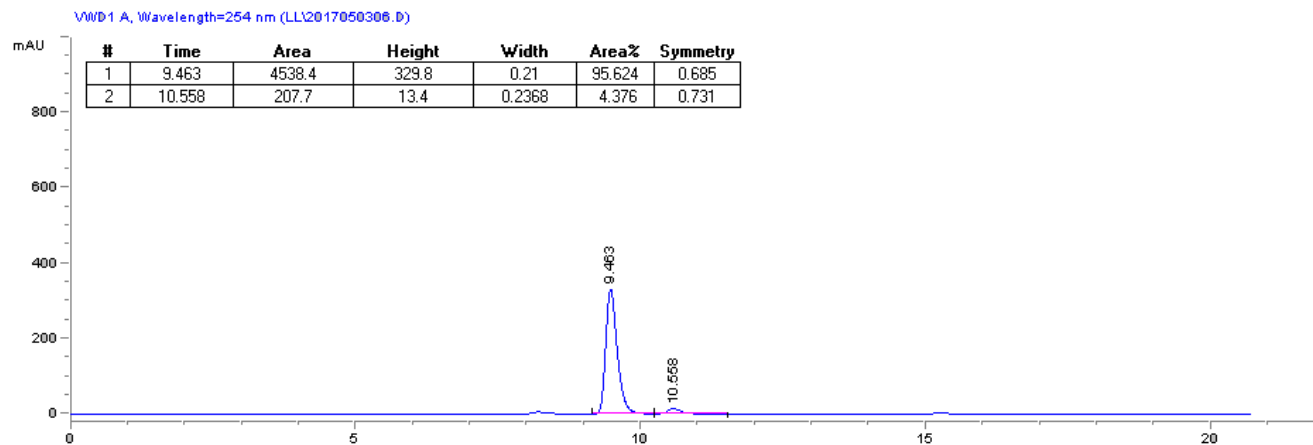

**(R)-1-(4-bromophenyl)-3,4-diphenyl-1,4-dihydropyrano[2,3-c]pyrazole (3ma).** Colorless oil was obtained in

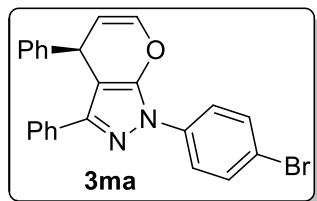

81% yield after purification with column chromatography on silica gel (petroleum ether/ethyl acetate, 100/1). M.p.: 102-104 °C. 93% ee was determined by chiral HPLC (Chiralcel OJ-H, *n*-hexane/*i*-PrOH = 50/50, 0.8 mL/min, 254 nm, 40 °C):  $t_R$  (major) = 14.1 min,  $t_R$  (minor) = 18.8 min.  $^1\text{H}$  NMR (400 MHz,  $\text{CDCl}_3$ )  $\delta$  7.83–7.80 (m, 2H), 7.60–7.57 (m, 2H), 7.52–7.50 (m, 2H), 7.26–7.13 (m, 8H), 6.57 (dd,  $J$  =

6.0, 1.4 Hz, 1H), 5.16 (dd,  $J$  = 6.0, 4.1 Hz, 1H), 4.91 (dd,  $J$  = 4.0, 1.2 Hz, 1H);  $^{13}\text{C}$  NMR (101 MHz,  $\text{CDCl}_3$ )  $\delta$  148.6, 147.4, 144.5, 137.5, 137.3, 132.9, 132.2, 128.7, 128.2, 128.0, 127.7, 127.0, 126.9, 122.2, 119.5, 108.6, 97.7, 37.8. HRMS (ESI):  $m/z$  calcd for  $\text{C}_{24}\text{H}_{18}\text{BrN}_2\text{O}$  [ $\text{M} + \text{H}$ ] 429.0603, found 429.0607.

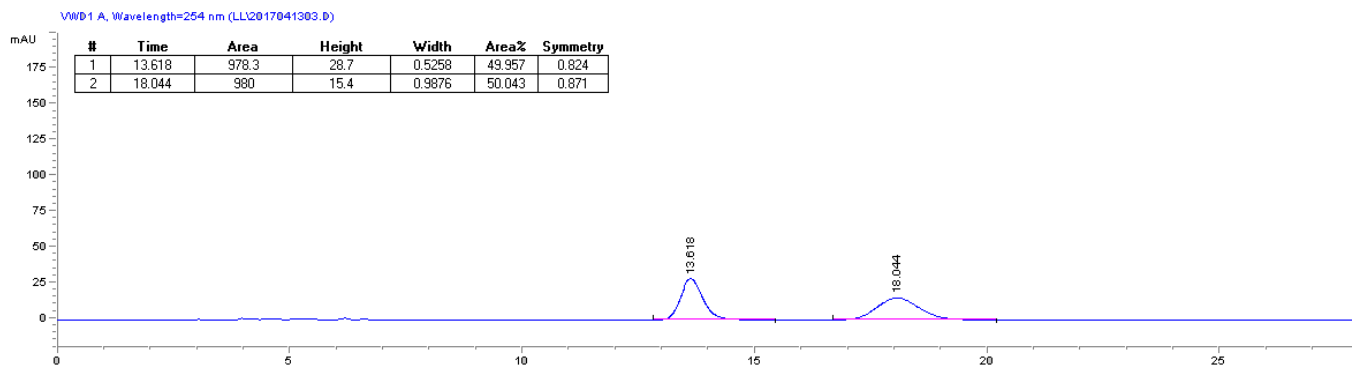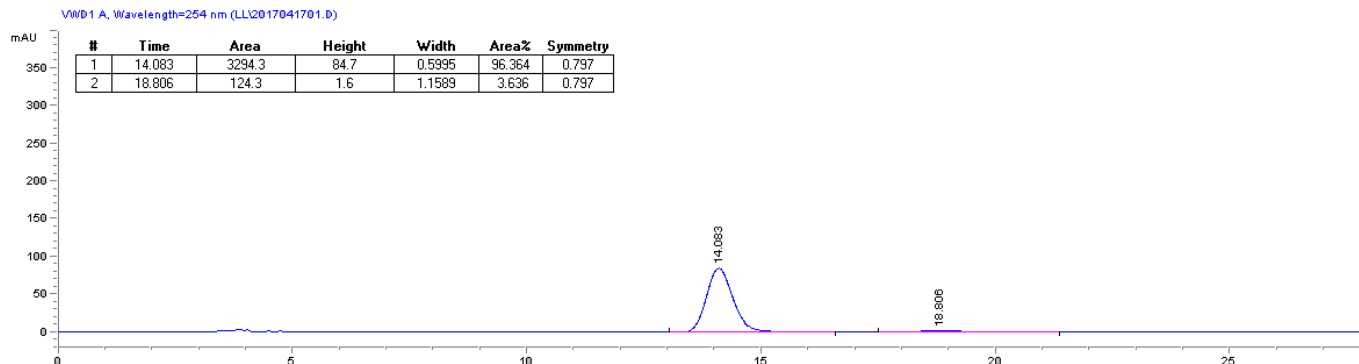

**(R)-1-cyclohexyl-3,4-diphenyl-1,4-dihydropyrano[2,3-*c*]pyrazole (3na).** Colorless oil was obtained in 83%

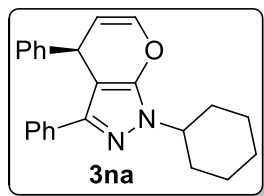

yield after purification with column chromatography on silica gel (petroleum ether/ethyl acetate, 100/1). 96% ee was determined by chiral HPLC (Chiralcel OD-H, *n*-hexane/*i*-PrOH = 98/2, 0.8 mL/min, 254 nm, 40 °C):  $t_R$  (minor) = 6.5 min,  $t_R$  (major) = 8.5 min.  $^1\text{H}$  NMR (400 MHz,  $\text{CDCl}_3$ ):  $\delta$  7.44–7.41 (m, 2H), 7.23–7.09 (m, 8H), 6.48

(dd,  $J$  = 6.1, 1.5 Hz, 1H), 5.06 (dd,  $J$  = 6.1, 4.1 Hz, 1H), 4.84 (dd,  $J$  = 4.0, 1.4 Hz, 1H), 4.22–4.14 (m, 1H), 2.06–1.90 (m, 6H), 1.73–1.70 (m, 1H), 1.48–1.23 (m, 4H);  $^{13}\text{C}$  NMR (101 MHz,  $\text{CDCl}_3$ )  $\delta$  146.7, 146.0, 145.2, 137.2, 133.9, 128.6, 128.0, 127.7, 127.1, 126.8, 126.6, 108.4, 95.4, 57.5, 38.0, 32.1, 32.1, 25.7, 25.3. HRMS (ESI):  $m/z$  calcd for  $\text{C}_{24}\text{H}_{25}\text{N}_2\text{O}$  [ $\text{M} + \text{H}$ ] 357.1967, found 357.1964.

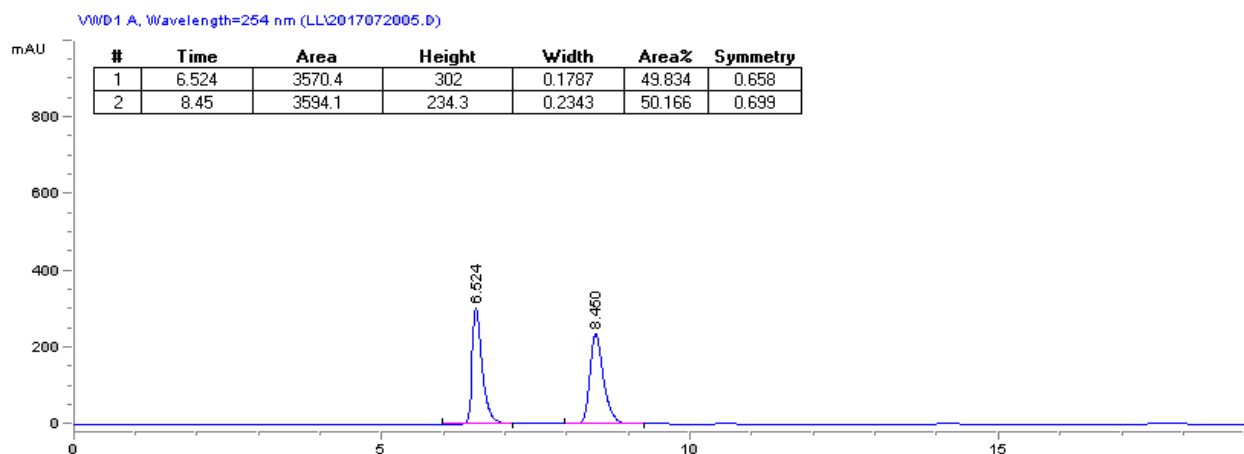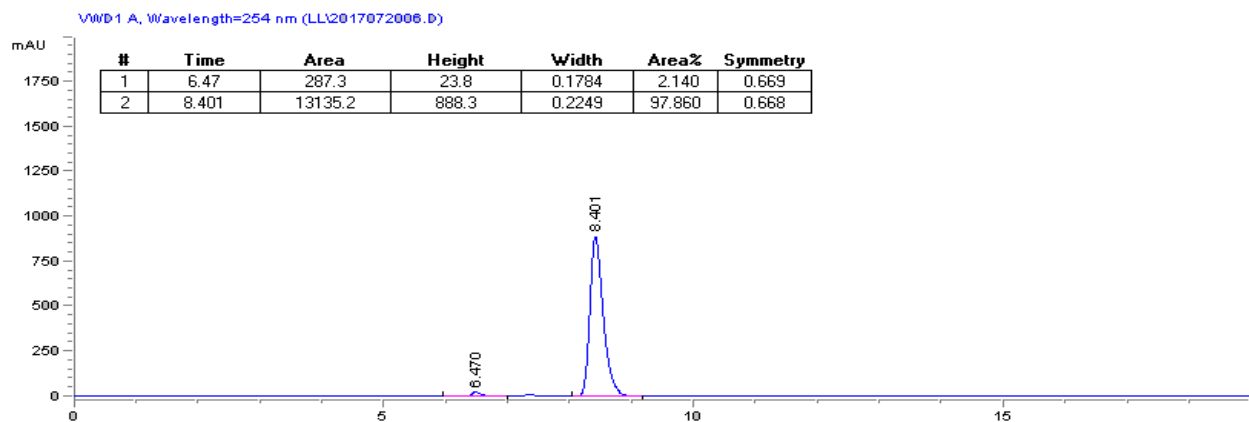

**(R)-3,4-diphenyl-1,4-dihydropyrano[2,3-*c*]pyrazole (3oa).** Colorless oil was obtained in 36% yield after

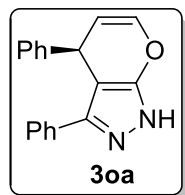

purification with column chromatography on silica gel (petroleum ether/ethyl acetate, 10/1). 81% ee was determined by chiral HPLC (Chiralcel OD-H, *n*-hexane/*i*-PrOH = 90/10, 0.8 mL/min, 254 nm, 40 °C):  $t_R$  (major) = 11.3 min,  $t_R$  (minor) = 12.4 min.  $^1\text{H}$  NMR (400 MHz,

DMSO-*d*<sub>6</sub>)  $\delta$  12.71 (s, 1H), 7.46–7.41 (m, 2H), 7.30–7.06 (m, 8H), 6.71–6.69 (m, 1H), 5.04–4.98 (m, 2H); <sup>13</sup>C NMR (101 MHz, DMSO-*d*<sub>6</sub>) 145.6, 139.0, 129.0, 128.8, 128.4, 127.9, 126.8, 126.5, 107.1, 101.8, 36.5. HRMS (ESI): *m/z* calcd for C<sub>18</sub>H<sub>15</sub>N<sub>2</sub>O [M + H] 275.1184, found 275.1185.

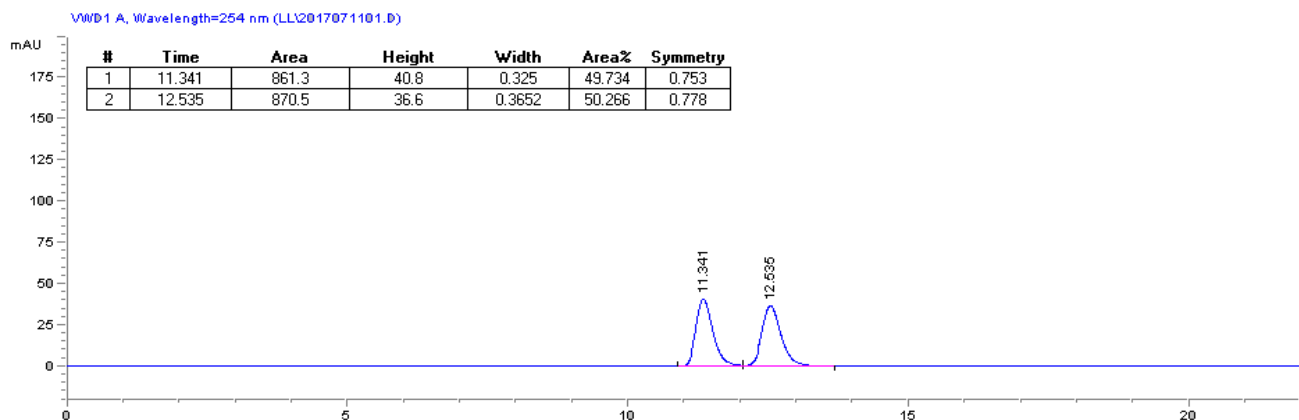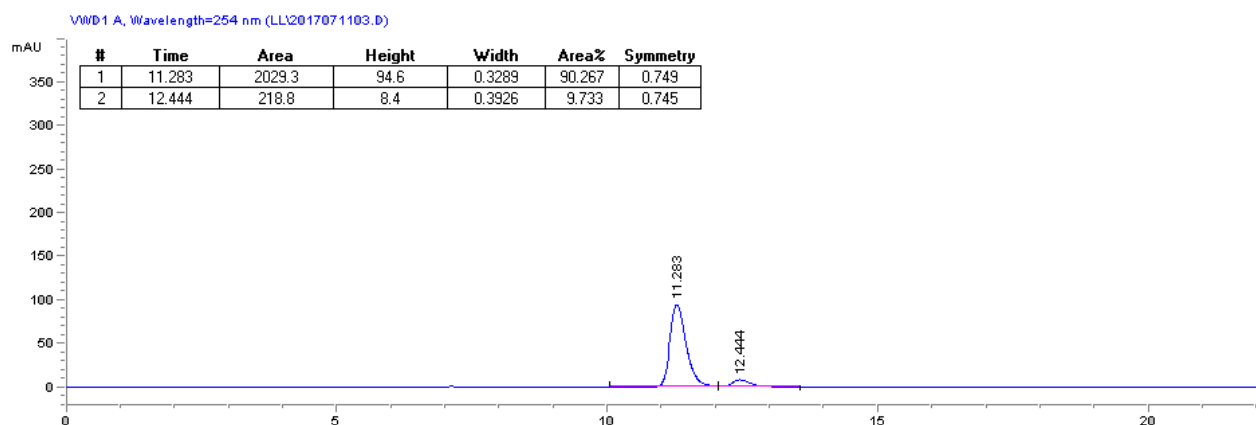

**(*R*)-4-(2-chlorophenyl)-1,3-diphenyl-1,4-dihydropyrano[2,3-*c*]pyrazole (3ab).** Pale pink solid oil was

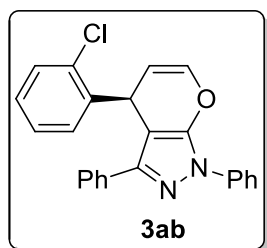

obtained in 68% yield after purification with column chromatography on silica gel (petroleum ether/ethyl acetate, 100/1). M.p.: 138–140 °C. 94% ee was determined by chiral HPLC (Chiralcel OD-H, *n*-hexane/*i*-PrOH = 98/2, 0.8 mL/min, 254 nm, 40 °C): *t<sub>R</sub>* (minor) = 9.1 min, *t<sub>R</sub>* (major) = 14.1 min. <sup>1</sup>H NMR (400 MHz, CDCl<sub>3</sub>)  $\delta$  7.91–7.89 (m, 2H), 7.55–7.53 (m, 2H), 7.48–7.45 (m, 2H), 7.34–7.27 (m, 2H), 7.23–7.03 (m, 6H), 6.54 (dd, *J* = 6.1, 1.5 Hz, 1H), 5.49 (dd, *J* = 3.9, 1.5 Hz, 1H), 5.23 (dd, *J* = 6.0, 4.0 Hz, 1H);

<sup>13</sup>C NMR (101 MHz, CDCl<sub>3</sub>)  $\delta$  148.0, 147.7, 141.4, 138.4, 138.0, 132.9, 132.1, 130.2, 129.4, 129.2, 128.3, 128.1, 127.9, 127.6, 126.5, 121.0, 106.3, 96.2, 34.5. HRMS (ESI): *m/z* calcd for C<sub>24</sub>H<sub>18</sub>ClN<sub>2</sub>O [M + H] 385.1108, found 385.1107.

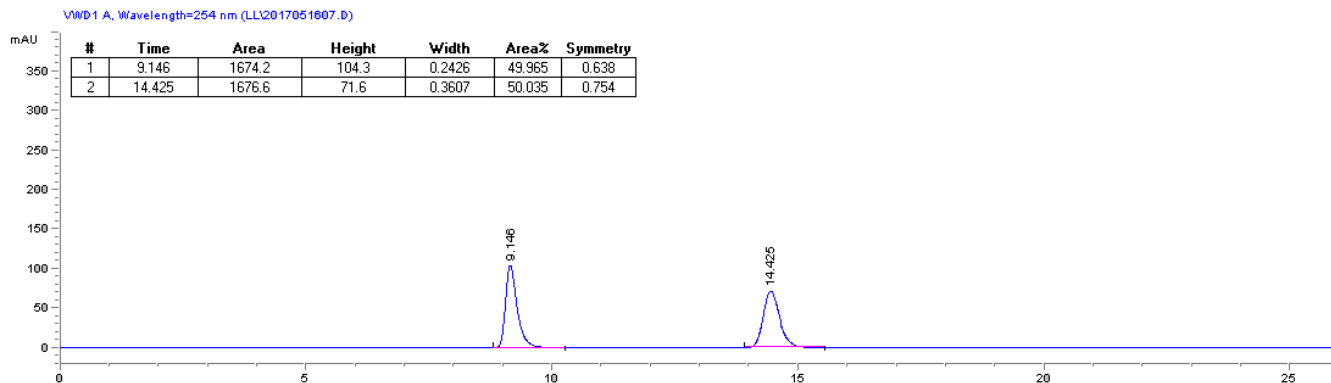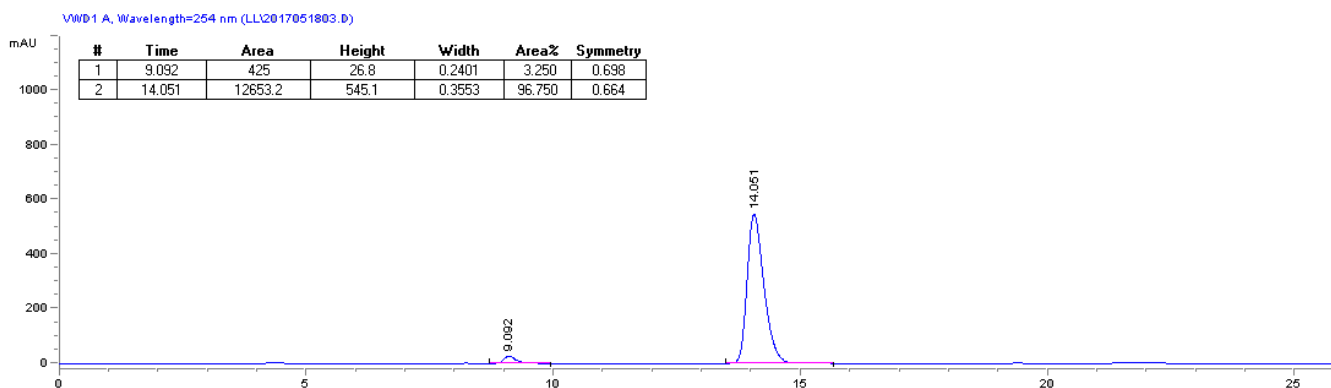

**(R)-4-(3-chlorophenyl)-1,3-diphenyl-1,4-dihydropyrano[2,3-*c*]pyrazole (3ac).** Colorless oil was obtained in

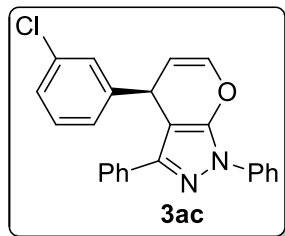

91% yield after purification with column chromatography on silica gel (petroleum ether/ethyl acetate, 100/1). 95% ee was determined by chiral HPLC (Chiralcel OJ-H, *n*-hexane/*i*-PrOH = 50/50, 0.8 mL/min, 254 nm, 40 °C):  $t_R$  (major) = 8.8 min,  $t_R$  (minor) = 16.7 min.  $^1\text{H}$  NMR (400 MHz,  $\text{CDCl}_3$ )  $\delta$  7.89–7.87 (m, 2H), 7.53–7.44 (m, 4H), 7.31–7.05 (m, 8H), 6.57 (dd,  $J$  = 6.0, 1.5 Hz, 1H), 5.09 (dd,  $J$  = 6.0, 4.1 Hz, 1H), 4.90 (dd,  $J$  = 4.0, 1.4 Hz, 1H);  $^{13}\text{C}$  NMR (101 MHz,  $\text{CDCl}_3$ )  $\delta$  148.2, 147.3, 146.7, 138.2, 137.8, 134.6, 133.0, 129.9, 129.2, 128.3, 128.0, 127.1, 127.0, 126.5, 125.9, 121.1, 107.7, 96.9, 37.7. HRMS (ESI):  $m/z$  calcd for  $\text{C}_{24}\text{H}_{18}\text{ClN}_2\text{O}$  [ $\text{M} + \text{H}$ ] 385.1108, found 385.1115.

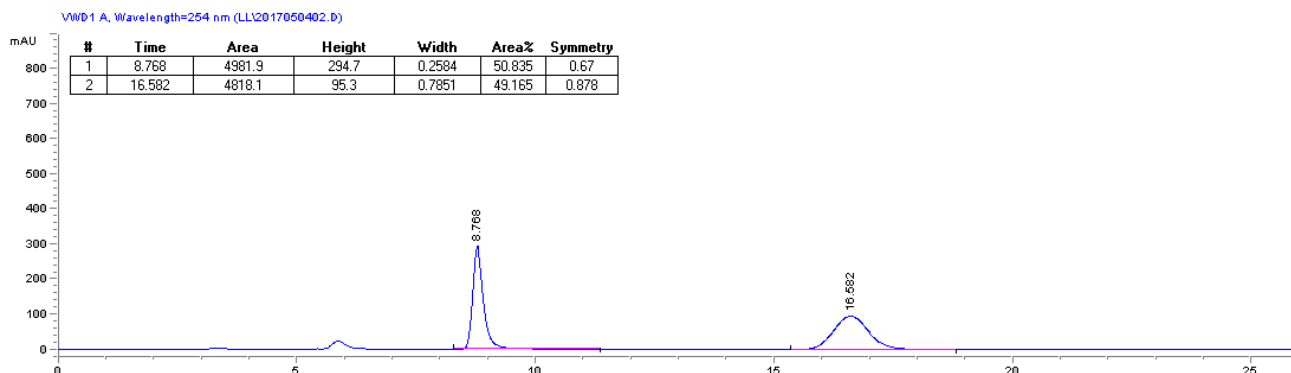

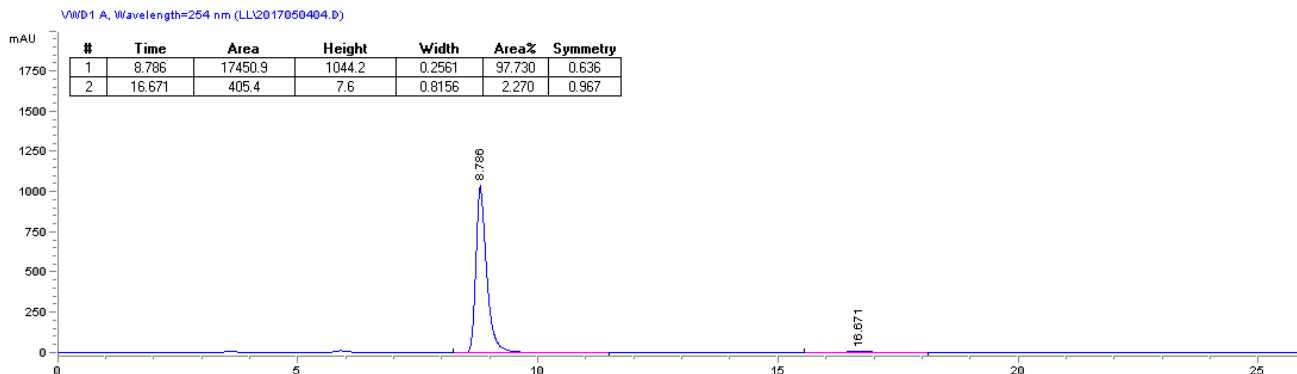

**(R)-4-(4-chlorophenyl)-1,3-diphenyl-1,4-dihydropyrano[2,3-*c*]pyrazole (3ad).** Colorless oil was obtained in

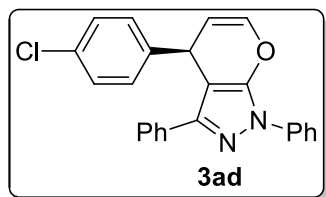

96% yield after purification with column chromatography on silica gel (petroleum ether/ethyl acetate, 100/1). 92% ee was determined by chiral HPLC (Chiralcel OJ-H, *n*-hexane/*i*-PrOH = 50/50, 0.8 mL/min, 254 nm, 40 °C):  $t_R$  (major) = 9.5 min,  $t_R$  (minor) = 11.1 min.  $^1\text{H}$  NMR (400 MHz,  $\text{CDCl}_3$ )  $\delta$  7.89–7.87 (m, 2H), 7.53–7.44 (m, 4H), 7.30–7.10 (m, 8H), 6.55 (dd,  $J$  = 6.0, 1.5 Hz, 1H), 5.08 (dd,  $J$  = 6.0, 4.1 Hz, 1H), 4.90 (dd,  $J$  = 4.0, 1.3 Hz, 1H);  $^{13}\text{C}$  NMR (101 MHz,  $\text{CDCl}_3$ )  $\delta$  148.1, 147.3, 143.2, 138.3, 137.7, 133.0, 132.5, 129.2, 129.1, 128.9, 128.3, 128.0, 127.0, 126.5, 121.1, 108.0, 97.0, 37.4. HRMS (ESI):  $m/z$  calcd for  $\text{C}_{24}\text{H}_{18}\text{ClN}_2\text{O}$  [ $\text{M} + \text{H}$ ] 385.1108, found 385.1107.

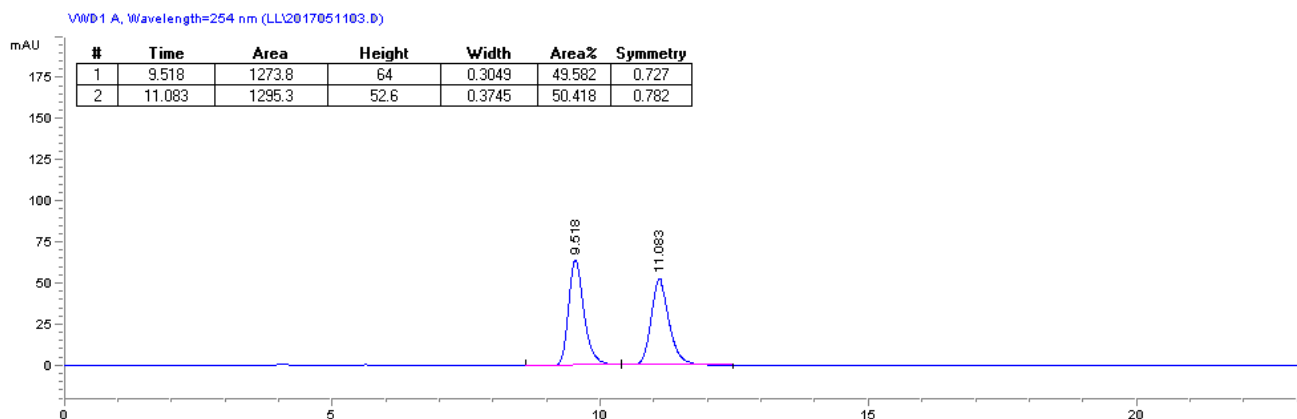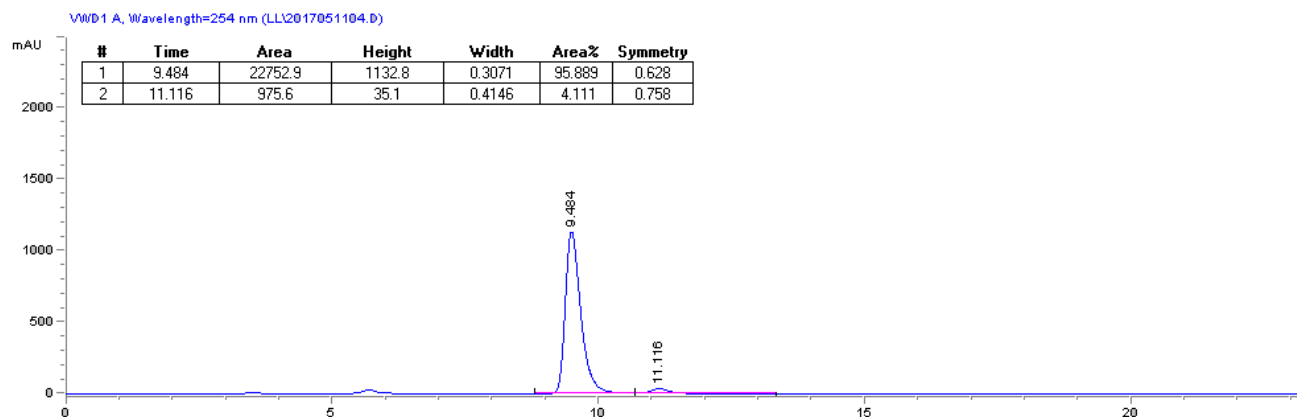



**(R)-4-(4-fluorophenyl)-1,3-diphenyl-1,4-dihydropyrano[2,3-*c*]pyrazole (3ae).** Colorless oil was obtained in

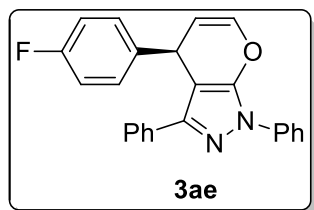

86% yield after purification with column chromatography on silica gel (petroleum ether/ethyl acetate, 100/1). 90% ee was determined by chiral HPLC (Chiralcel OJ-H, *n*-hexane/*i*-PrOH = 50/50, 0.8 mL/min, 254 nm, 40 °C):  $t_R$  (major) = 9.2 min,  $t_R$  (minor) = 12.6 min.  $^1\text{H}$  NMR (400 MHz,  $\text{CDCl}_3$ )  $\delta$  7.89–7.86 (m, 2H), 7.55–7.50 (m, 2H), 7.47–7.41 (m, 2H), 7.29–7.25 (m, 1H), 7.24–7.18 (m, 3H), 7.17–7.11 (m, 2H), 6.92–6.86 (m, 2H), 6.53 (dd,  $J$  = 6.0, 1.5 Hz, 1H), 5.07 (dd,  $J$  = 6.0, 4.0 Hz, 1H), 4.89 (dd,  $J$  = 4.0, 1.3 Hz, 1H);  $^{13}\text{C}$  NMR (101 MHz,  $\text{CDCl}_3$ )  $\delta$  161.6 (d,  $J$  = 245.1 Hz), 148.2, 147.3, 140.6 (d,  $J$  = 3.1 Hz), 138.3, 137.5, 133.1, 129.3 (d,  $J$  = 8.1 Hz), 129.2, 128.2, 128.0, 127.0, 126.5, 121.0, 115.5 (d,  $J$  = 21.4 Hz), 108.3, 97.4, 37.2. HRMS (ESI):  $m/z$  calcd for  $\text{C}_{24}\text{H}_{18}\text{FN}_2\text{O}$  [ $\text{M} + \text{H}$ ] 369.1403, found 369.1411.

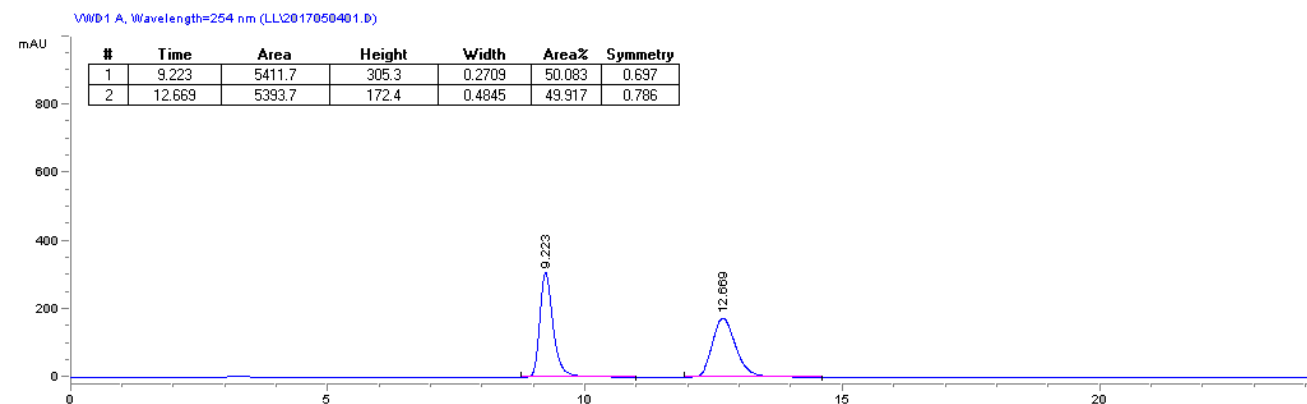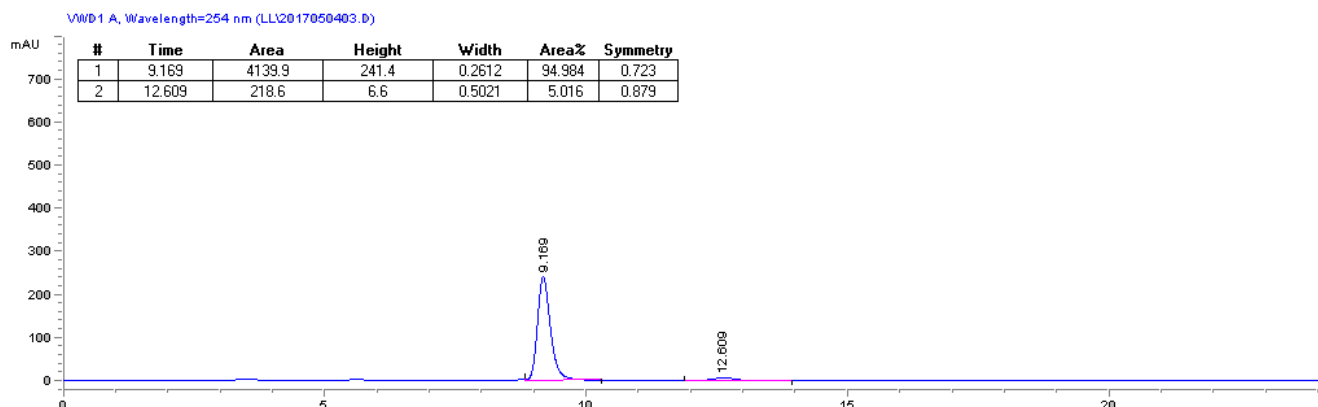

**(R)-4-(4-bromophenyl)-1,3-diphenyl-1,4-dihydropyrano[2,3-*c*]pyrazole (3af).** Pale pink solid was obtained

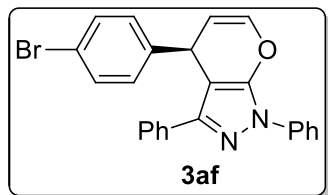

in 91% yield after purification with column chromatography on silica gel (petroleum ether/ethyl acetate, 100/1). M.p.: 140–142 °C. 93% ee was determined by chiral HPLC (Chiralcel OJ-H, *n*-hexane/*i*-PrOH = 95/5, 0.8 mL/min, 254 nm, 40 °C):  $t_R$  (major) = 23.4 min,  $t_R$  (minor) = 27.0 min.  $^1\text{H}$  NMR (400 MHz,  $\text{CDCl}_3$ )  $\delta$  7.89–7.87 (m, 2H), 7.53–7.52 (m, 2H), 7.49–7.46 (m, 2H), 7.36–7.23 (m, 6H), 7.09–7.07 (m, 2H), 6.59–6.58 (m, 1H), 5.12–5.10 (m, 1H), 4.92–4.91 (m, 1H);  $^{13}\text{C}$  NMR (101 MHz,  $\text{CDCl}_3$ )  $\delta$

148.1, 147.3, 143.8, 138.3, 137.7, 133.0, 131.8, 129.4, 129.1, 128.2, 128.0, 127.0, 126.5, 121.1, 120.7, 107.9, 96.9, 37.4. HRMS (ESI):  $m/z$  calcd for  $C_{24}H_{18}BrN_2O$  [M + H] 429.0603, found 429.0601.

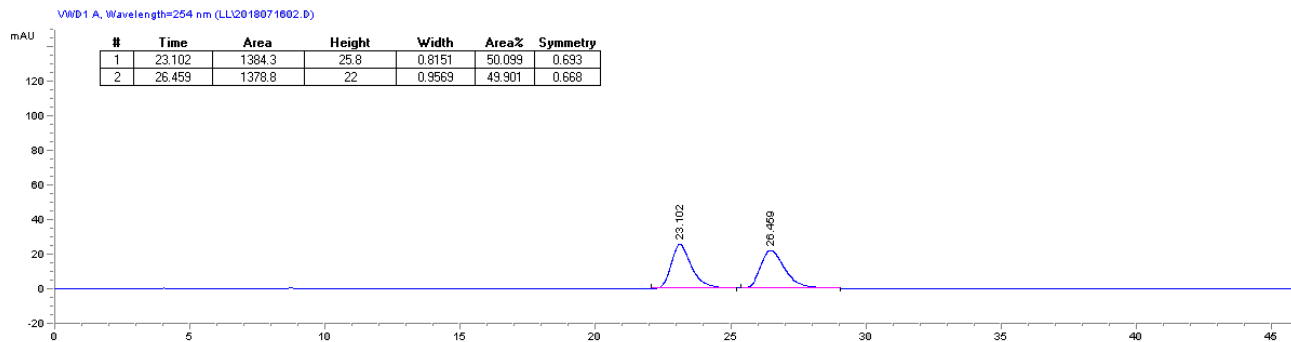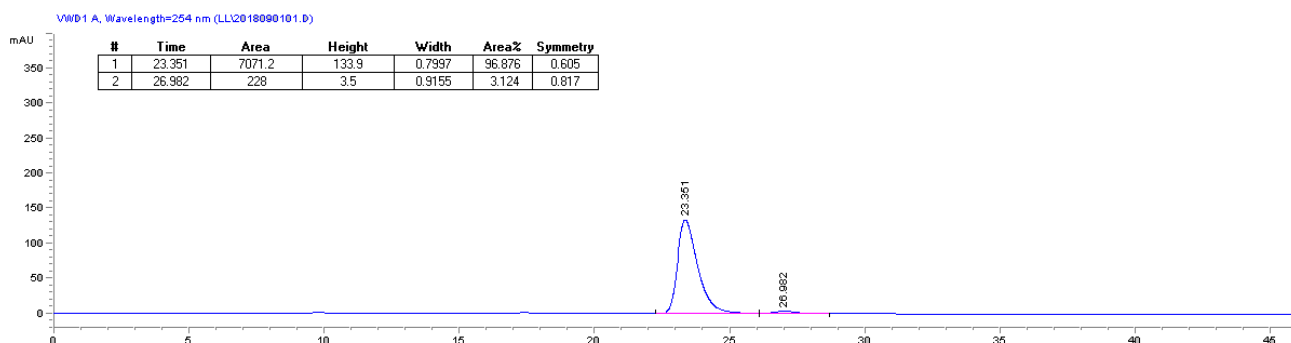

**(R)-1,3-diphenyl-4-(p-tolyl)-1,4-dihydropyrano[2,3-c]pyrazole (3ag).** Colorless oil was obtained in 95% yield after purification with column chromatography on silica gel (petroleum ether/ethyl acetate, 100/1). 87% ee was determined by chiral HPLC (Chiralcel AD-H, *n*-hexane/*i*-PrOH = 98/2, 0.8 mL/min, 254 nm, 40 °C):  $t_R$  (minor) = 8.8 min,  $t_R$  (major) = 10.5 min.  $^1H$  NMR (400 MHz,  $CDCl_3$ )  $\delta$  7.90–7.88 (m, 2H), 7.57–7.56 (m, 2H), 7.49–7.45 (m, 2H), 7.30–7.17 (m, 4H), 7.11–7.04 (m, 4H), 6.55 (dd,  $J$  = 6.0, 0.9 Hz, 1H), 5.14 (dd,  $J$  = 5.9, 4.2 Hz, 1H), 4.89–4.88 (m, 1H), 2.26 (s, 3H);  $^{13}C$  NMR (101 MHz,  $CDCl_3$ )  $\delta$  148.1, 147.4, 141.9, 138.4, 137.2, 136.4, 133.2, 129.4, 129.1, 128.2, 127.8, 127.6, 127.0, 126.3, 121.1, 108.8, 97.5, 37.5, 21.1. HRMS (ESI):  $m/z$  calcd for  $C_{25}H_{21}N_2O$  [M + H] 365.1654, found 365.1651.

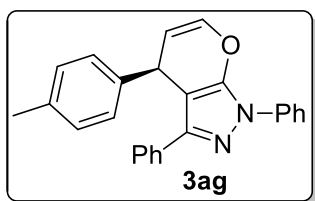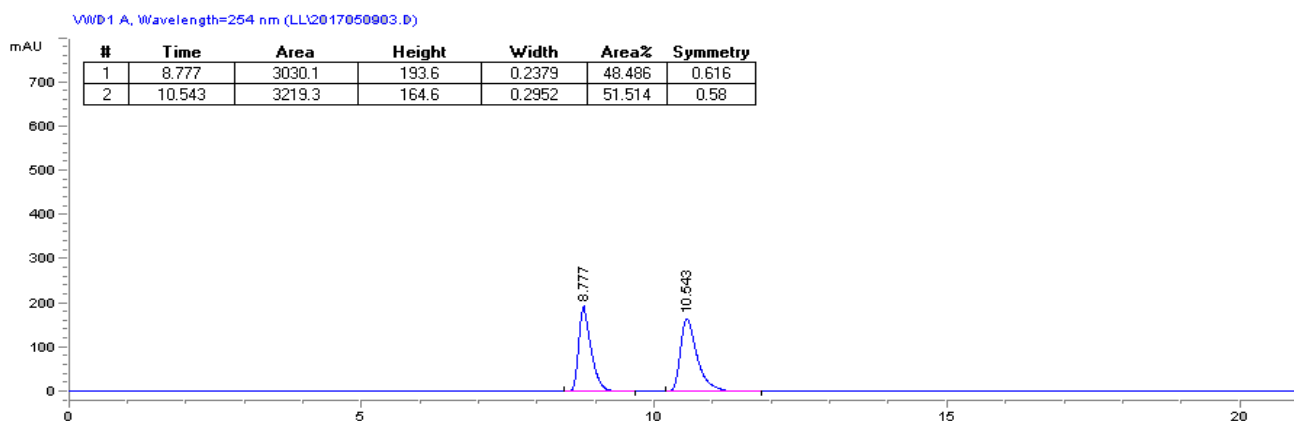

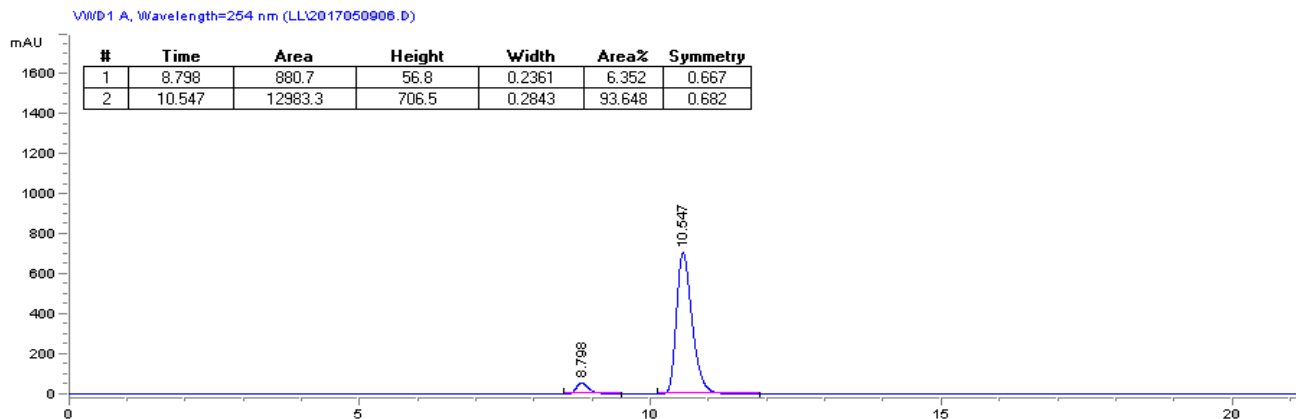

**(R)-4-(4-methoxyphenyl)-1,3-diphenyl-1,4-dihydropyrano[2,3-c]pyrazole (3ah).** Colorless oil was obtained

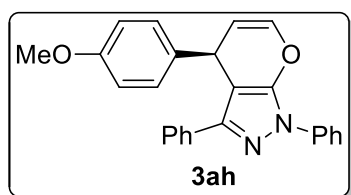

in 92% yield after purification with column chromatography on silica gel

(petroleum ether/ethyl acetate, 100/1). 79% ee was determined by chiral HPLC

(Chiralcel AD-H, *n*-hexane/*i*-PrOH = 98/2, 0.8 mL/min, 254 nm, 40 °C):  $t_R$  (minor)

= 14.2 min,  $t_R$  (major) = 19.0 min.  $^1\text{H}$  NMR (400 MHz,  $\text{CDCl}_3$ )  $\delta$  7.90–7.88 (m,

2H), 7.57–7.55 (m, 2H), 7.50–7.44 (m, 2H), 7.30–7.17 (m, 4H), 7.13–7.11 (m,

2H), 6.78–6.76 (m, 2H), 6.53 (dd,  $J$  = 6.0, 0.8 Hz, 1H), 5.11 (dd,  $J$  = 5.9, 4.2 Hz, 1H), 4.87–4.86 (m, 1H), 3.70

(s, 3H);  $^{13}\text{C}$  NMR (101 MHz,  $\text{CDCl}_3$ )  $\delta$  158.4, 148.2, 147.4, 138.4, 137.1, 133.2, 129.1, 128.7, 128.2, 127.8,

127.1, 126.4, 121.1, 114.1, 108.8, 97.7, 55.2, 37.1. HRMS (ESI):  $m/z$  calcd for  $\text{C}_{25}\text{H}_{21}\text{N}_2\text{O}_2$  [ $\text{M} + \text{H}$ ] 381.1603,

found 381.1606.

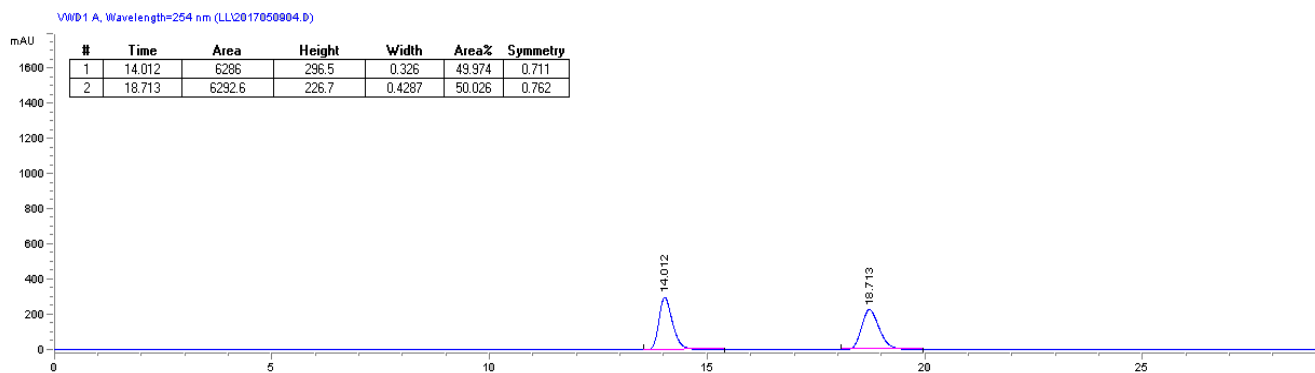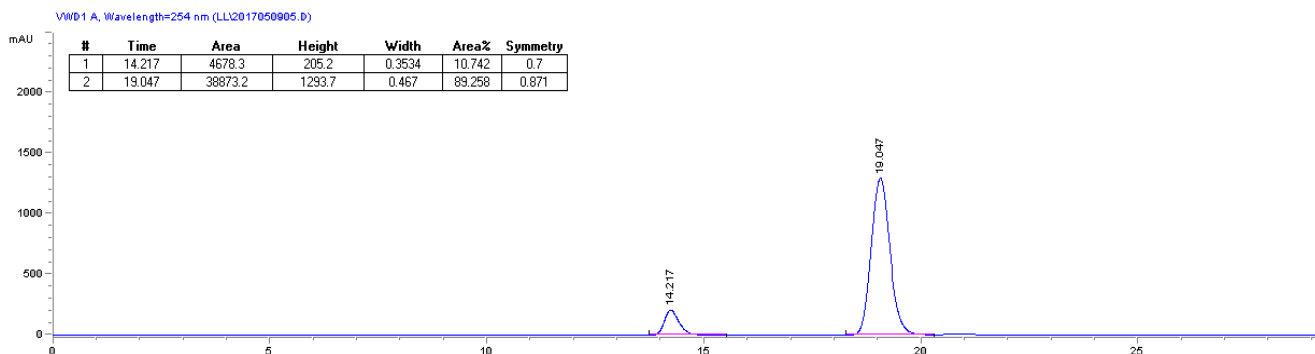

**(R)-1,3-diphenyl-4-(4-(trifluoromethyl)phenyl)-1,4-dihydropyrano[2,3-c]pyrazole (3ai).** Colorless oil was

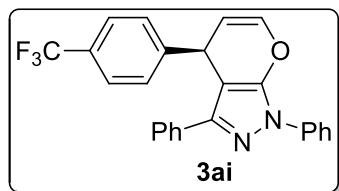

obtained in 85% yield after purification with column chromatography on silica gel (petroleum ether/ethyl acetate, 100/1). 94% ee was determined by chiral HPLC (Chiralcel OJ-H, *n*-hexane/*i*-PrOH = 50/50, 0.8 mL/min, 254 nm, 40 °C):  $t_R$  (major) = 16.4 min,  $t_R$  (minor) = 19.2 min.  $^1\text{H}$  NMR (400 MHz,  $\text{CDCl}_3$ )  $\delta$  7.90–7.87 (m, 2H), 7.52–7.45 (m, 6H), 7.32–7.28 (m, 3H), 7.25–7.20 (m, 3H), 6.60 (dd,  $J$  = 6.0, 1.5 Hz, 1H), 5.11 (dd,  $J$  = 6.0, 4.1 Hz, 1H), 5.02 (dd,  $J$  = 4.0, 1.3 Hz, 1H);  $^{13}\text{C}$  NMR (101 MHz,  $\text{CDCl}_3$ )  $\delta$  148.5 (d,  $J$  = 1.0 Hz), 148.1, 147.3, 138.2, 138.0, 132.9, 129.2, 129.1 (q,  $J$  = 32.3 Hz), 128.3, 128.1, 128.1, 126.9, 126.6, 125.7 (q,  $J$  = 3.7 Hz), 124.1 (d,  $J$  = 272.0 Hz), 121.1, 107.6, 96.6, 37.8. HRMS (ESI):  $m/z$  calcd for  $\text{C}_{25}\text{H}_{18}\text{F}_3\text{N}_2\text{O}$  [ $\text{M} + \text{H}$ ] 419.1371, found 419.1376.

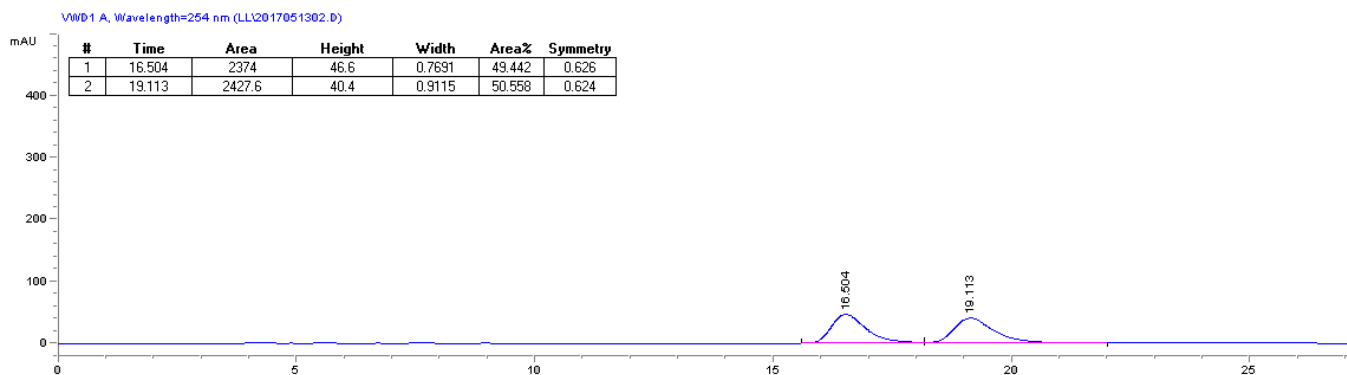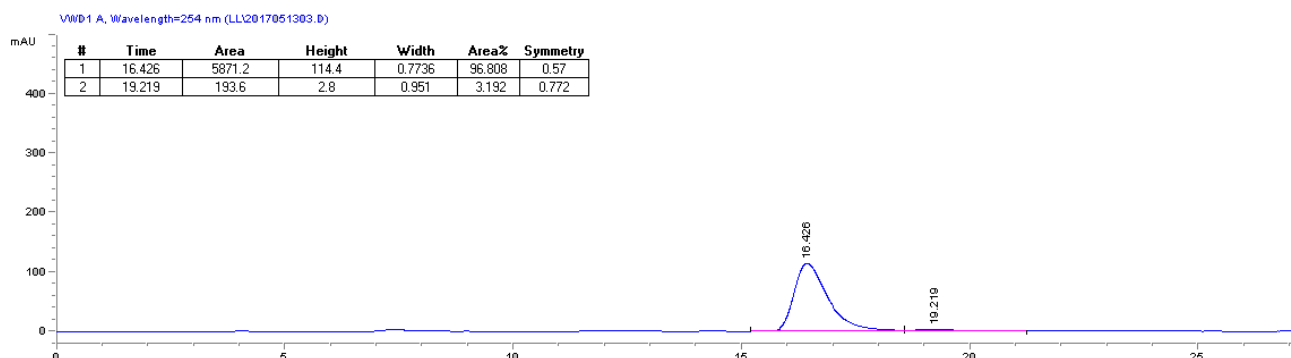

**(R)-4-(naphthalen-2-yl)-1,3-diphenyl-1,4-dihydropyrano[2,3-c]pyrazole (3aj).** Pale pink solid was obtained

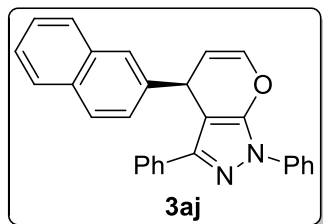

in 95% yield after purification with column chromatography on silica gel (petroleum ether/ethyl acetate, 100/1). M.p.: 138–140 °C. 91% ee was determined by chiral HPLC (Chiralcel AD-H, *n*-hexane/*i*-PrOH = 90/10, 0.8 mL/min, 254 nm, 40 °C):  $t_R$  (minor) = 7.3 min,  $t_R$  (major) = 8.8 min.  $^1\text{H}$  NMR (400 MHz,  $\text{CDCl}_3$ )  $\delta$  7.94–7.92 (m, 2H), 7.74–7.69 (m, 3H), 7.62–7.55 (m, 3H), 7.49–7.45 (m, 2H), 7.41–7.34 (m, 3H), 7.30–7.26 (m, 1H), 7.18–7.11 (m, 3H), 6.55 (dd,  $J$  = 6.0, 1.3 Hz, 1H), 5.16 (dd,  $J$  = 5.9, 4.2 Hz, 1H), 5.07–5.06 (m, 1H);  $^{13}\text{C}$  NMR (101 MHz,  $\text{CDCl}_3$ )  $\delta$  148.3, 147.5, 142.1, 138.5, 137.6, 133.6, 133.1,

132.5, 129.2, 128.7, 128.2, 127.9, 127.9, 127.7, 127.0, 126.4, 126.3, 126.2, 126.0, 125.7, 121.1, 108.4, 97.4, 38.1. HRMS (ESI):  $m/z$  calcd for C<sub>28</sub>H<sub>21</sub>N<sub>2</sub>O [M + H] 401.1654, found 401.1651.

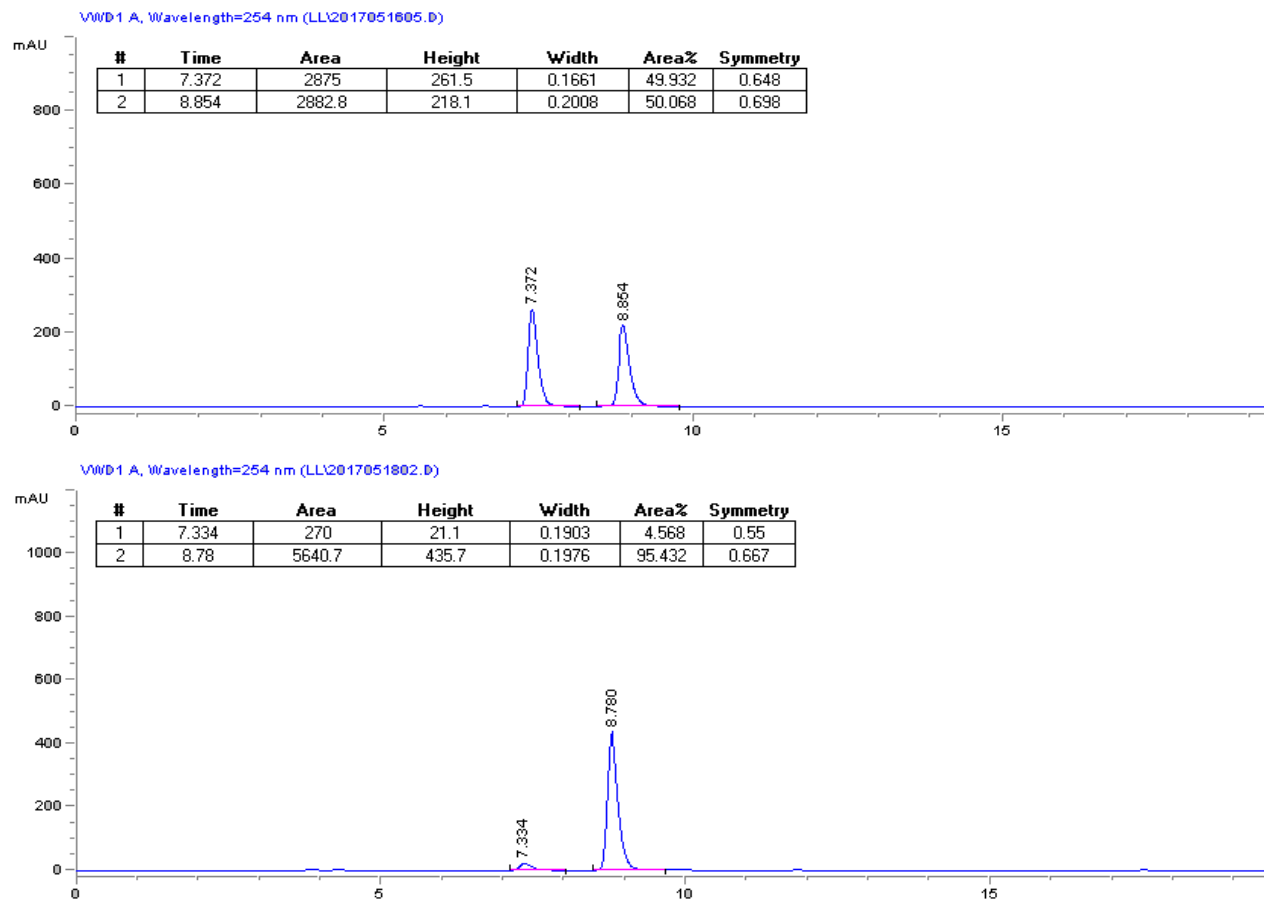

**(S)-1,3-diphenyl-4-(thiophen-2-yl)-1,4-dihydropyrano[2,3-*c*]pyrazole (3ak).** Colorless oil was obtained in 96%

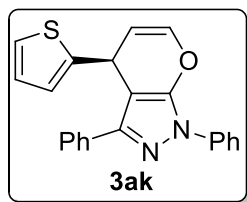

yield after purification with column chromatography on silica gel (petroleum ether/ethyl acetate, 100/1). 89% ee was determined by chiral HPLC (Chiralcel OJ-H, *n*-hexane/*i*-PrOH = 50/50, 0.8 mL/min, 254 nm, 40 °C):  $t_R$  (major) = 9.9 min,  $t_R$  (minor) = 18.8 min. <sup>1</sup>H NMR (400 MHz, CDCl<sub>3</sub>) δ 7.88–7.86 (m, 2H), 7.64–7.62 (m, 2H),

7.46–7.43 (m, 2H), 7.29–7.23 (m, 4H), 7.07–7.06 (m, 1H), 6.81–6.79 (m, 2H), 6.58–6.54 (m, 1H), 5.24–5.21 (m, 2H); <sup>13</sup>C NMR (101 MHz, CDCl<sub>3</sub>) δ 149.7, 148.1, 146.8, 138.3, 137.8, 133.2, 129.2, 128.3, 128.0, 127.1, 126.7, 126.5, 124.6, 124.1, 121.1, 108.0, 97.7, 32.8. HRMS (ESI):  $m/z$  calcd for C<sub>22</sub>H<sub>17</sub>N<sub>2</sub>OS [M + H] 357.1062, found 357.1063.

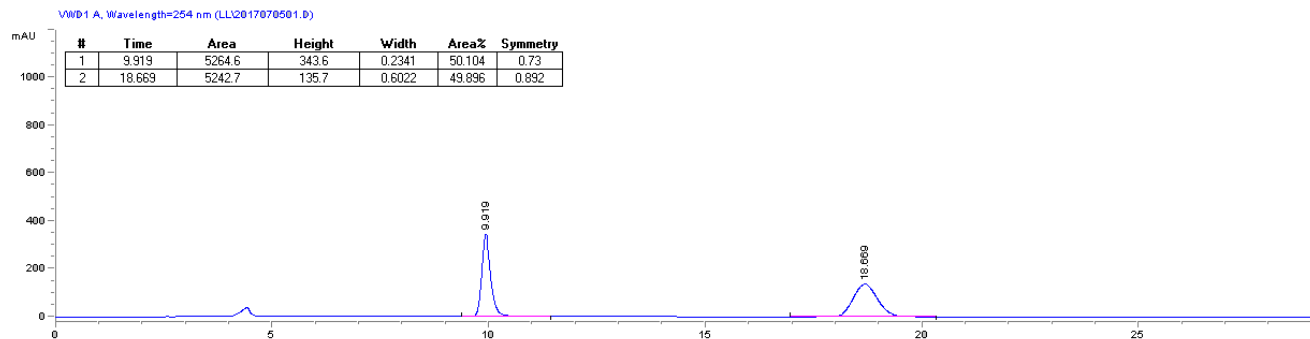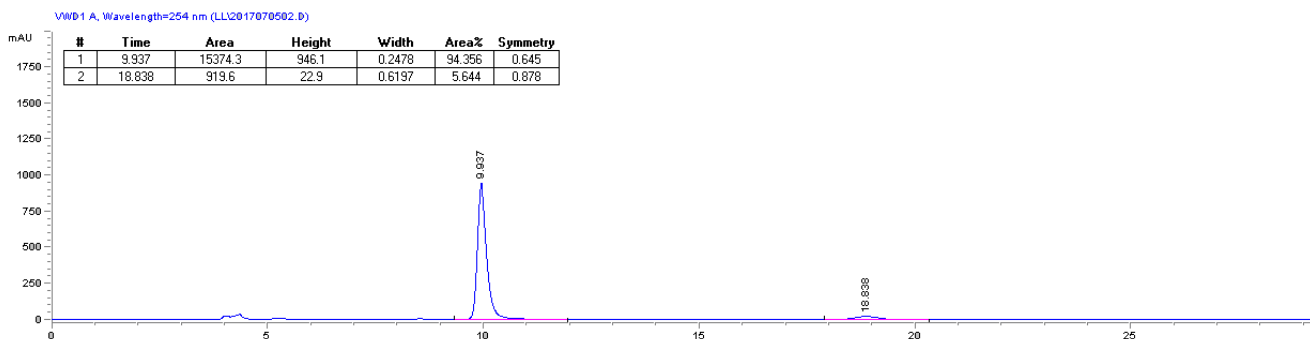

**(S)-4-methyl-1,3-diphenyl-1,4-dihydropyrano[2,3-*c*]pyrazole (3al).** Colorless oil was obtained in 34% yield

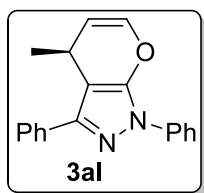

after purification with column chromatography on silica gel (petroleum ether/ethyl acetate, 100/1). 78% ee was determined by chiral HPLC (Chiralcel OJ-H, *n*-hexane/*i*-PrOH = 98/2, 0.8 mL/min, 254 nm, 40 °C):  $t_R$  (minor) = 15.2 min,  $t_R$  (major) = 17.0 min.  $^1\text{H}$  NMR (400 MHz,  $\text{CDCl}_3$ )  $\delta$  7.83–7.75 (m, 4H), 7.46–7.41 (m, 4H), 7.36–7.25 (m, 2H), 6.54–6.53 (m, 1H), 5.05–5.03 (m, 1H), 3.94–3.90 (m, 1H), 1.22 (d,  $J$  = 6.7 Hz, 3H);  $^{13}\text{C}$  NMR (101 MHz,  $\text{CDCl}_3$ )  $\delta$  148.0, 146.5, 138.3, 138.1, 134.0, 129.0, 128.5, 127.9, 127.0, 126.3, 121.1, 109.2, 99.7, 26.2, 23.6. HRMS (ESI):  $m/z$

calcd for  $\text{C}_{19}\text{H}_{17}\text{N}_2\text{O}$  [ $\text{M} + \text{H}$ ] 289.1341, found 289.1338.

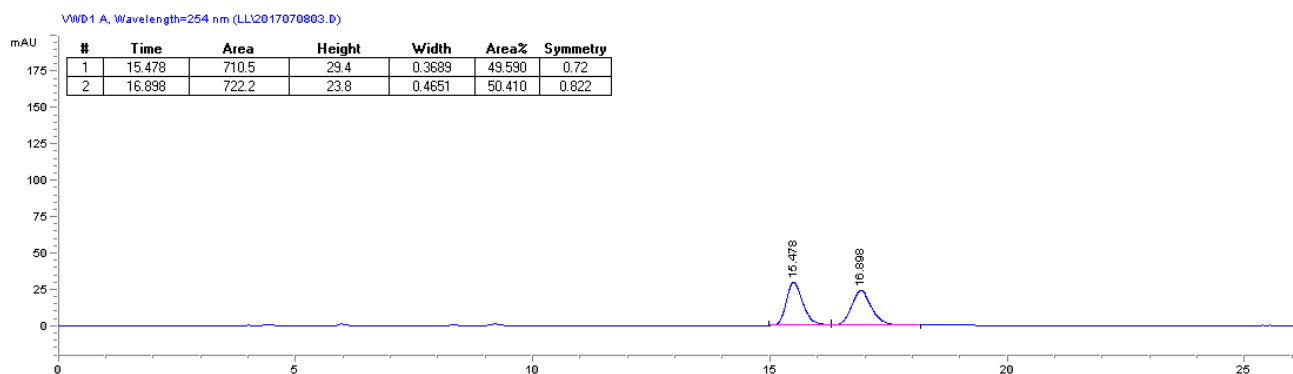

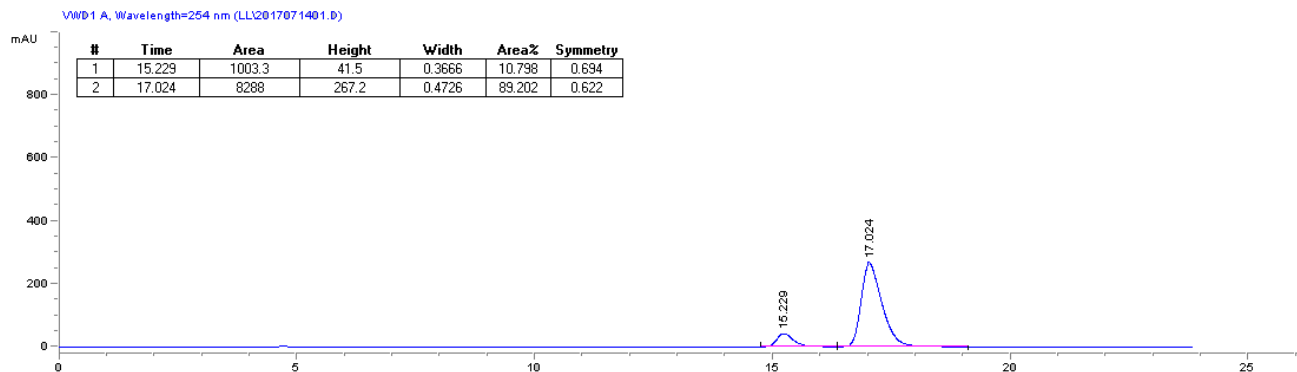

## References

1. M. I. Marzouk, G. H. Sayed, M. S. A. ElHalim and S. Y. Mansour, *Eur. J. Chem.*, 2014, **5**, 24.
2. (a) P. Fang and X.-L. Hou, *Org. Lett.*, 2009, **11**, 4612; (b) M. Bhanuchandra, M. R. Kuram and A. K. Sahoo, *J. Org. Chem.*, 2013, **78**, 11824..

7.87  
7.86  
7.85  
7.84  
7.62  
7.61  
7.60  
7.59  
7.59  
7.58  
7.57  
7.55  
7.41  
7.39  
7.37  
7.29  
7.28  
7.28  
7.26  
7.24  
7.23  
7.22  
7.21  
7.21  
7.16  
7.15  
7.14  
7.13  
7.11  
7.10  
6.88  
6.88  
6.87  
6.86  
5.27  
5.26  
5.26  
5.25  
5.13  
5.13  
5.12  
5.12

LL-116  
PROTON DMSO {D:\NMR400\02T2} nmr 58

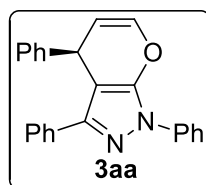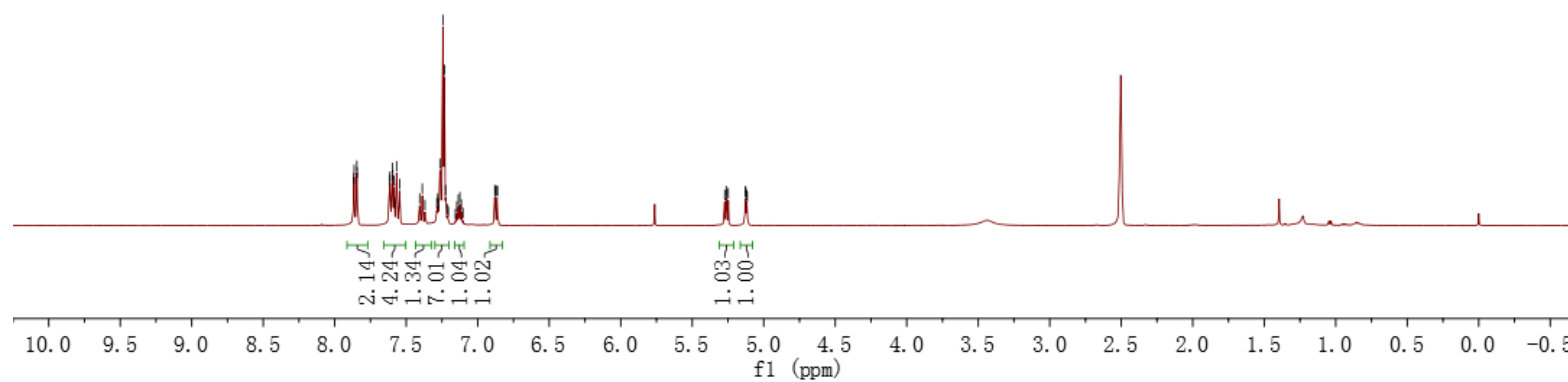



LL-116  
C13CPD DMSO {D:\NMR400\02T2} nmr 58

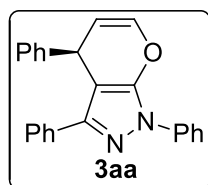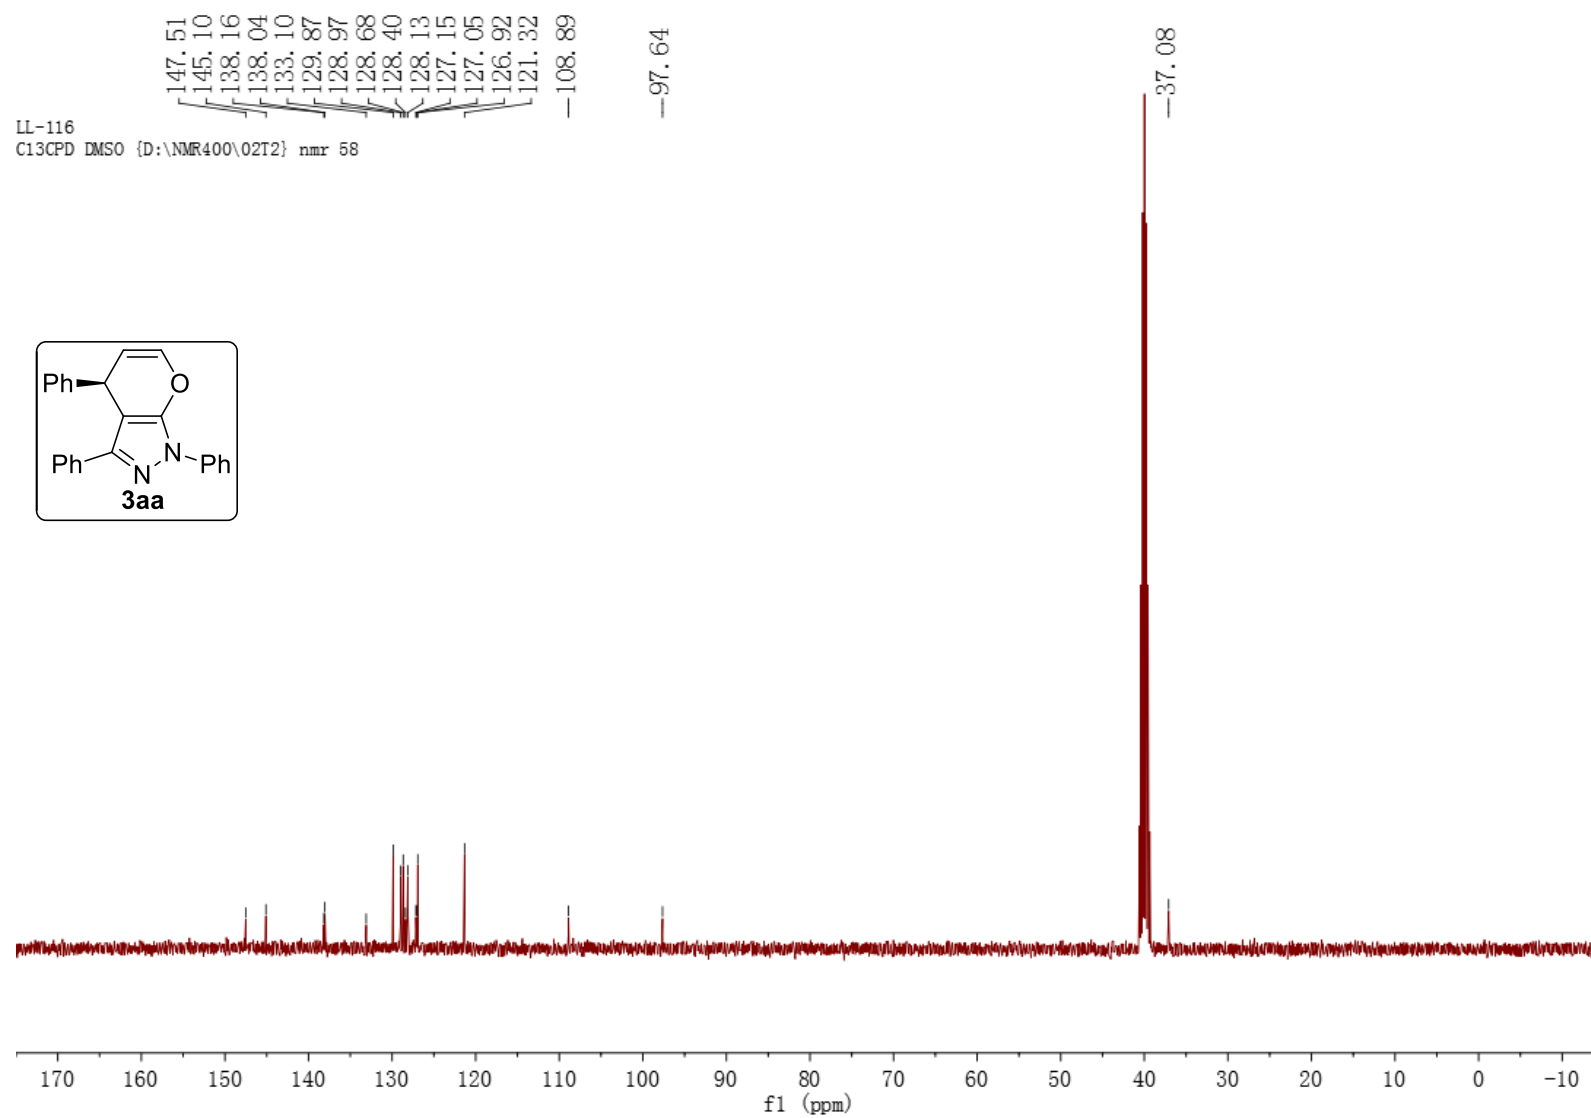

LL-181  
 PROTON CDC13 {D:\NMR400\0212} nmr 9

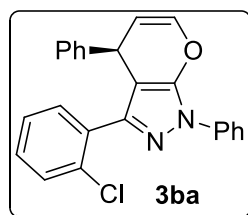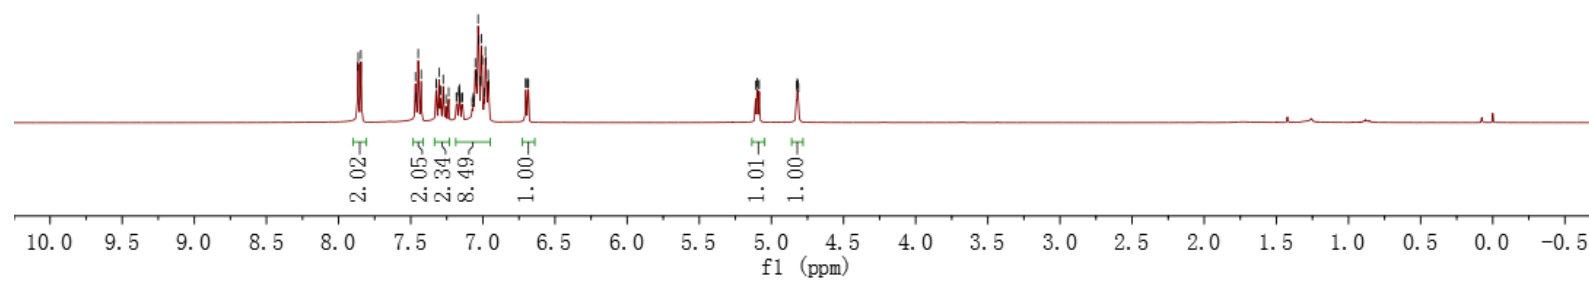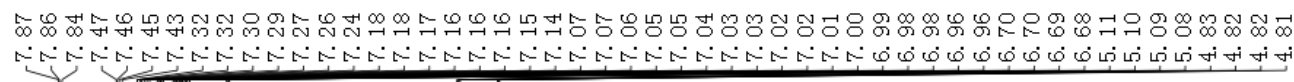

LL-181  
C13CPD CDC13 {D:\NMR400\02T2} nmr 9

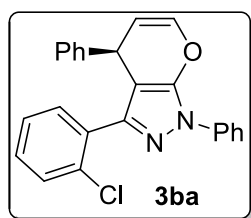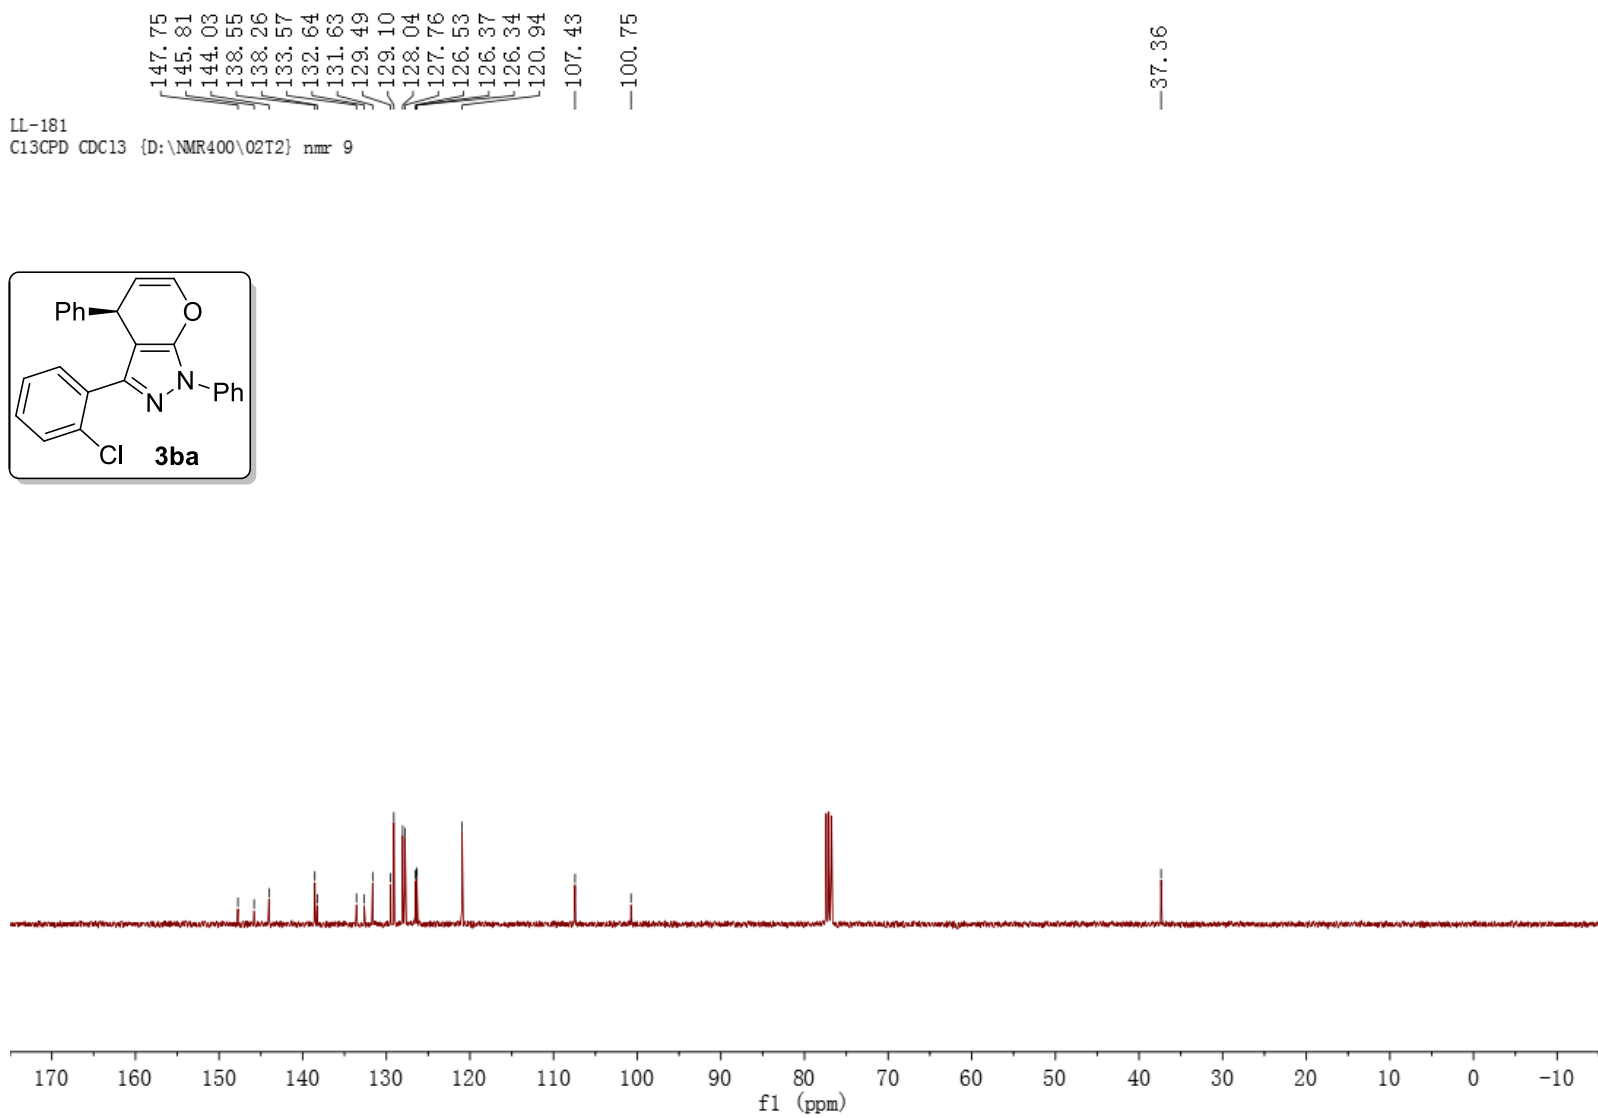

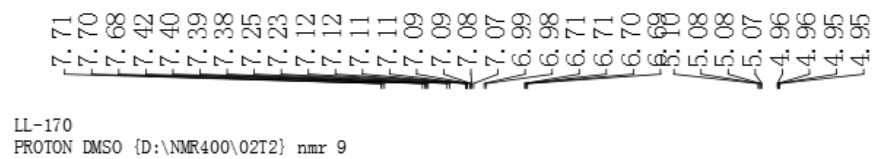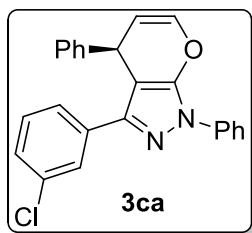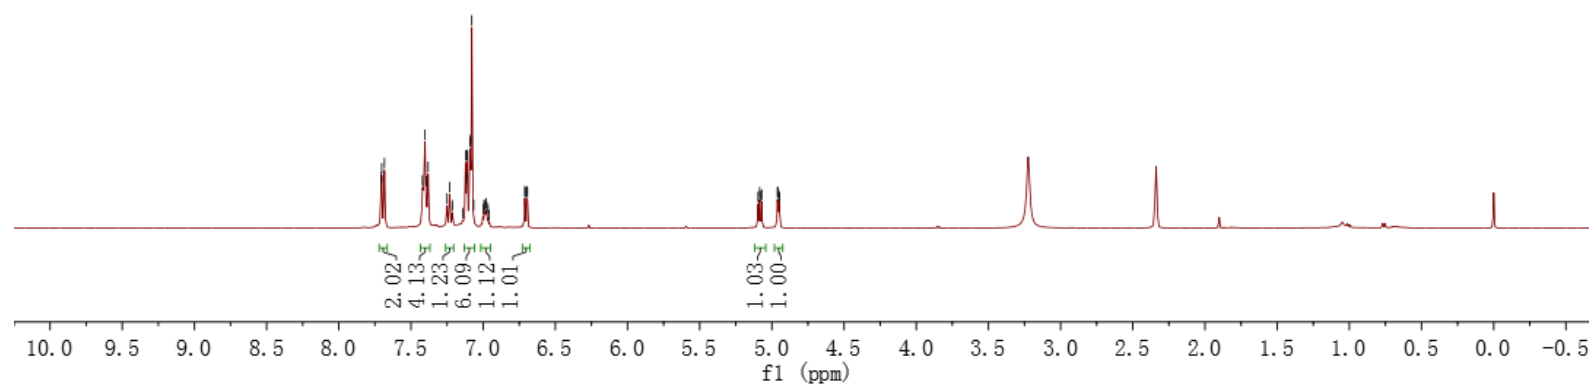

LL-170  
C13CPD DMSO {D:\NMR400\02T2} nmr 9

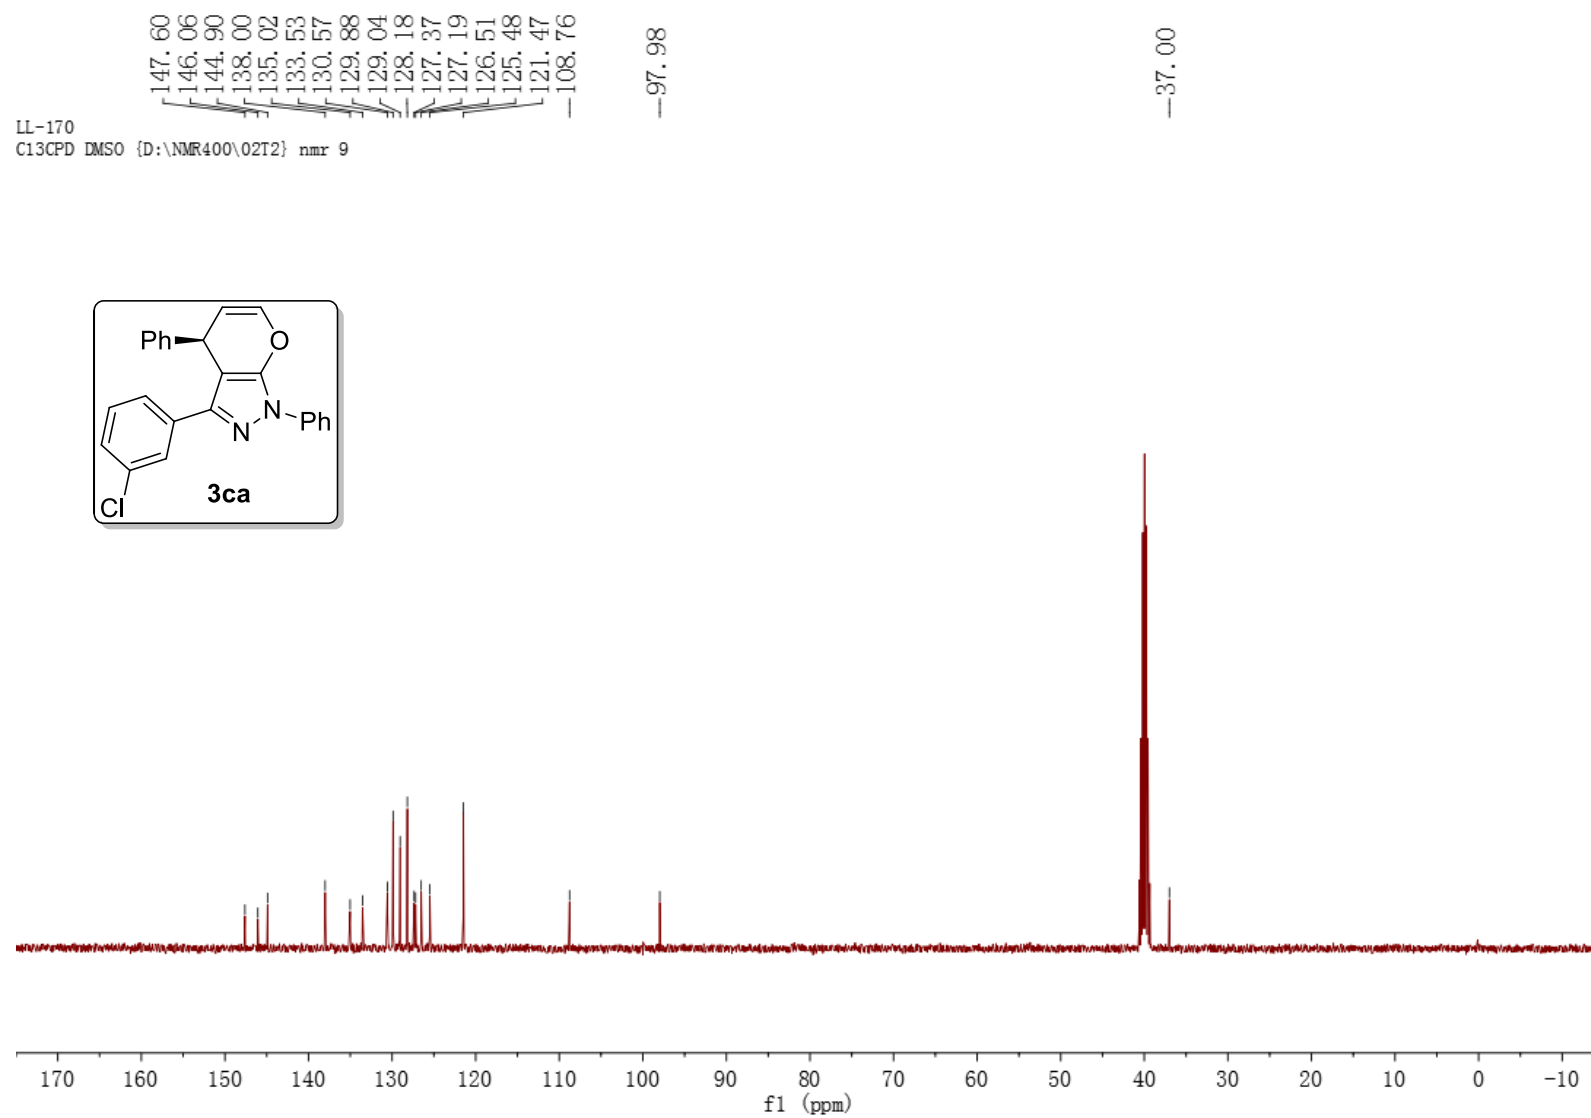

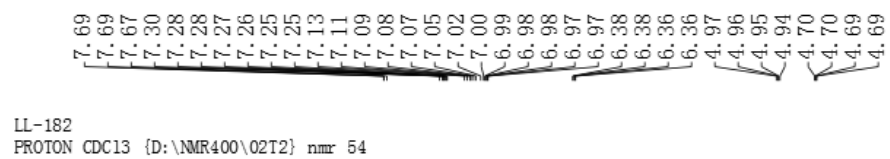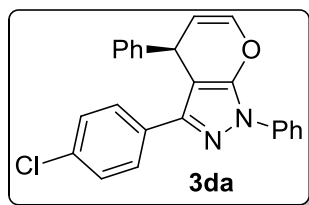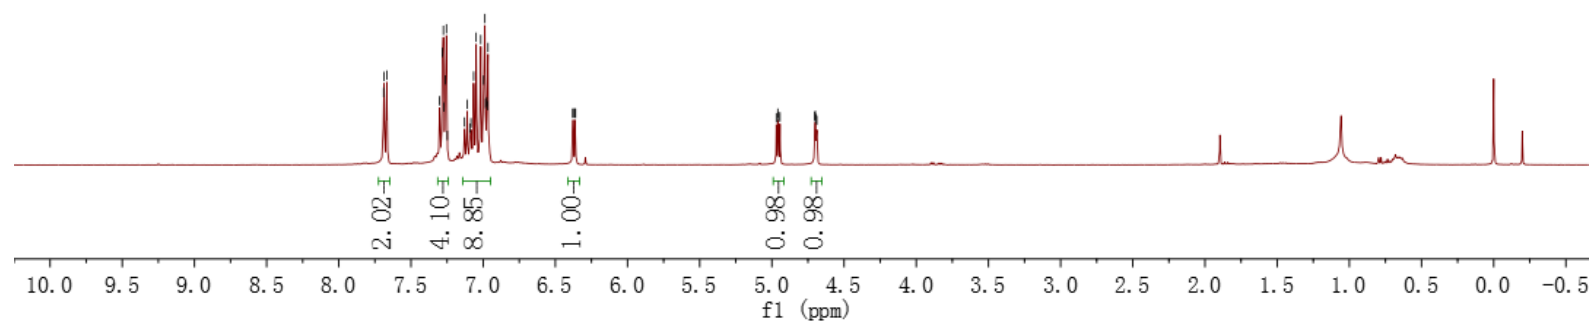

LL-182  
C13CPD CDC13 {D:\NMR400\02T2} nmr 31

147.49  
147.03  
144.52  
138.21  
137.29  
133.66  
131.62  
129.18  
128.85  
128.35  
128.24  
127.70  
127.00  
126.55  
121.09  
108.40  
-97.33

-37.92

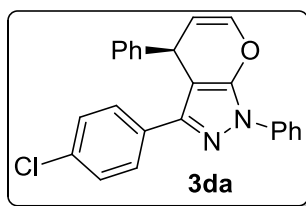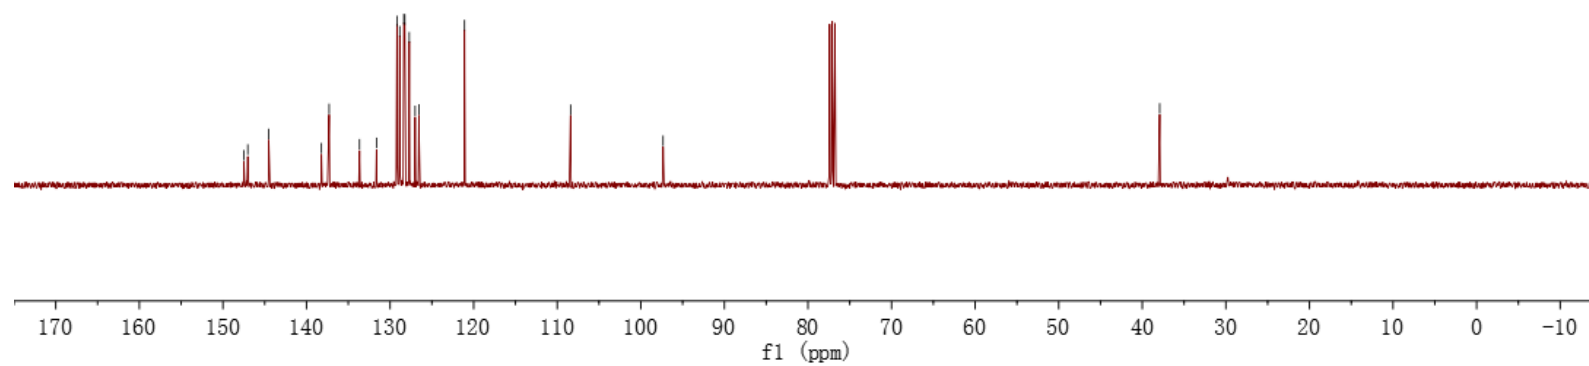

7.89  
 7.87  
 7.50  
 7.49  
 7.48  
 7.48  
 7.47  
 7.45  
 7.29  
 7.24  
 7.23  
 7.20  
 7.18  
 7.17  
 7.15  
 6.91  
 6.89  
 6.87  
 6.56  
 6.56  
 6.55  
 5.54  
 5.14  
 5.13  
 5.12  
 4.88  
 4.88  
 4.87  
 4.87

LL-226  
 PROTON CDC13 {D:\NMR400\02T2} nmr 8

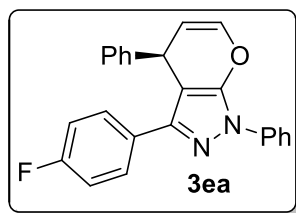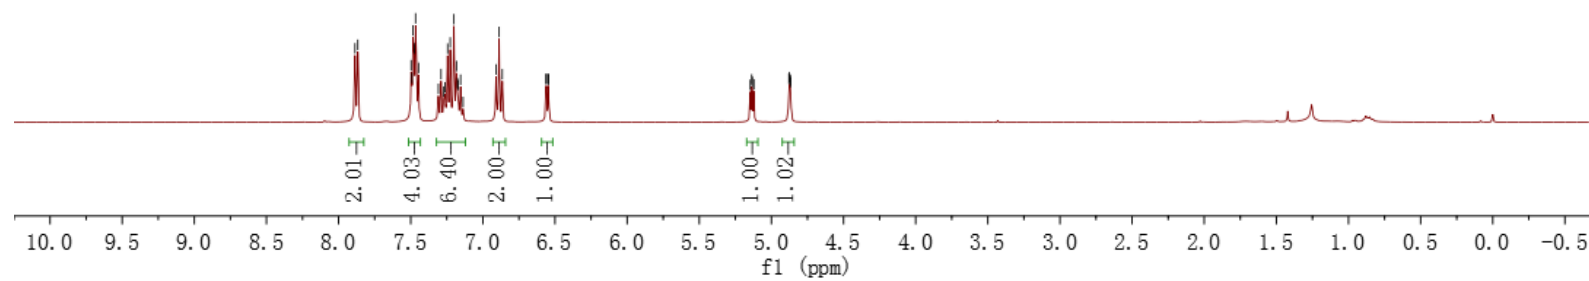



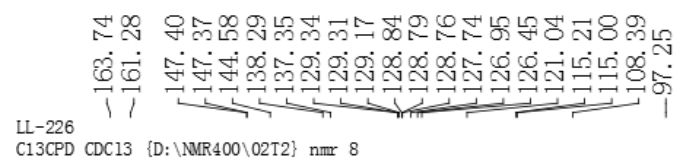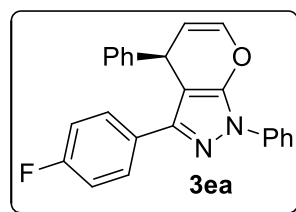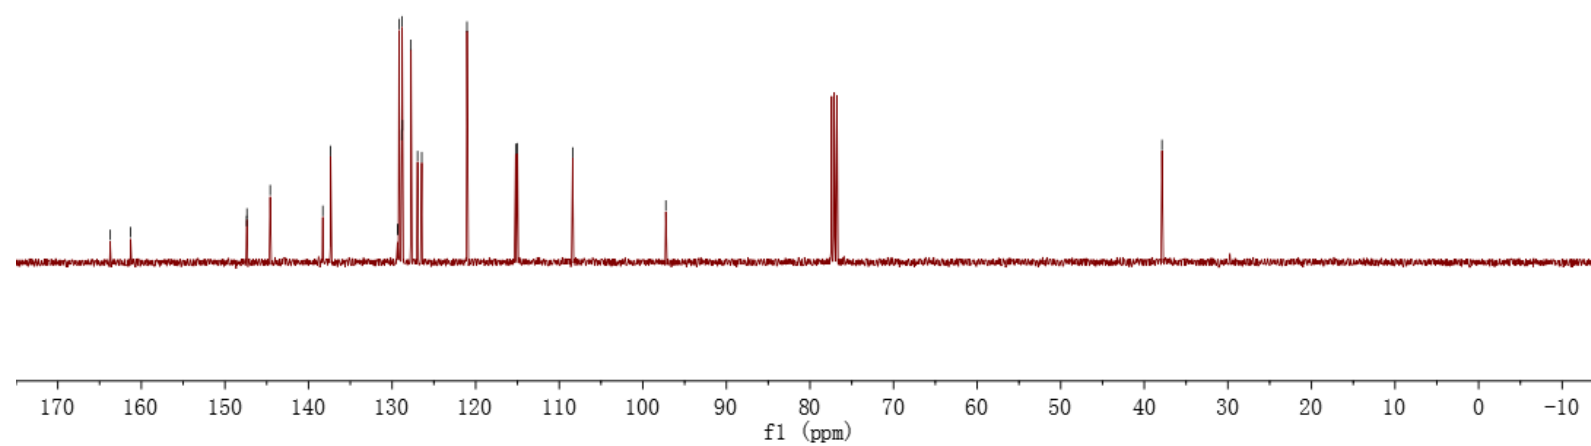

7.69  
7.67  
7.41  
7.40  
7.40  
7.38  
7.29  
7.27  
7.24  
7.22  
7.21  
7.08  
7.07  
7.06  
6.99  
6.99  
6.98  
6.97  
6.97  
6.95  
6.94  
6.71  
6.71  
6.70  
6.69  
5.10  
5.09  
5.08  
5.07  
4.95  
4.94

LL-140  
PROTON DMSO {D:\NMR400\02T2} nmr 57

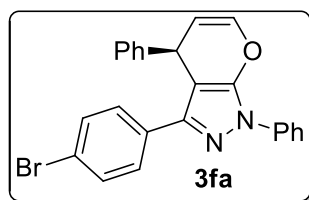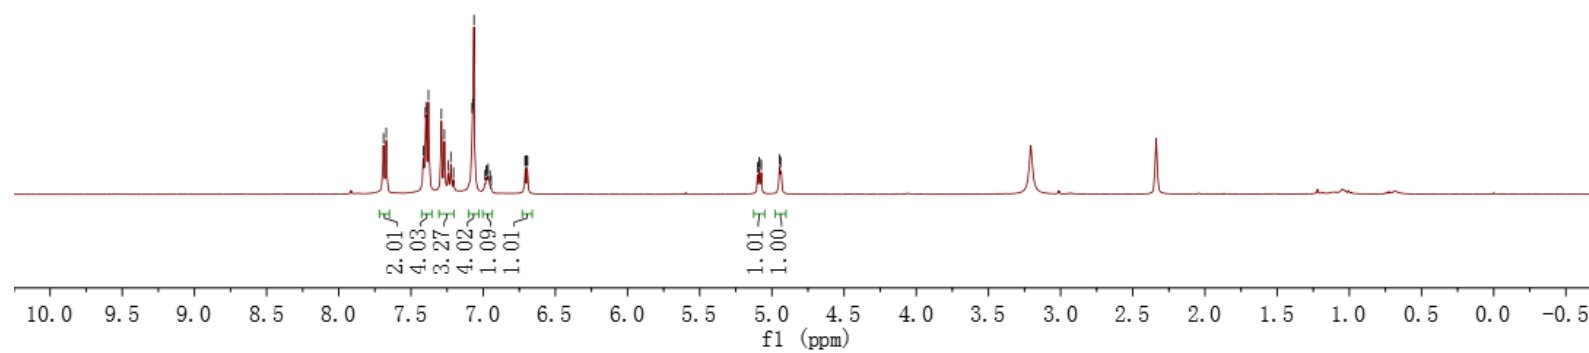

LL-140  
C13CPD DMSO {D:\NMR400\02T2} nmr 57

147.58  
146.41  
144.84  
138.04  
132.28  
131.62  
129.87  
129.01  
128.89  
128.15  
127.29  
127.15  
121.68  
121.39  
108.76  
-97.79

-36.97

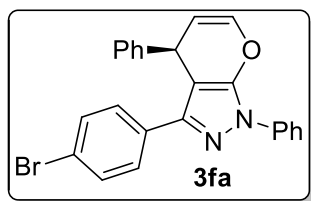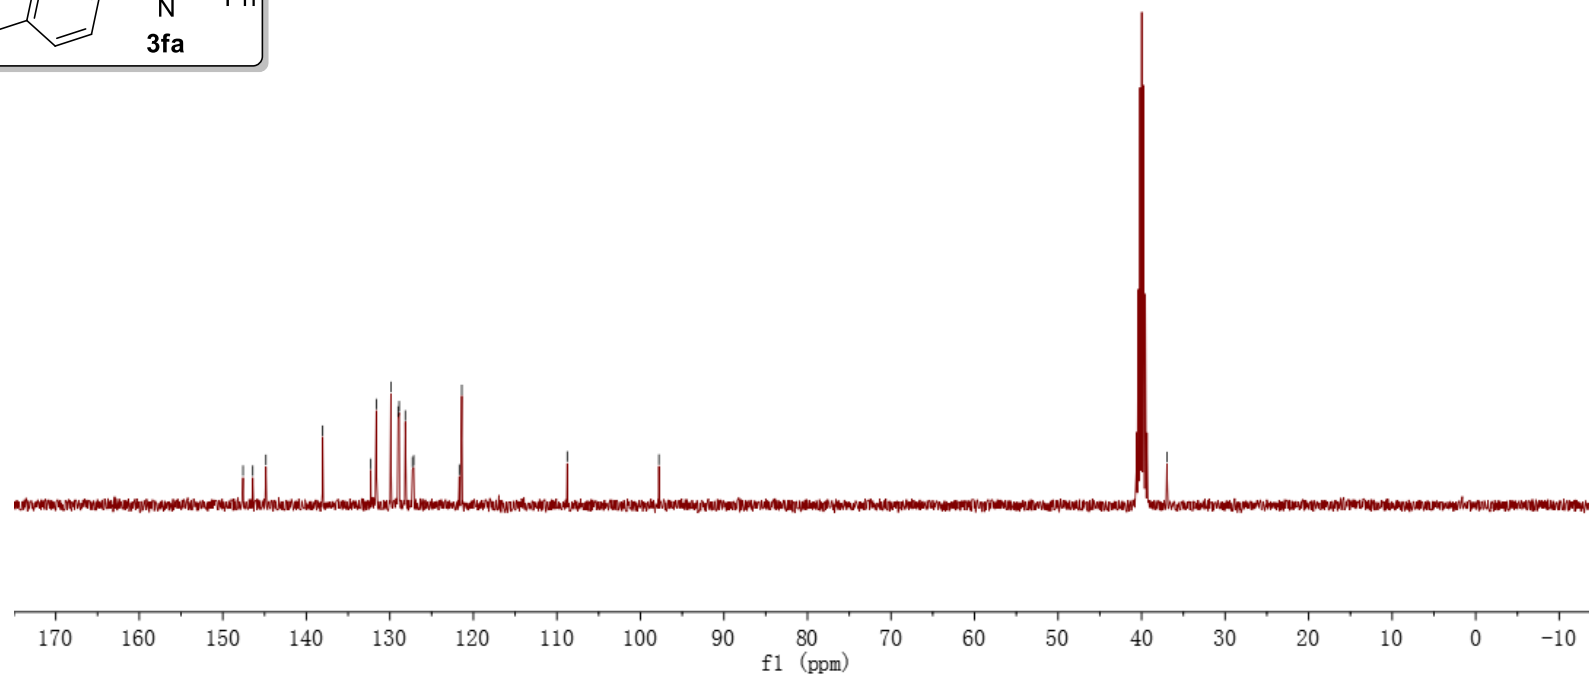

LL-172  
 PROTON CDC13 {D:\NMR400\02T2} nmr 39

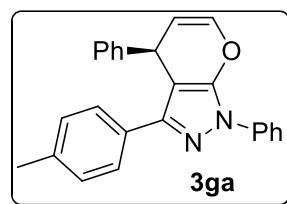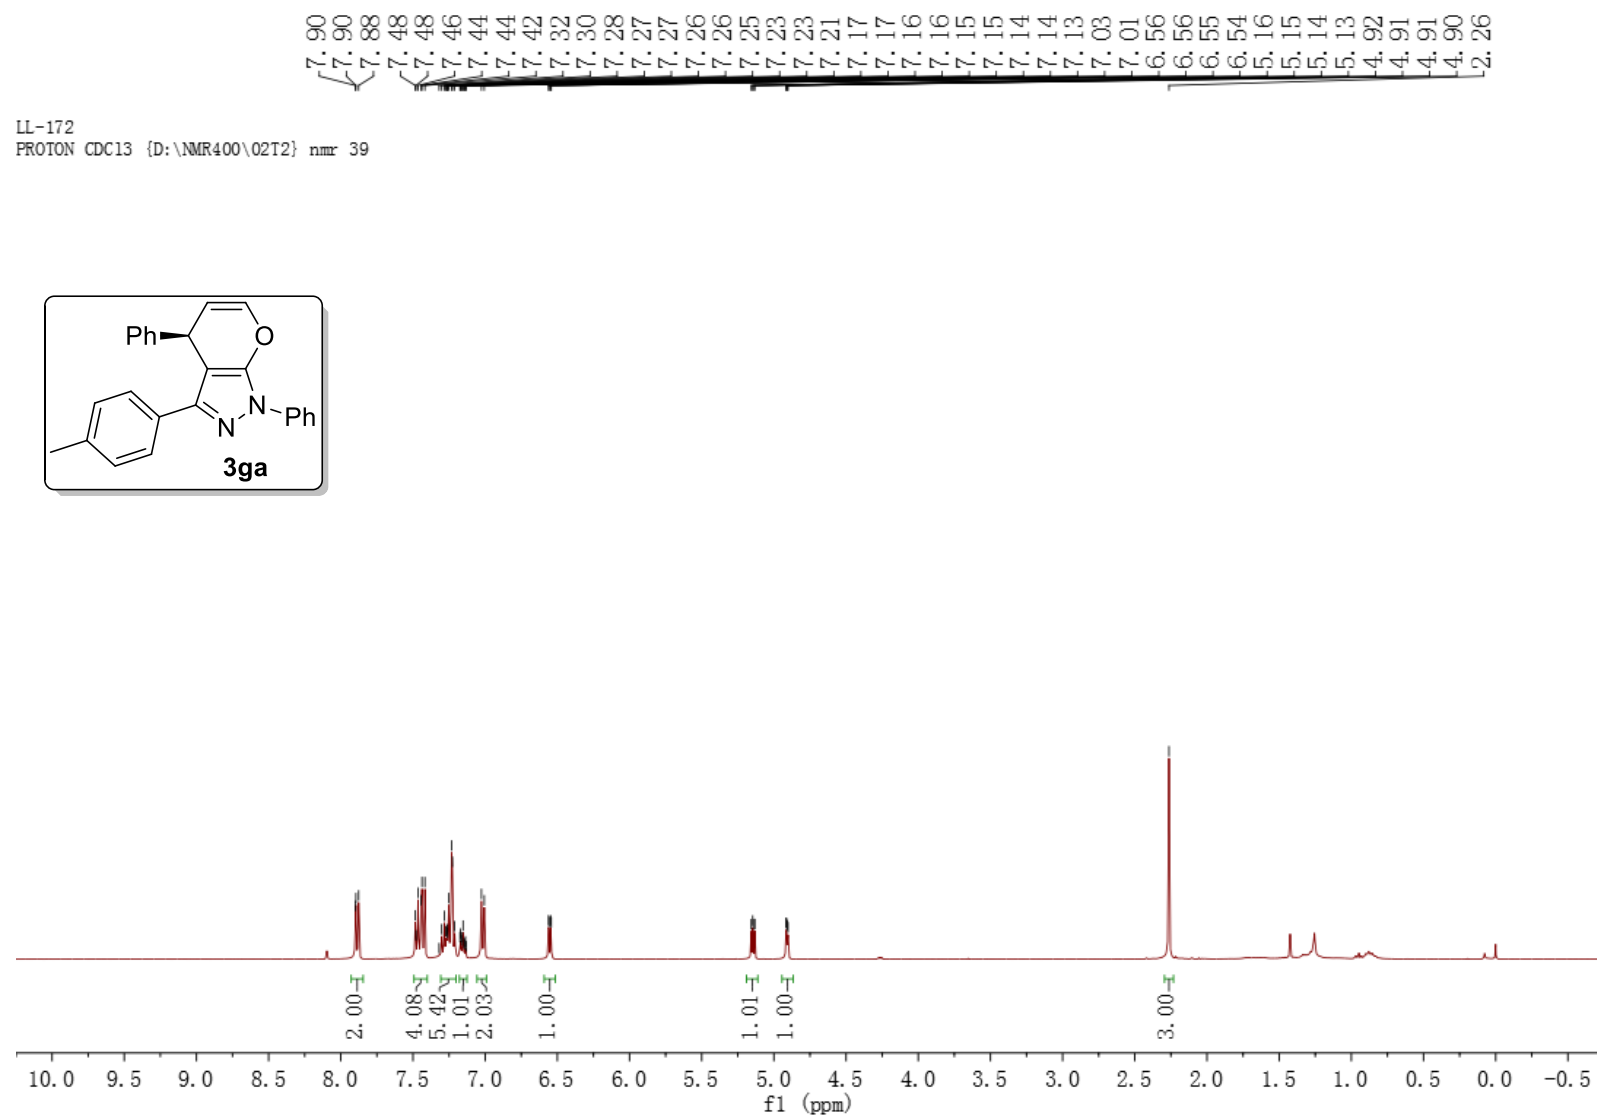

LL-172  
C13CPD CDC13 {D:\NMR400\02T2} nmr 39

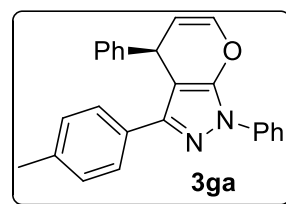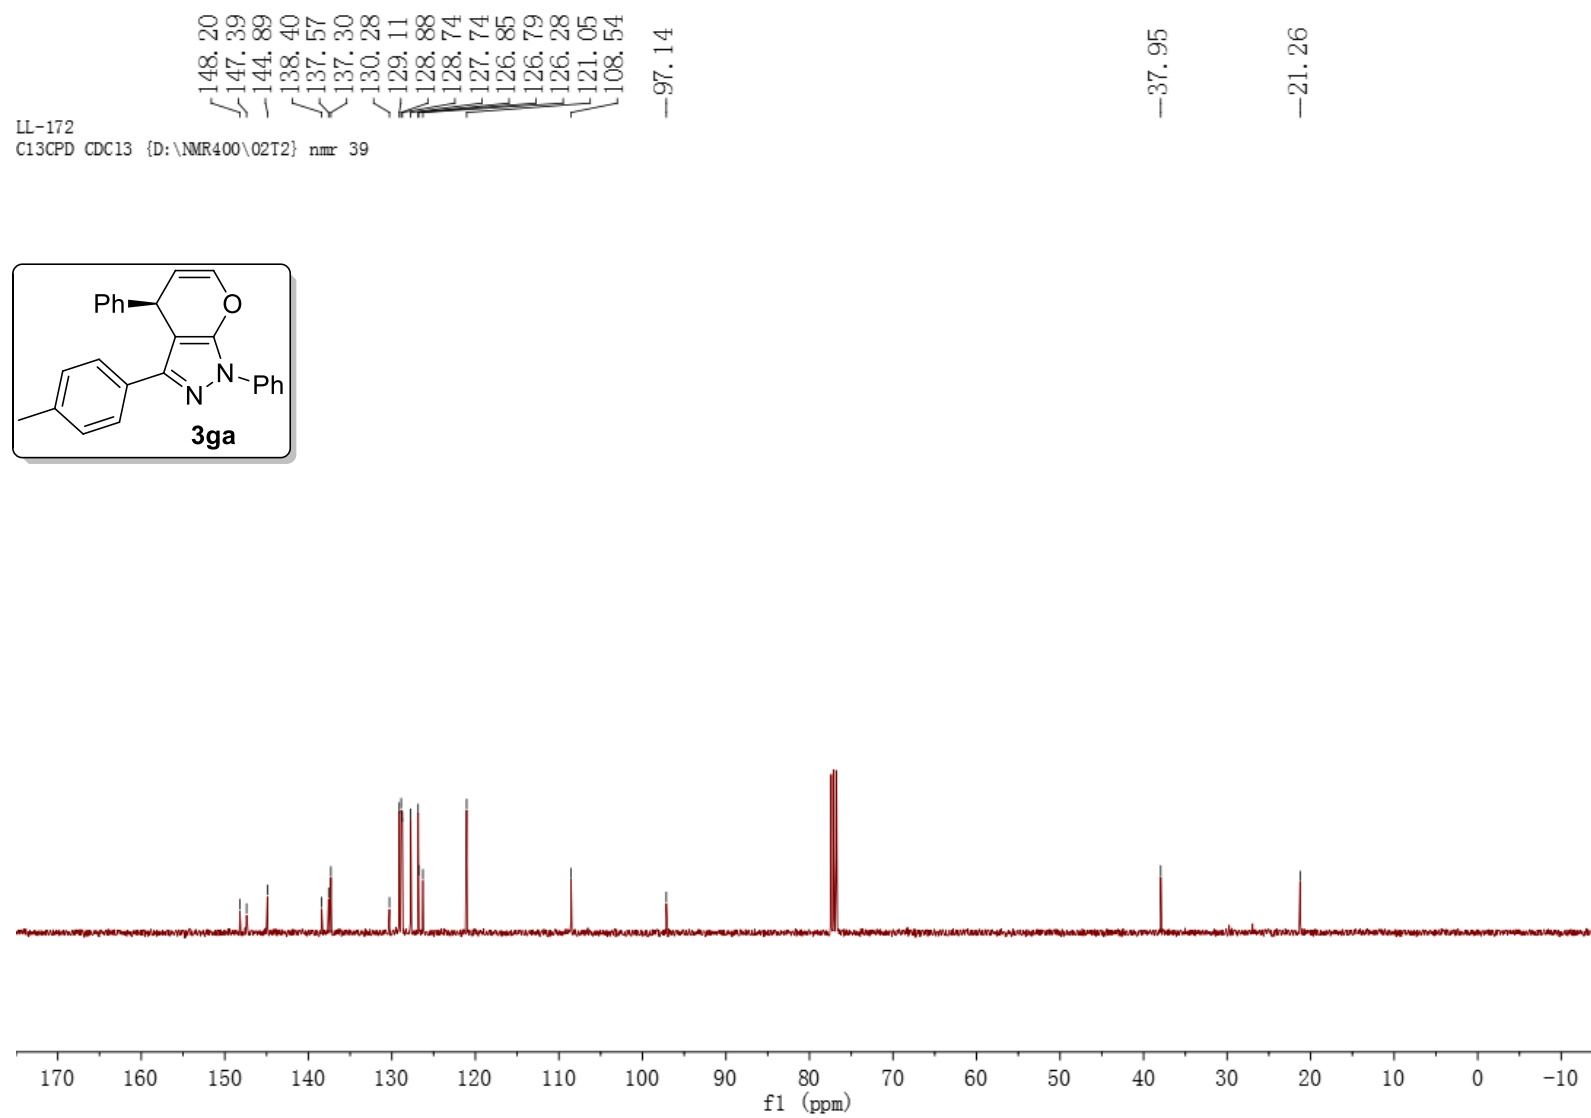

7.89  
7.89  
7.87  
7.48  
7.48  
7.47  
7.45  
7.45  
7.30  
7.28  
7.26  
7.24  
7.23  
7.23  
7.21  
7.18  
7.16  
6.75  
6.75  
6.73  
6.73  
6.72  
6.57  
6.56  
6.55  
6.55  
5.16  
5.15  
5.14  
5.13  
4.90  
4.90  
4.89  
4.89  
3.74

LL-176  
PROTON CDC13 {D:\NMR400\02T2} nmr 27

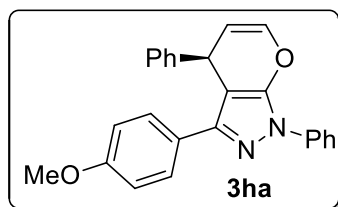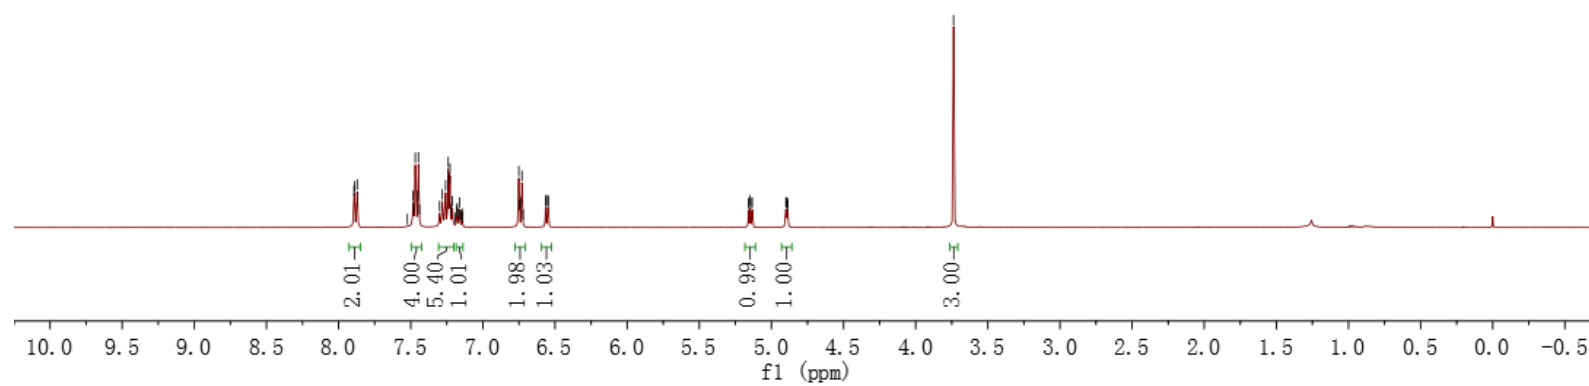

LL-176  
 C13CPD CDC13 {D:\NMR400\02T2} nmr 27

159.30  
 148.02  
 147.35  
 144.84  
 138.39  
 137.31  
 129.11  
 128.75  
 128.28  
 127.73  
 126.82  
 126.22  
 125.82  
 120.99  
 113.57  
 108.49

96.92

55.20

37.93

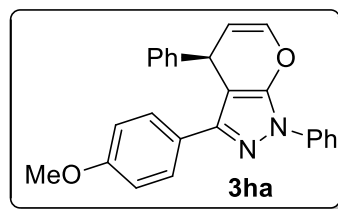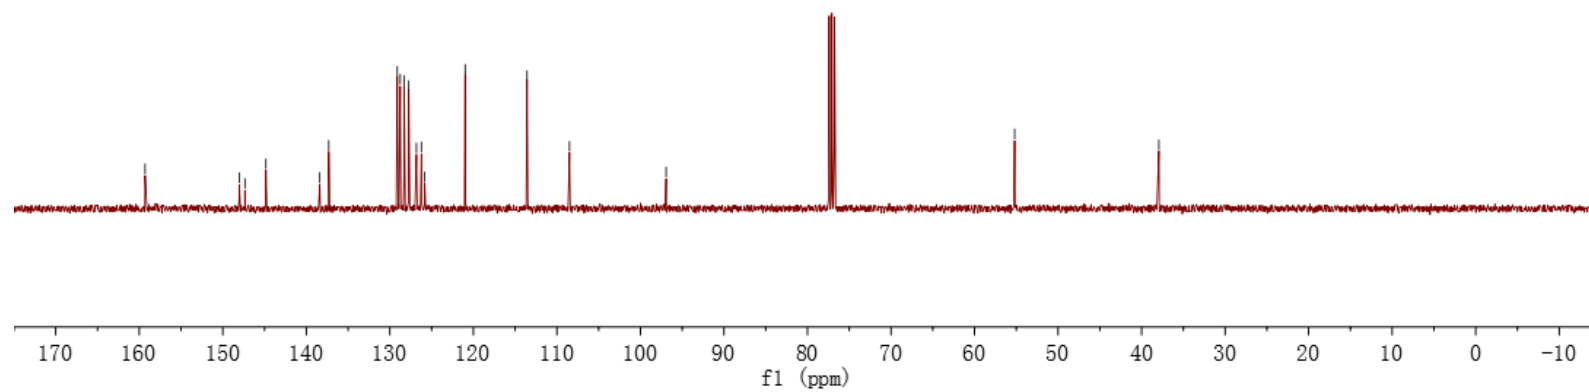

7.94  
7.92  
7.90  
7.89  
7.88  
7.87  
7.79  
7.74  
7.73  
7.72  
7.71  
7.58  
7.56  
7.56  
7.51  
7.49  
7.47  
7.41  
7.39  
7.39  
7.38  
7.38  
7.38  
7.37  
7.33  
7.32  
7.32  
7.31  
7.30  
7.30  
7.29  
7.27  
7.25  
7.22  
7.18  
7.18  
7.17  
7.16  
7.15  
7.14  
6.58  
6.58  
6.57  
6.56  
5.19  
5.18  
5.18  
5.17  
5.01  
5.01  
5.00  
5.00

LL-195  
PROTON CDC13 {D:\NMR400\02T2} nmr 37

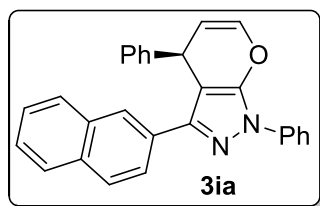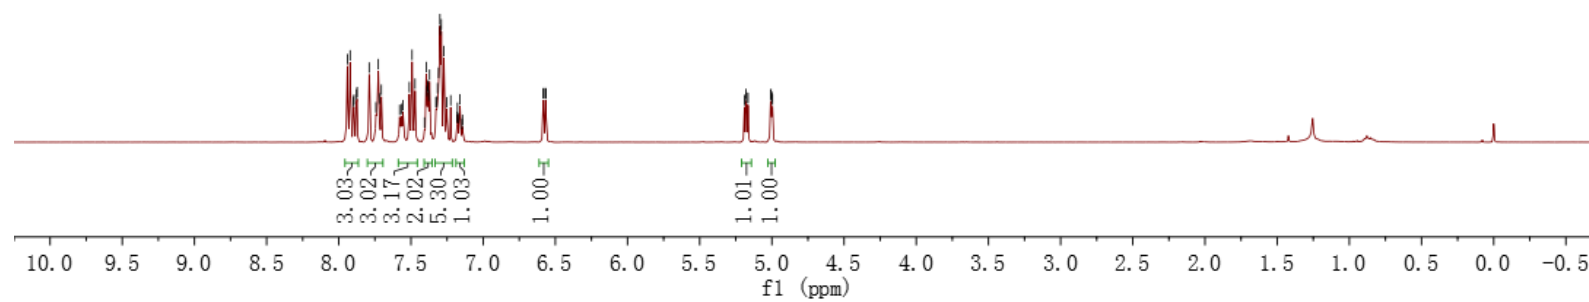



148.02  
 147.62  
 145.04  
 138.38  
 137.27  
 133.13  
 132.91  
 130.56  
 129.18  
 128.89  
 128.22  
 127.87  
 127.78  
 127.58  
 126.98  
 126.45  
 126.37  
 125.96  
 124.89  
 121.16  
 108.55  
 LL-195  
 C13CPD CDC13 {D:\NMR400\02T2} nmr 37

—97.57

—38.24

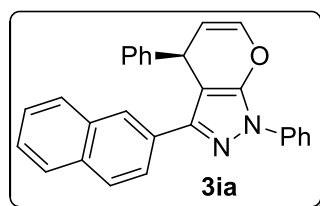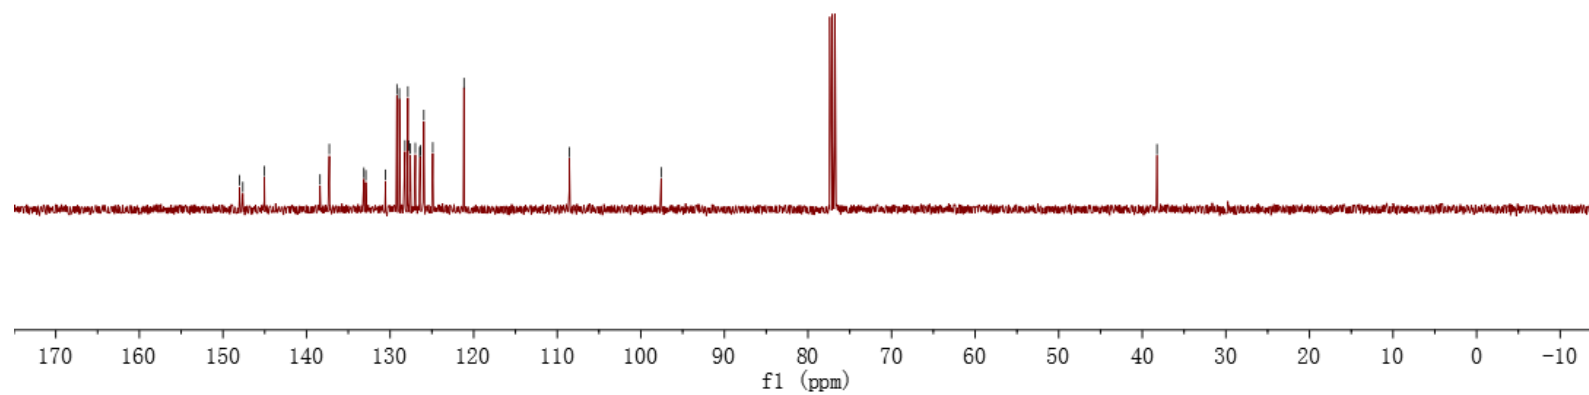

LL-180  
 PROTON CDC13 {D:\NMR400\02T2} nmr 30

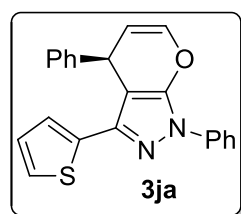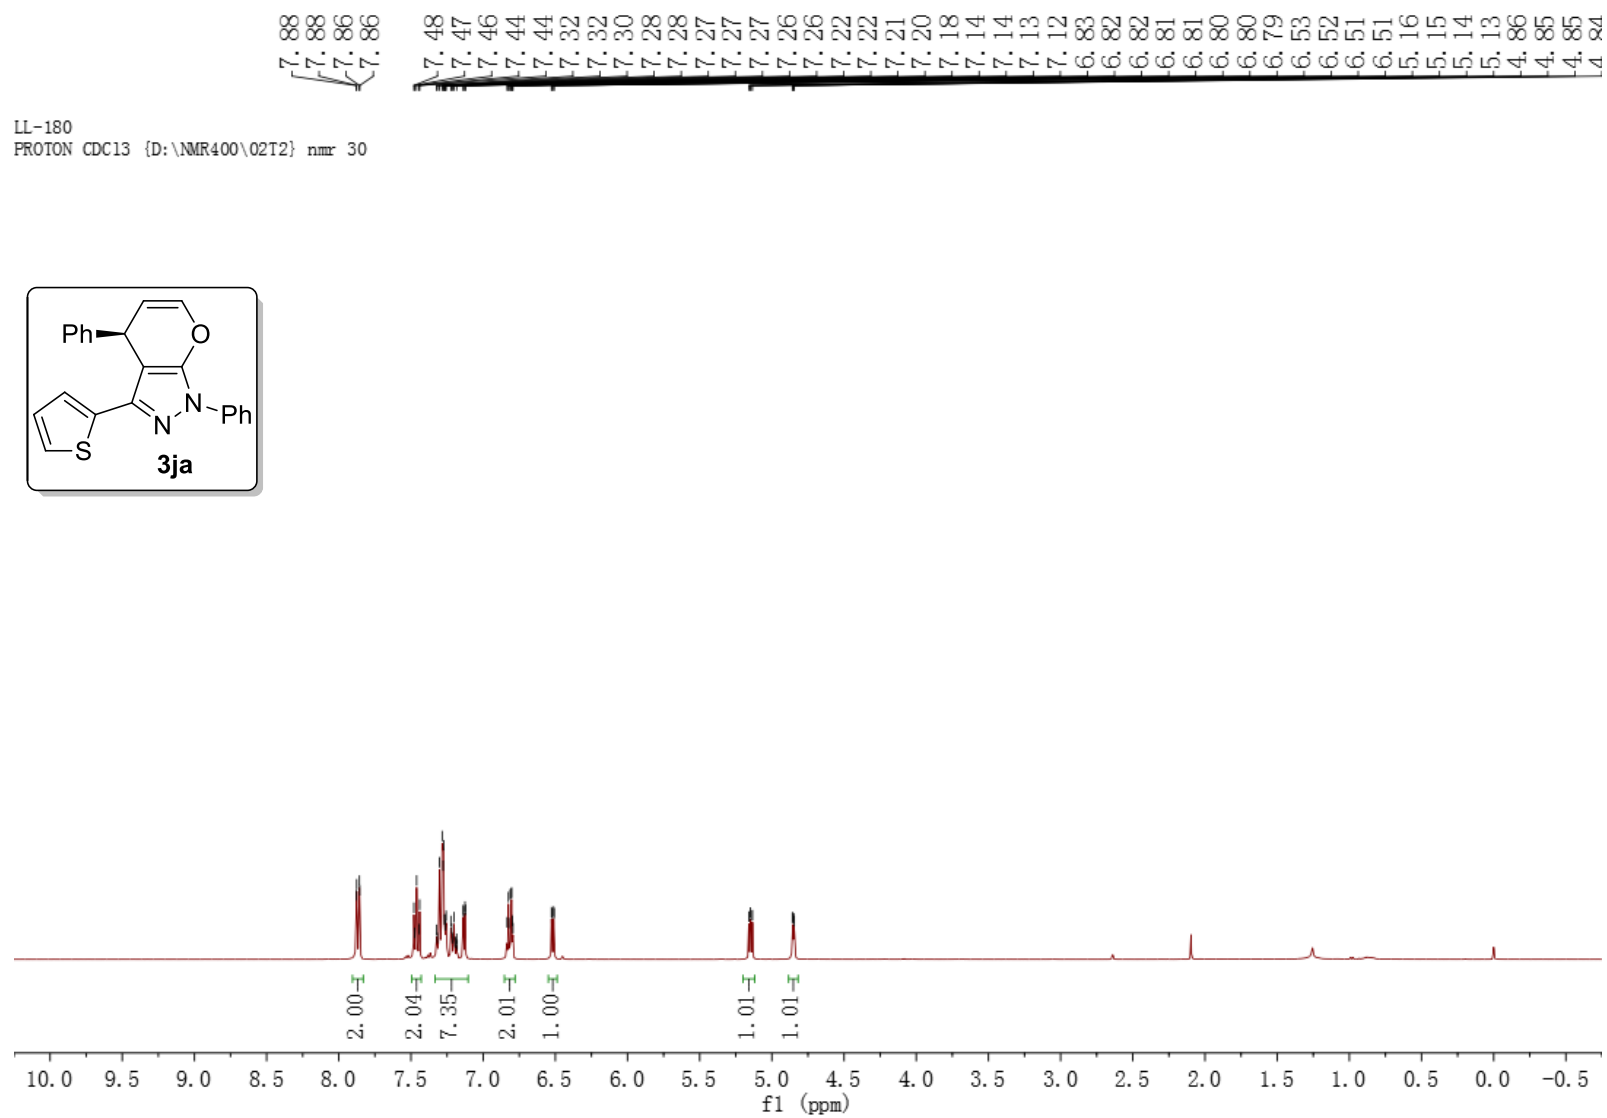

LL-180  
C13CPD CDC13 {D:\NMR400\02T2} nmr 52

147.60  
144.40  
143.70  
138.13  
137.19  
135.78  
129.15  
128.93  
127.72  
127.23  
126.98  
126.45  
125.40  
125.02  
121.07  
108.58  
-96.60

-37.53

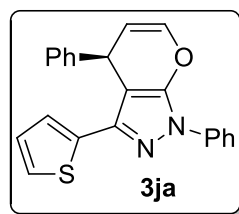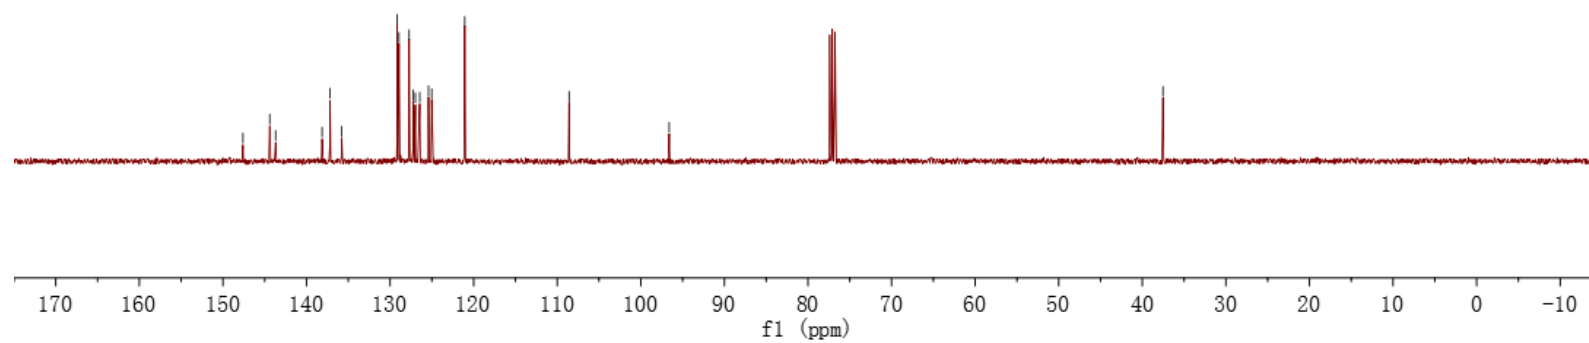

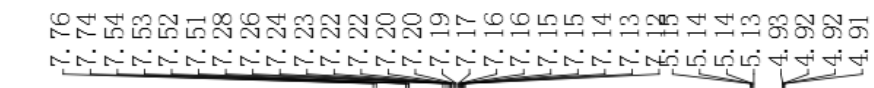

-2.39

LL-188  
PROTON CDC13 {D:\NMR400\02T2} nmr 10

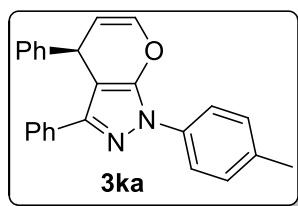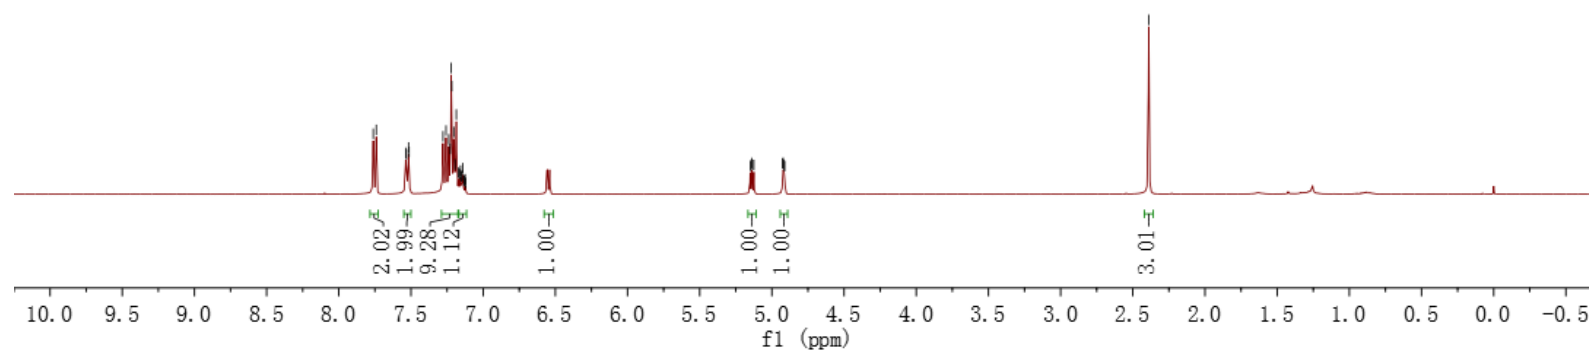

LL-188  
C13CPD CDC13 {D:\NMR400\02T2} nmr 6

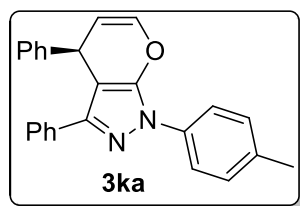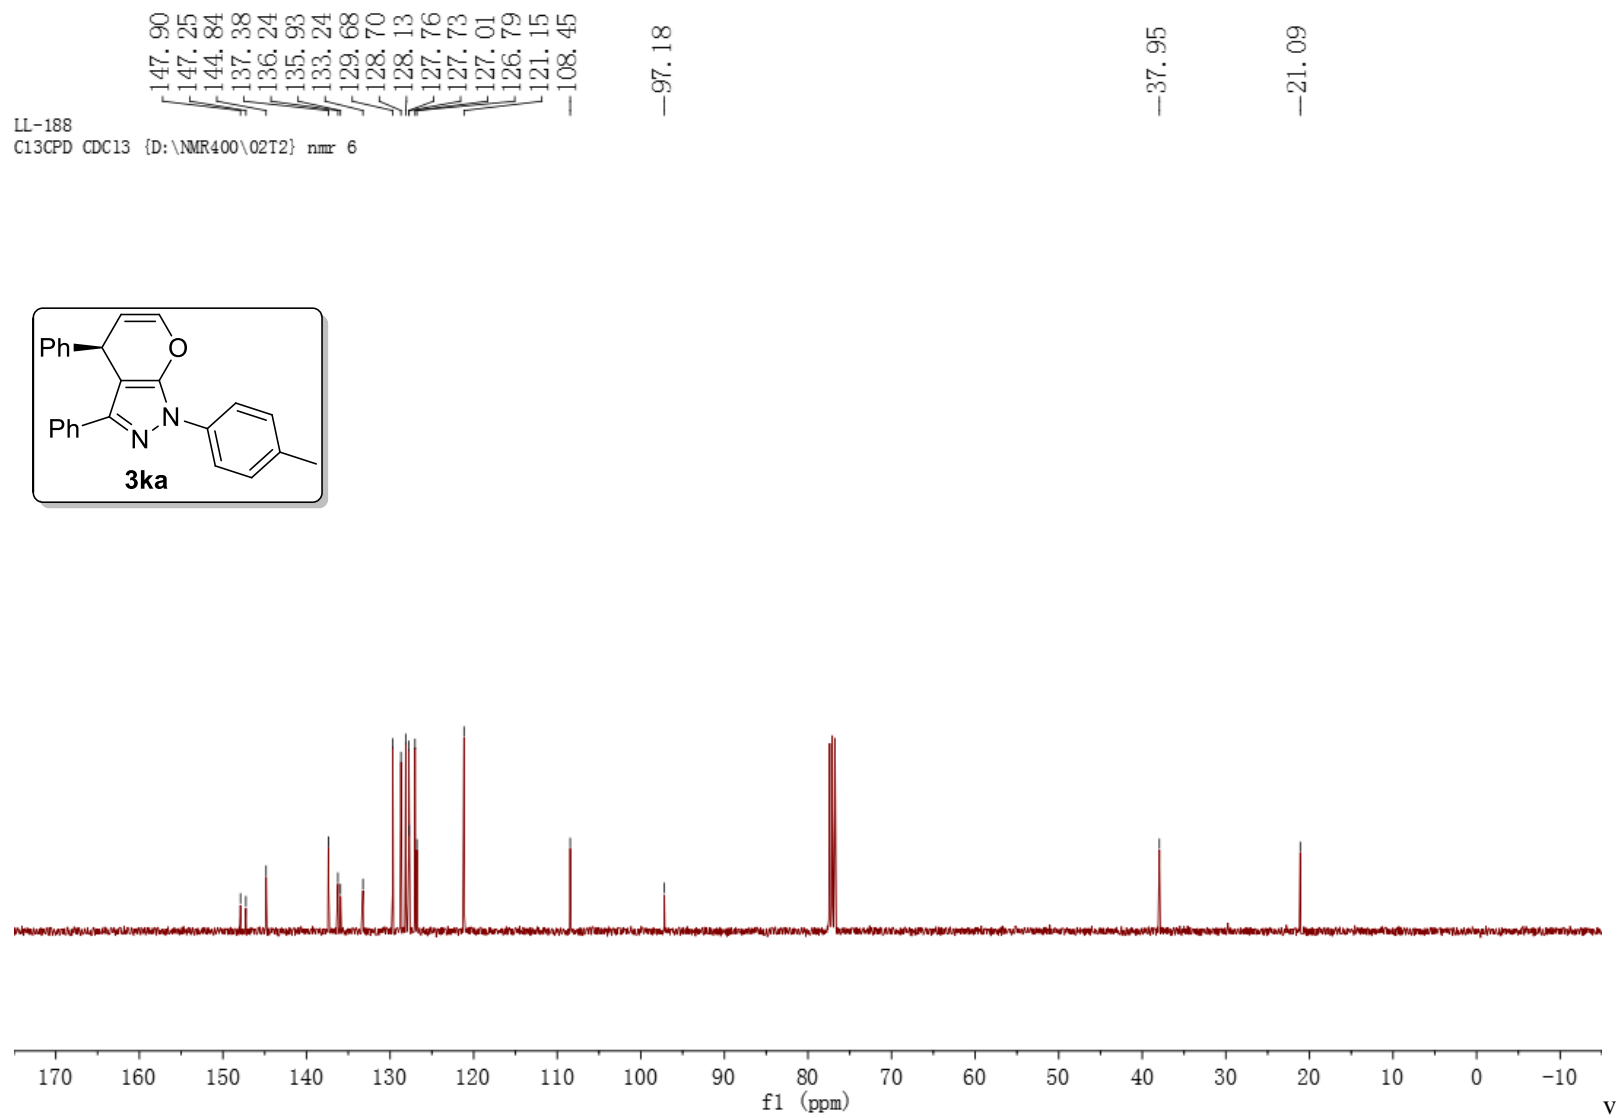

7.77  
7.77  
7.75  
7.53  
7.53  
7.51  
7.51  
7.24  
7.23  
7.22  
7.20  
7.18  
7.17  
7.17  
7.16  
7.16  
7.15  
7.14  
7.00  
6.98  
6.98  
6.54  
6.53  
6.53  
  
5.15  
5.14  
5.13  
5.12  
4.93  
4.92  
4.91  
  
— 3.83

LL-199  
PROTON CDC13 {D:\NMR400\02T2} nmr 5

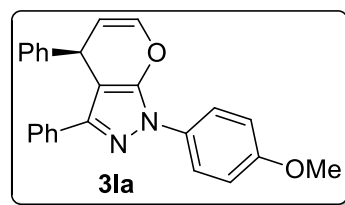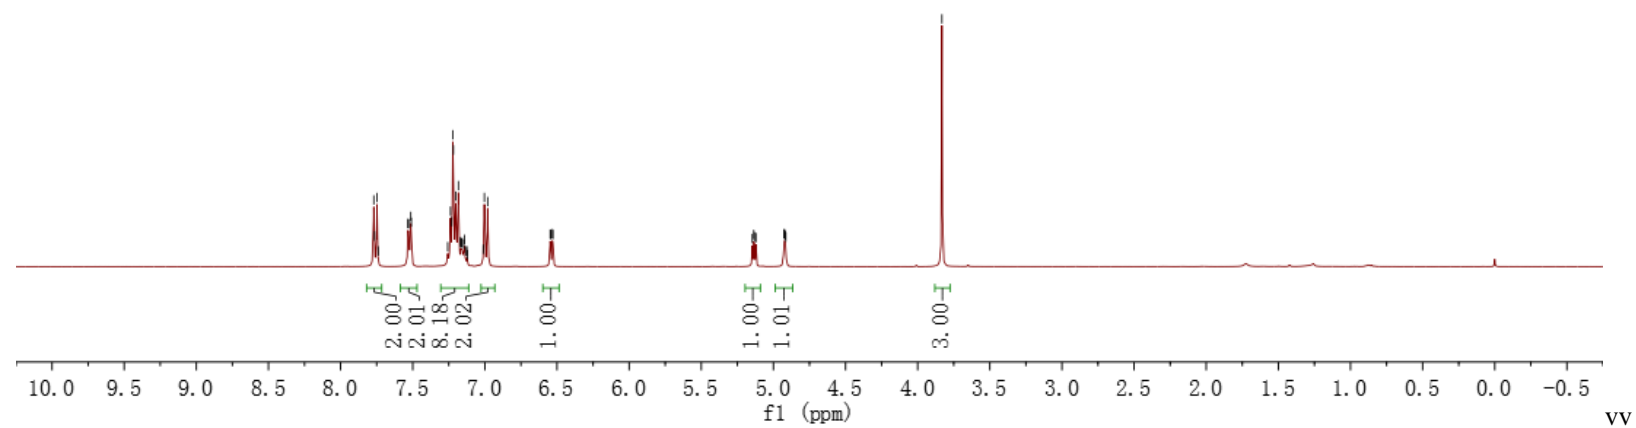

LL-199  
 C13CPD CDC13 {D:\NMR400\02T2} nmr 5

158.18  
 147.72  
 147.10  
 144.83  
 137.38  
 133.25  
 131.61  
 128.70  
 128.13  
 127.76  
 127.69  
 126.98  
 126.79  
 122.94  
 114.29  
 108.46  
 96.98  
 55.58  
 37.98

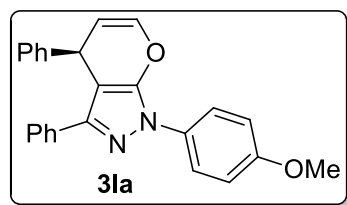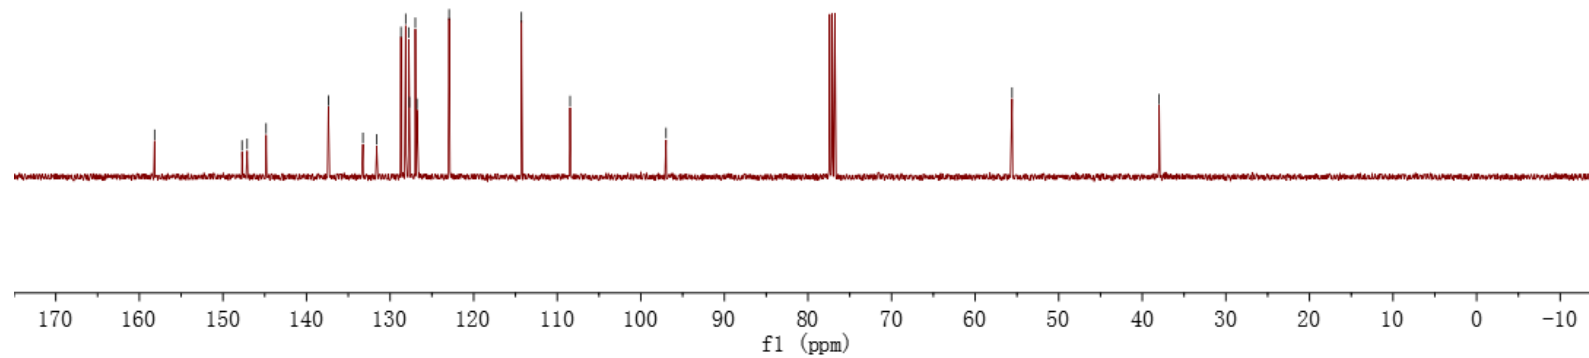

7.82  
7.80  
7.80  
7.59  
7.58  
7.57  
7.57  
7.52  
7.51  
7.51  
7.50  
7.50  
7.24  
7.22  
7.21  
7.20  
7.20  
6.58  
6.58  
6.56  
6.56  
5.18  
5.17  
5.16  
5.15  
4.92  
4.91  
4.91  
4.90

LL-183  
PROTON CDC13 {D:\NMR400\02T2} nmr 8

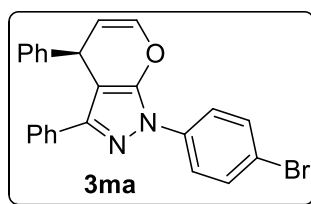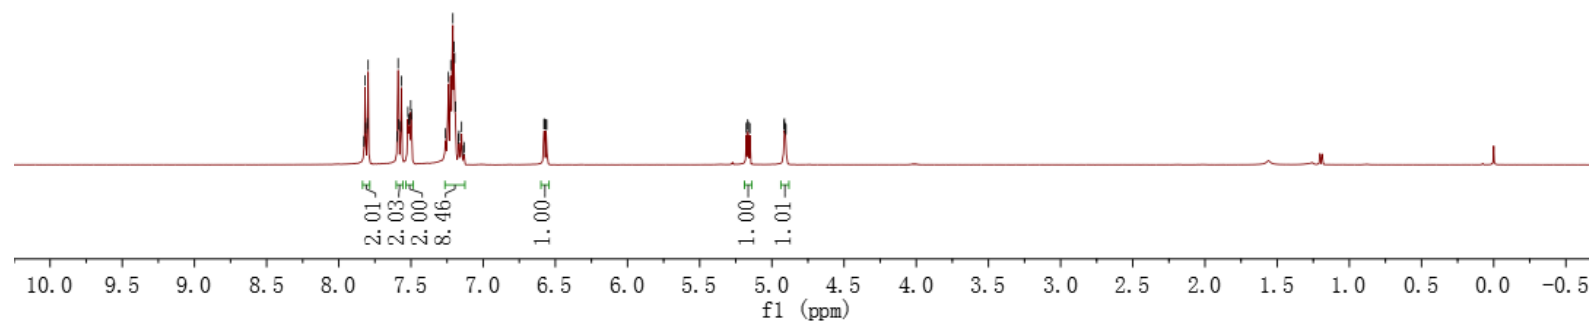



LL-183  
C13CPD CDC13 {D:\NMR400\02T2} nmr 8

148.55  
147.42  
144.54  
137.48  
137.27  
132.88  
132.16  
128.74  
128.19  
128.00  
127.73  
127.03  
126.89  
122.20  
119.48  
108.59  
-97.71  
-37.84

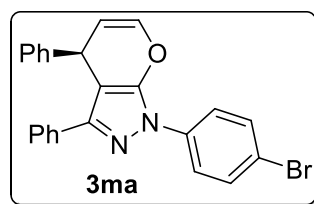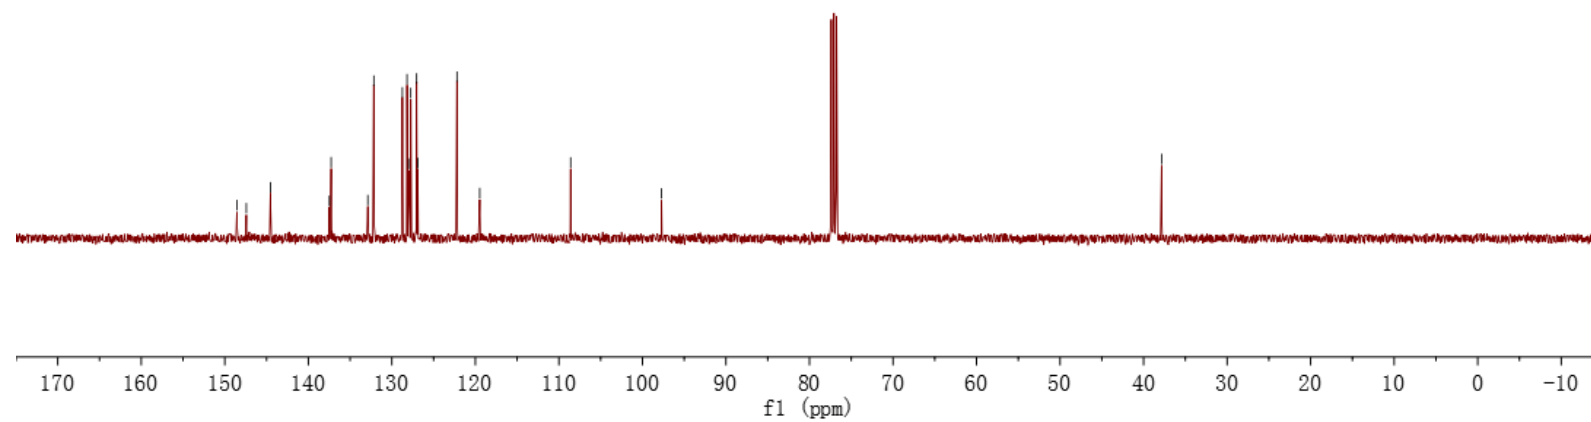

7.44  
7.43  
7.42  
7.42  
7.41  
7.23  
7.21  
7.19  
7.19  
7.18  
7.17  
7.17  
7.16  
7.16  
7.15  
7.14  
7.14  
7.13  
7.12  
7.12  
7.12  
7.11  
7.11  
7.10  
7.09  
6.49  
6.48  
6.47  
6.47  
5.07  
5.06  
5.06  
5.05  
4.85  
4.84  
4.84  
4.83  
4.18  
2.06  
2.06  
2.04  
2.03  
2.02  
2.01  
1.98  
1.95  
1.94  
1.93  
1.90  
1.90  
1.44  
1.43  
1.42  
1.41  
1.40  
1.31  
1.27  
1.26

LL-269  
PROTON CDC13 {D:\NMR400\02T2} nmr 4

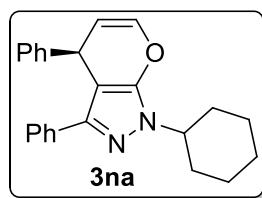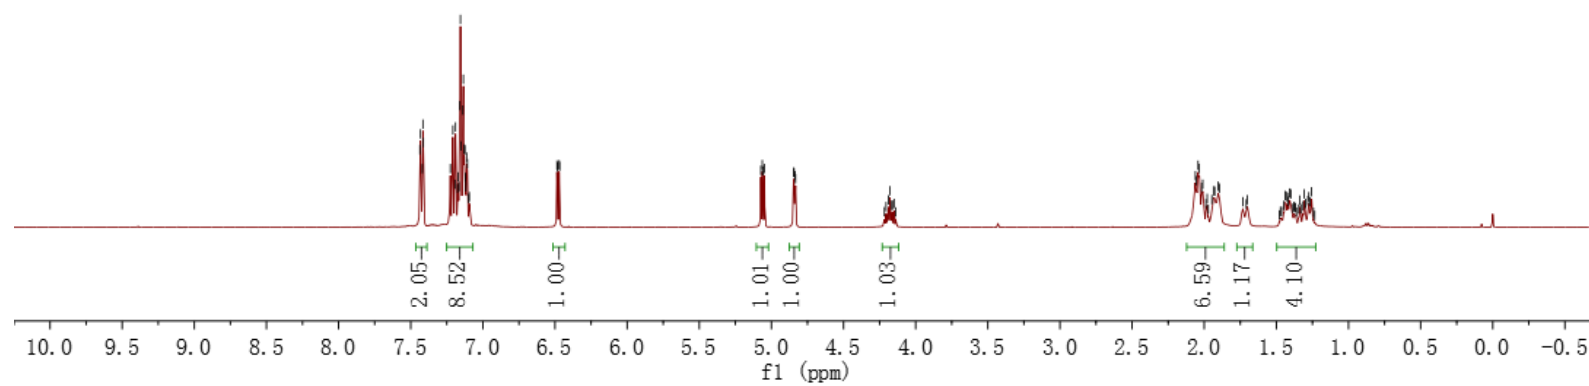

LL-269  
C13CPD CDC13 {D:\NMR400\02T2} nmr 4

146.68  
145.98  
145.23  
137.23  
133.92  
128.59  
128.04  
127.71  
127.11  
126.76  
126.59  
-108.42  
-95.44  
-57.46  
-37.97  
32.14  
32.09  
25.73  
25.31

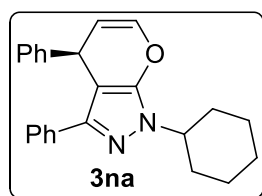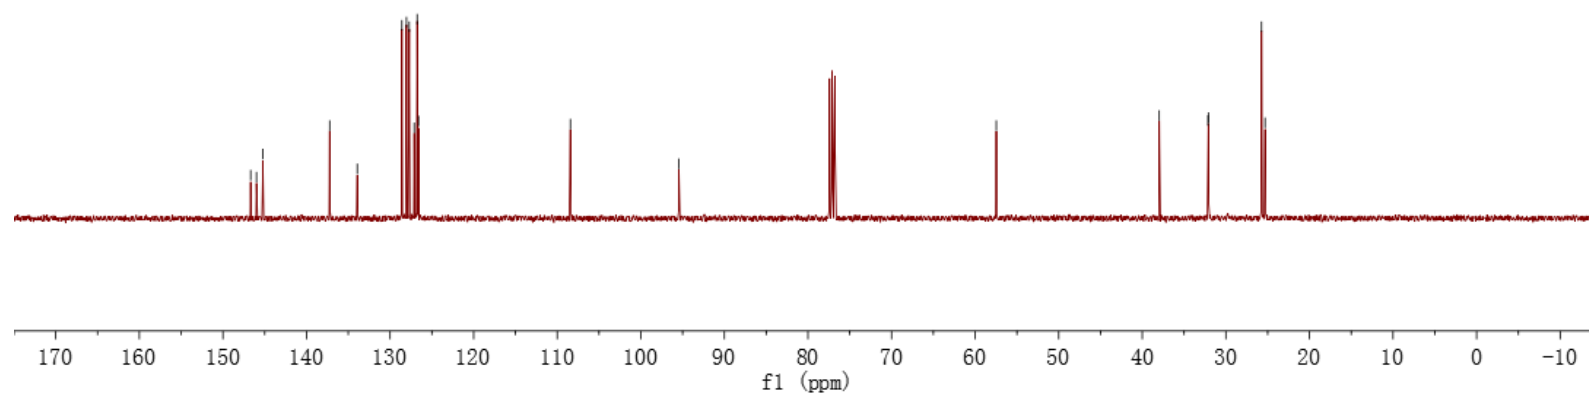

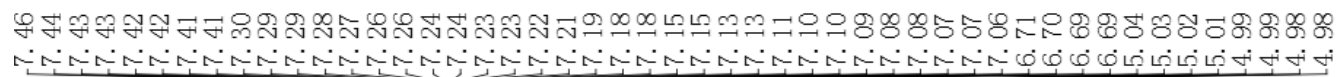

LL-256  
PROTON DMSO {D:\NMR400\02T2} nmr 19

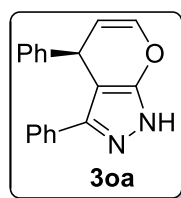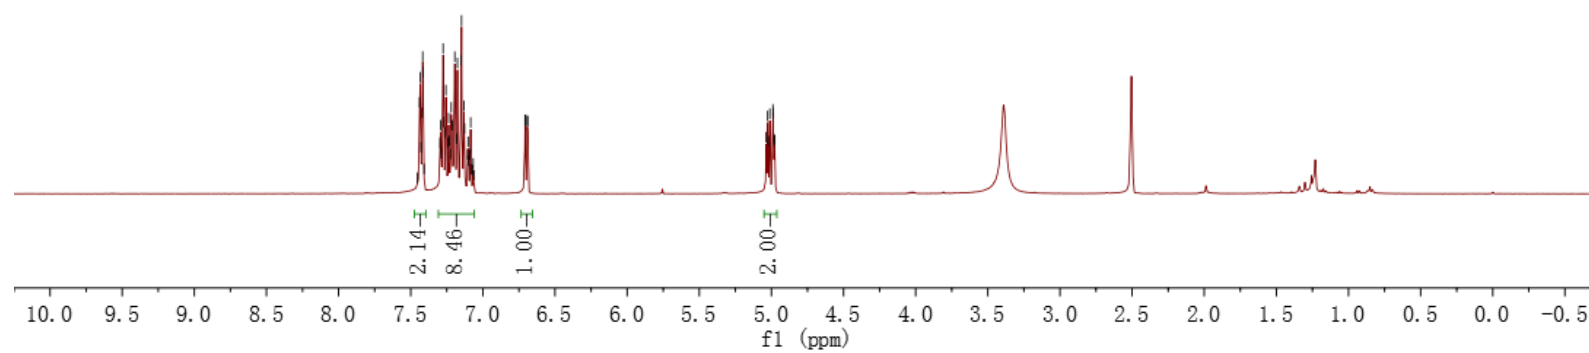

LL-256  
C13CPD DMSO {D:\NMR400\02T2} nmr 19

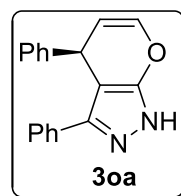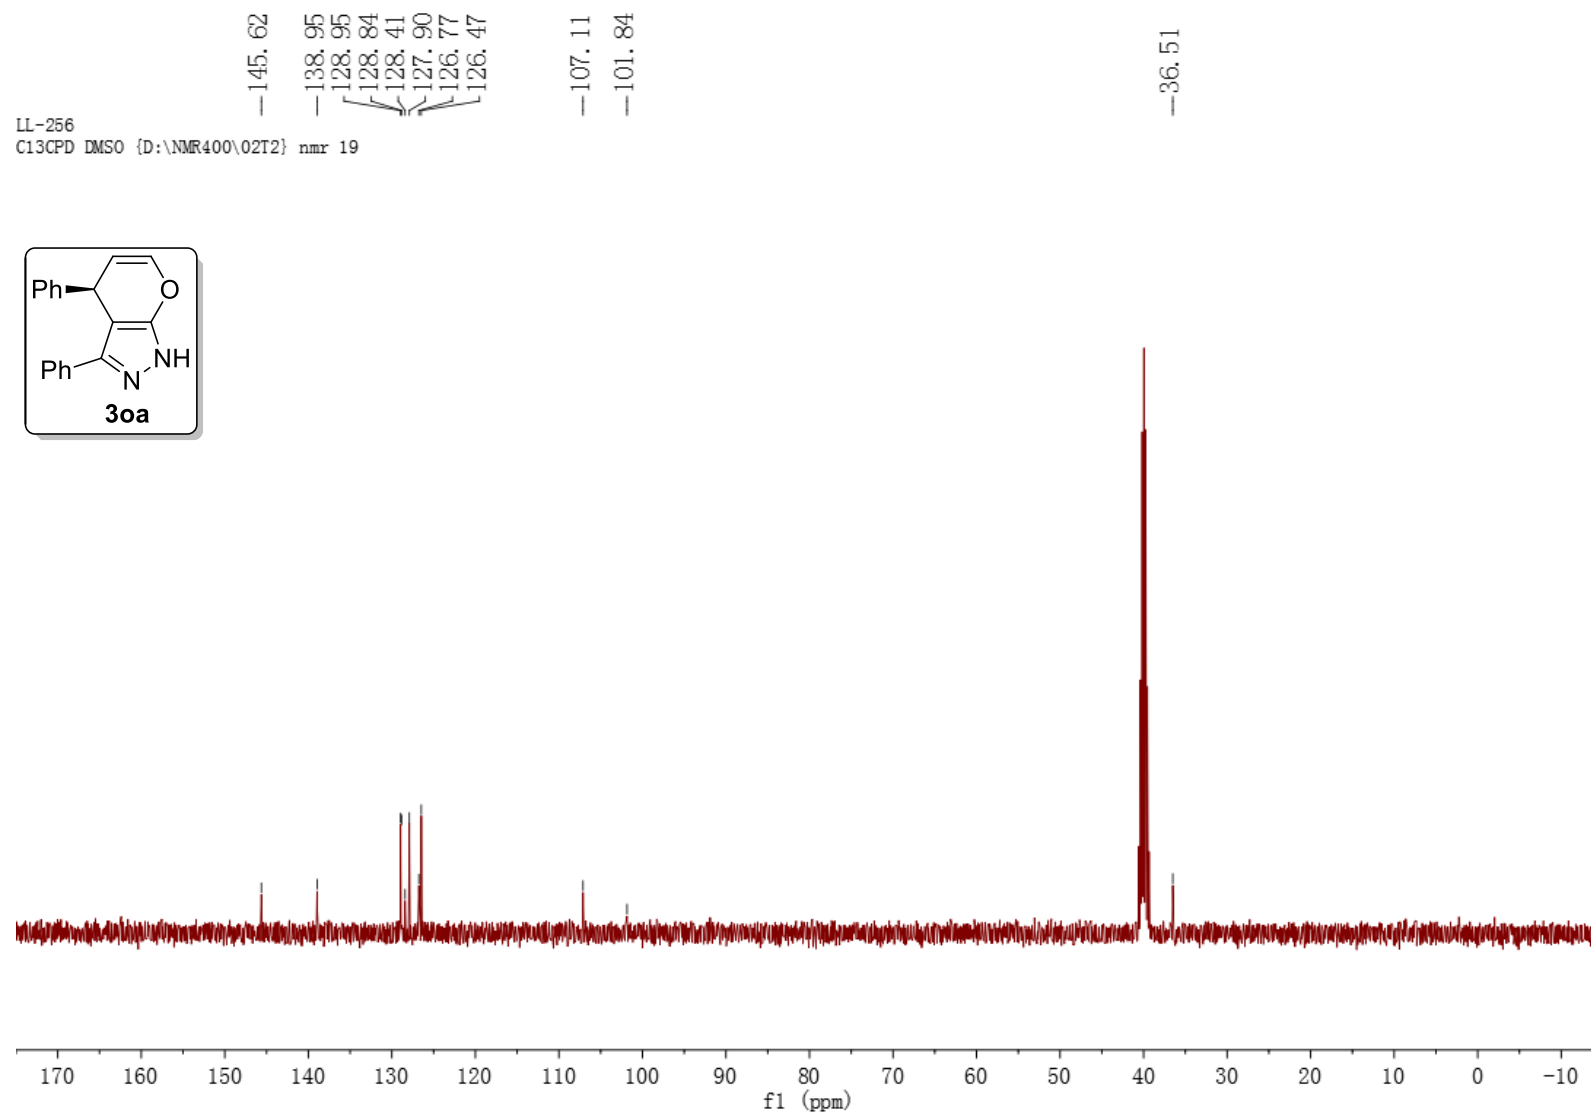

7.91  
7.89  
7.55  
7.55  
7.53  
7.48  
7.47  
7.45  
7.34  
7.33  
7.33  
7.32  
7.32  
7.31  
7.30  
7.28  
7.27  
7.23  
7.22  
7.22  
7.20  
7.19  
7.17  
7.16  
7.15  
7.14  
7.13  
7.12  
7.11  
7.11  
7.10  
7.10  
7.09  
7.08  
7.08  
7.06  
7.06  
7.05  
7.04  
7.04  
7.03  
6.55  
6.54  
6.53  
6.53  
5.50  
5.50  
5.49  
5.49  
5.25  
5.24  
5.23  
5.22  
4.64

LL-233  
PROTON CDC13 {D:\NMR400\02T2} nmr 33

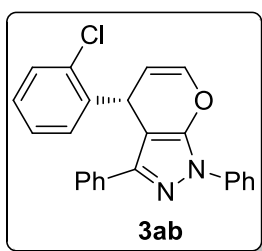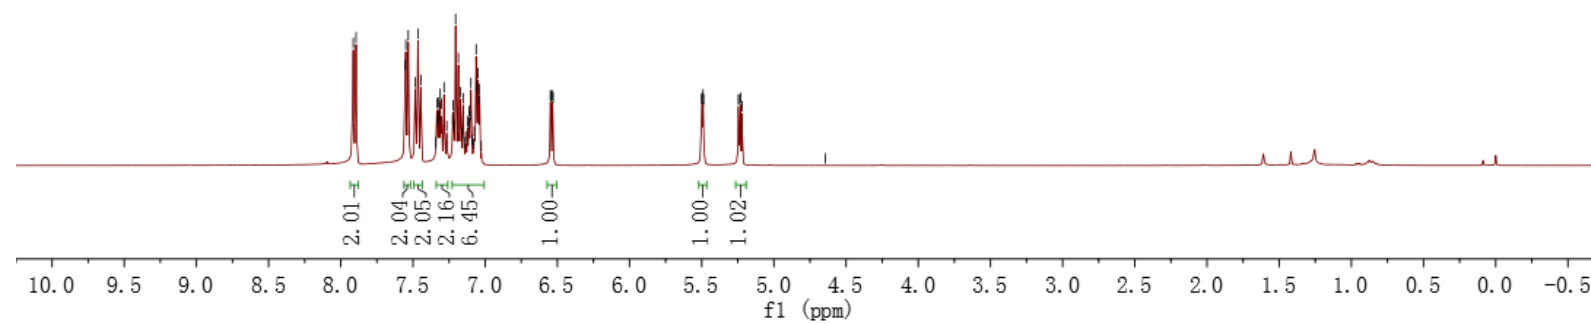

—34.48

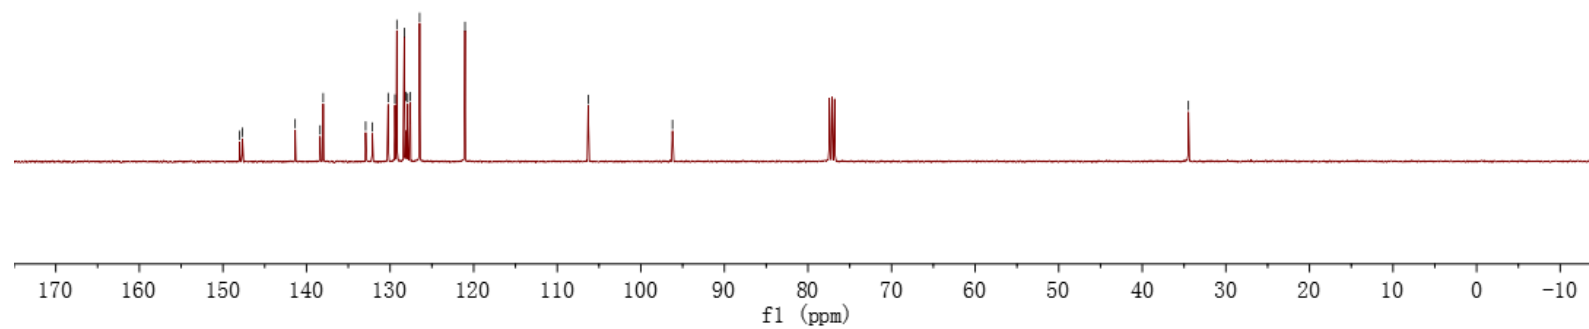

LL-205  
 PROTON CDC13 {D:\NMR400\02T2} nmr 24

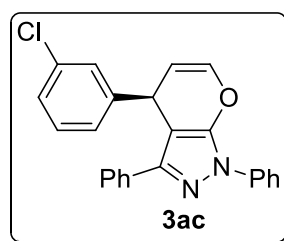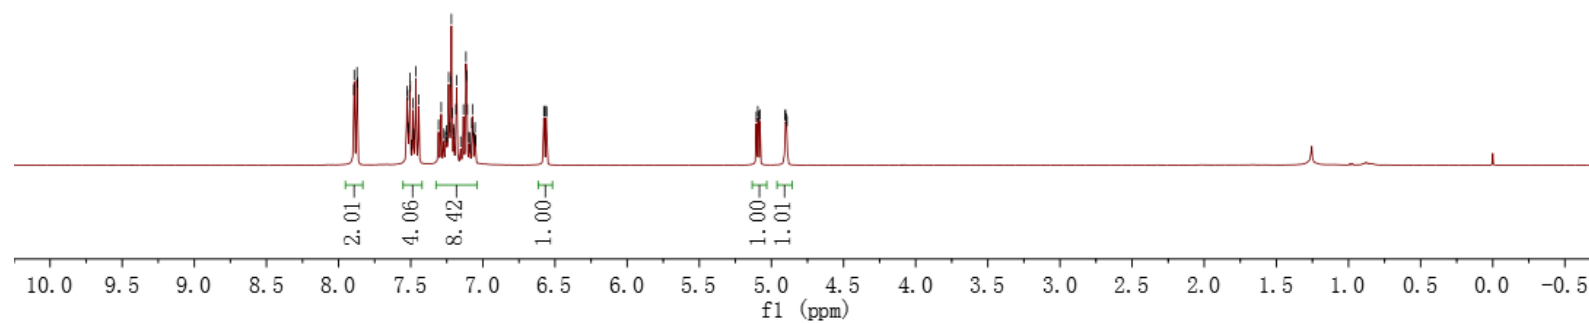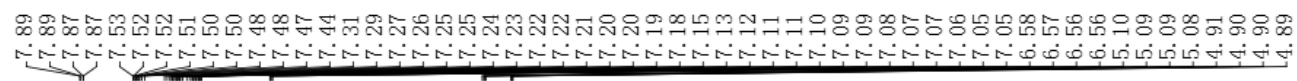



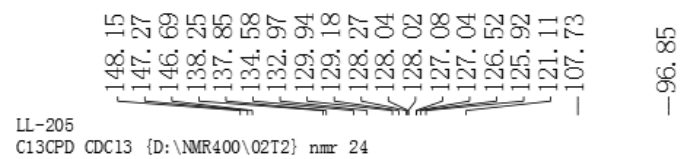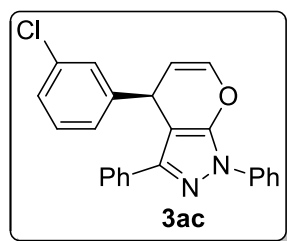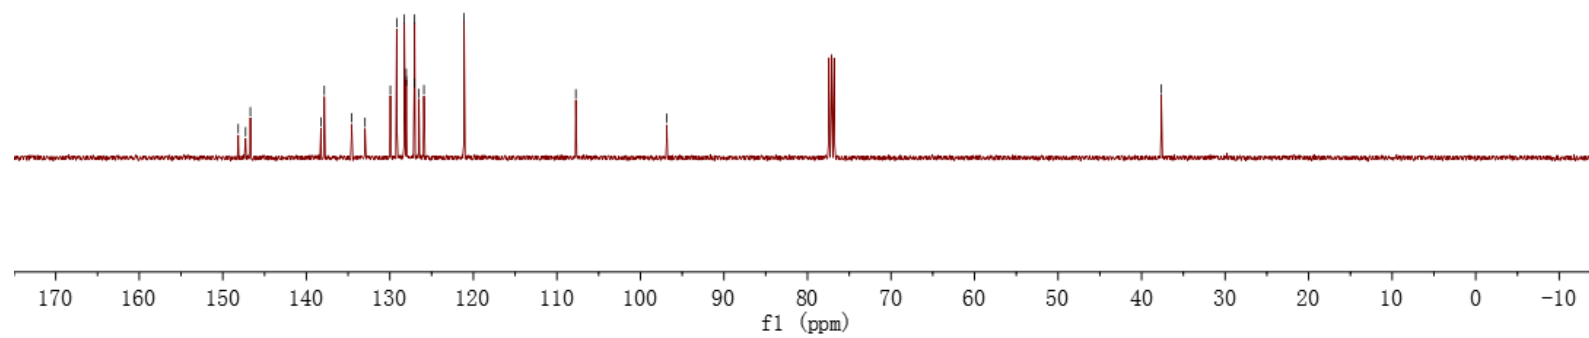

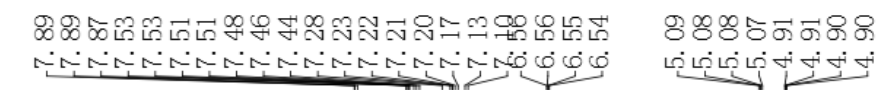

LL-220  
 PROTON CDC13 {D:\NMR400\02T2} nmr 31

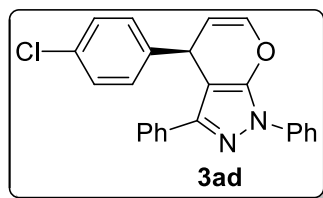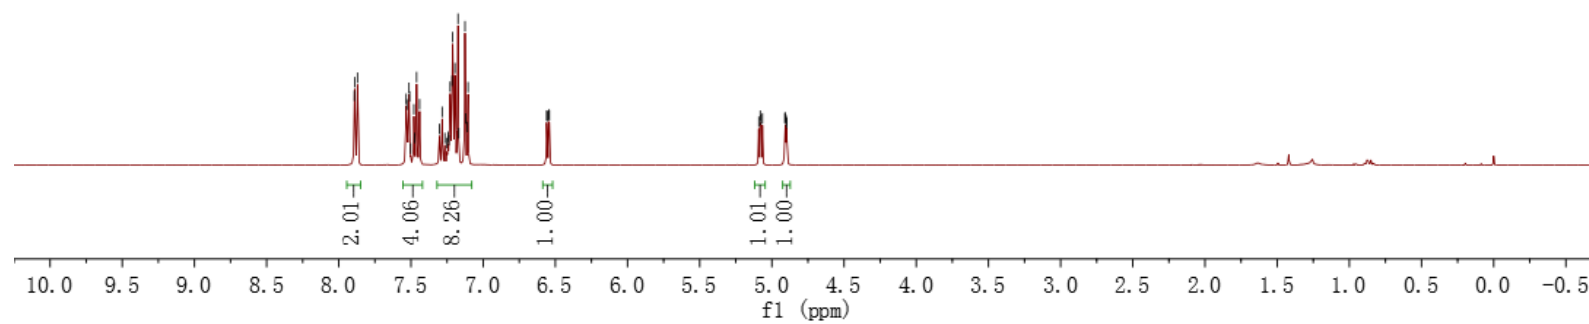

LL-220  
C13CPD CDC13 {D:\NMR400\02T2} nmr 31

148.09  
147.30  
143.24  
138.30  
137.65  
133.02  
132.53  
129.17  
129.09  
128.86  
128.27  
128.00  
126.97  
126.48  
121.06  
-108.00

-96.99

-37.36

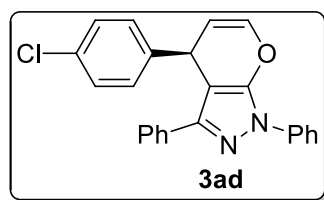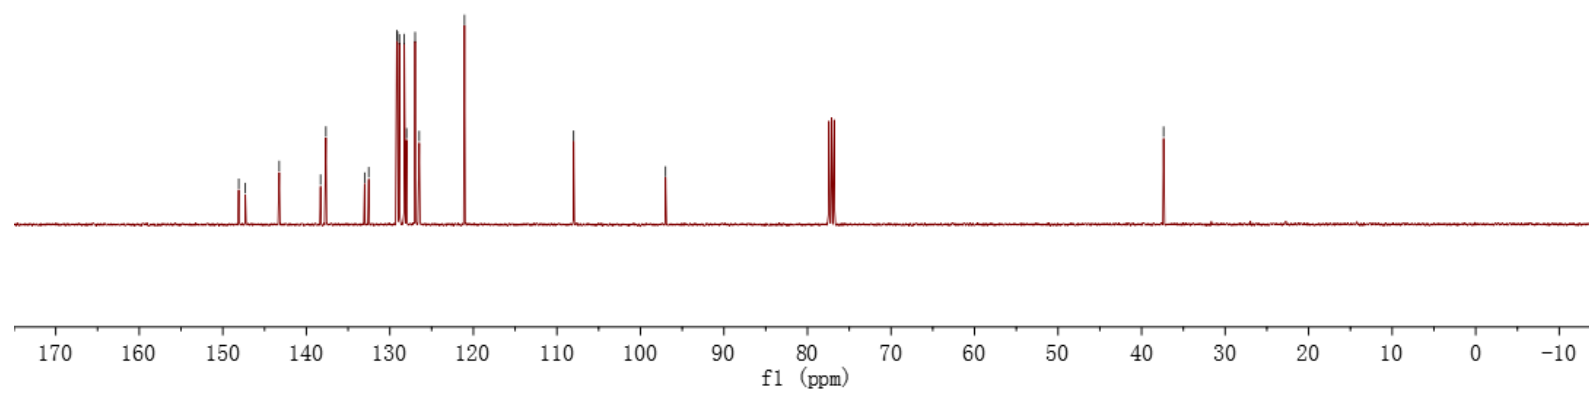

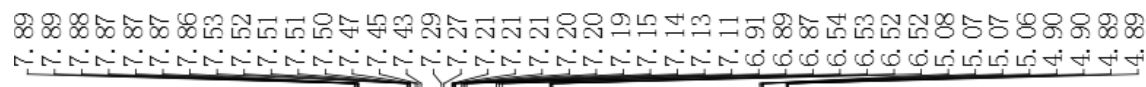

LL-208  
 PROTON CDC13 {D:\NMR400\02T2} nmr 36

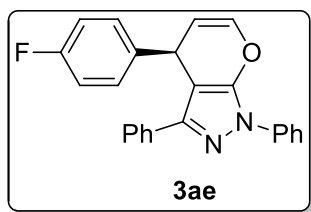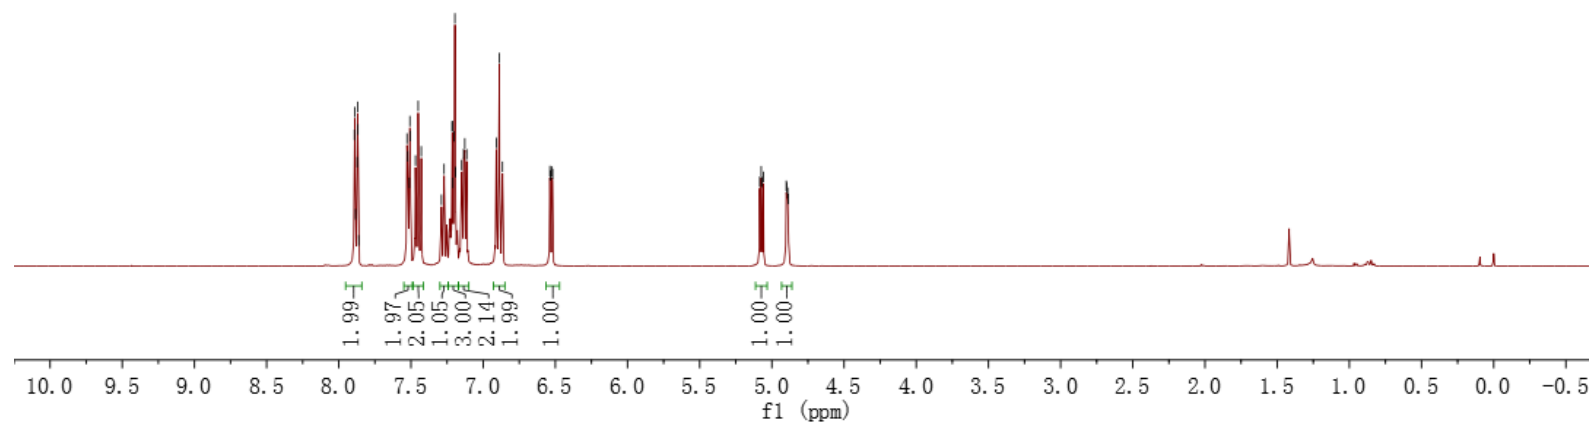

LL-208  
 C13CPD CDC13 {D:\NMR400\02T2} nmr 36

162.86  
 160.43  
 148.17  
 147.29  
 140.56  
 140.53  
 138.33  
 137.47  
 133.08  
 129.30  
 129.22  
 129.19  
 128.23  
 127.97  
 127.05  
 126.47  
 121.07  
 115.63  
 115.41  
 108.28  
 97.37

37.21

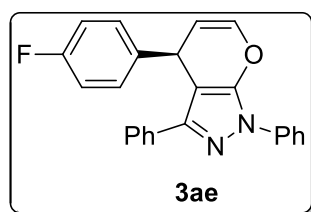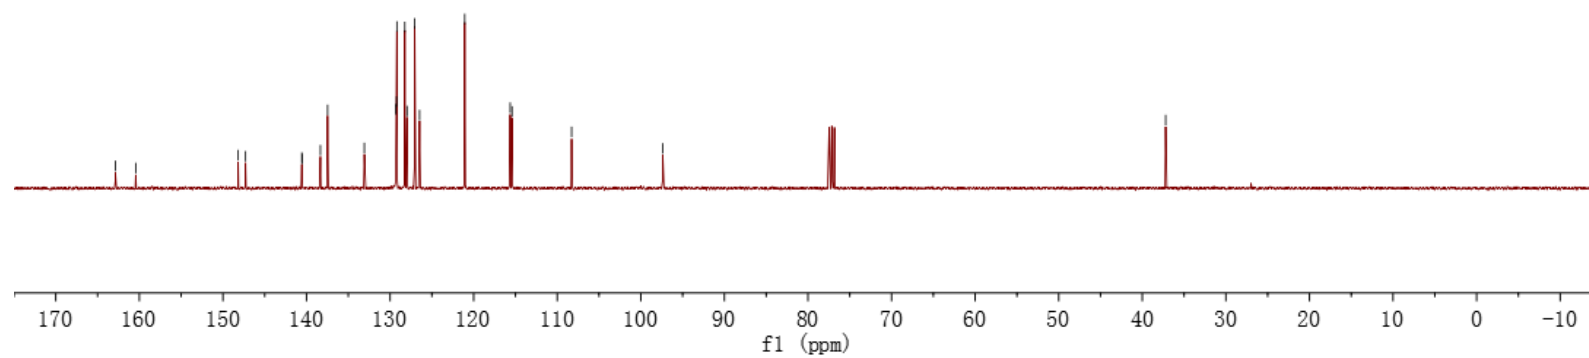

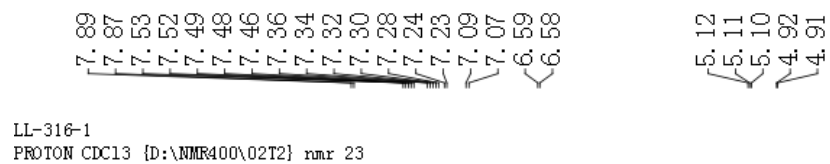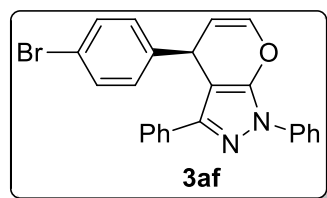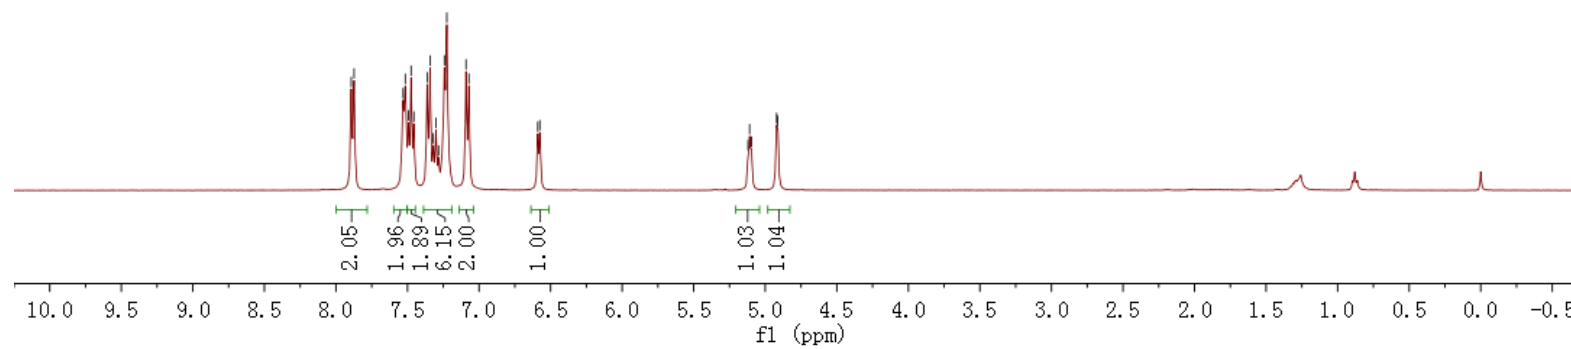

LL-316-1  
C13CPD CDC13 {D:\NMR\400\02T2} nmr 23

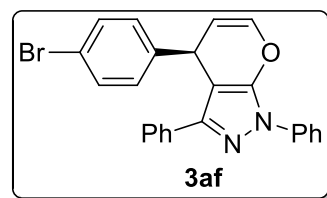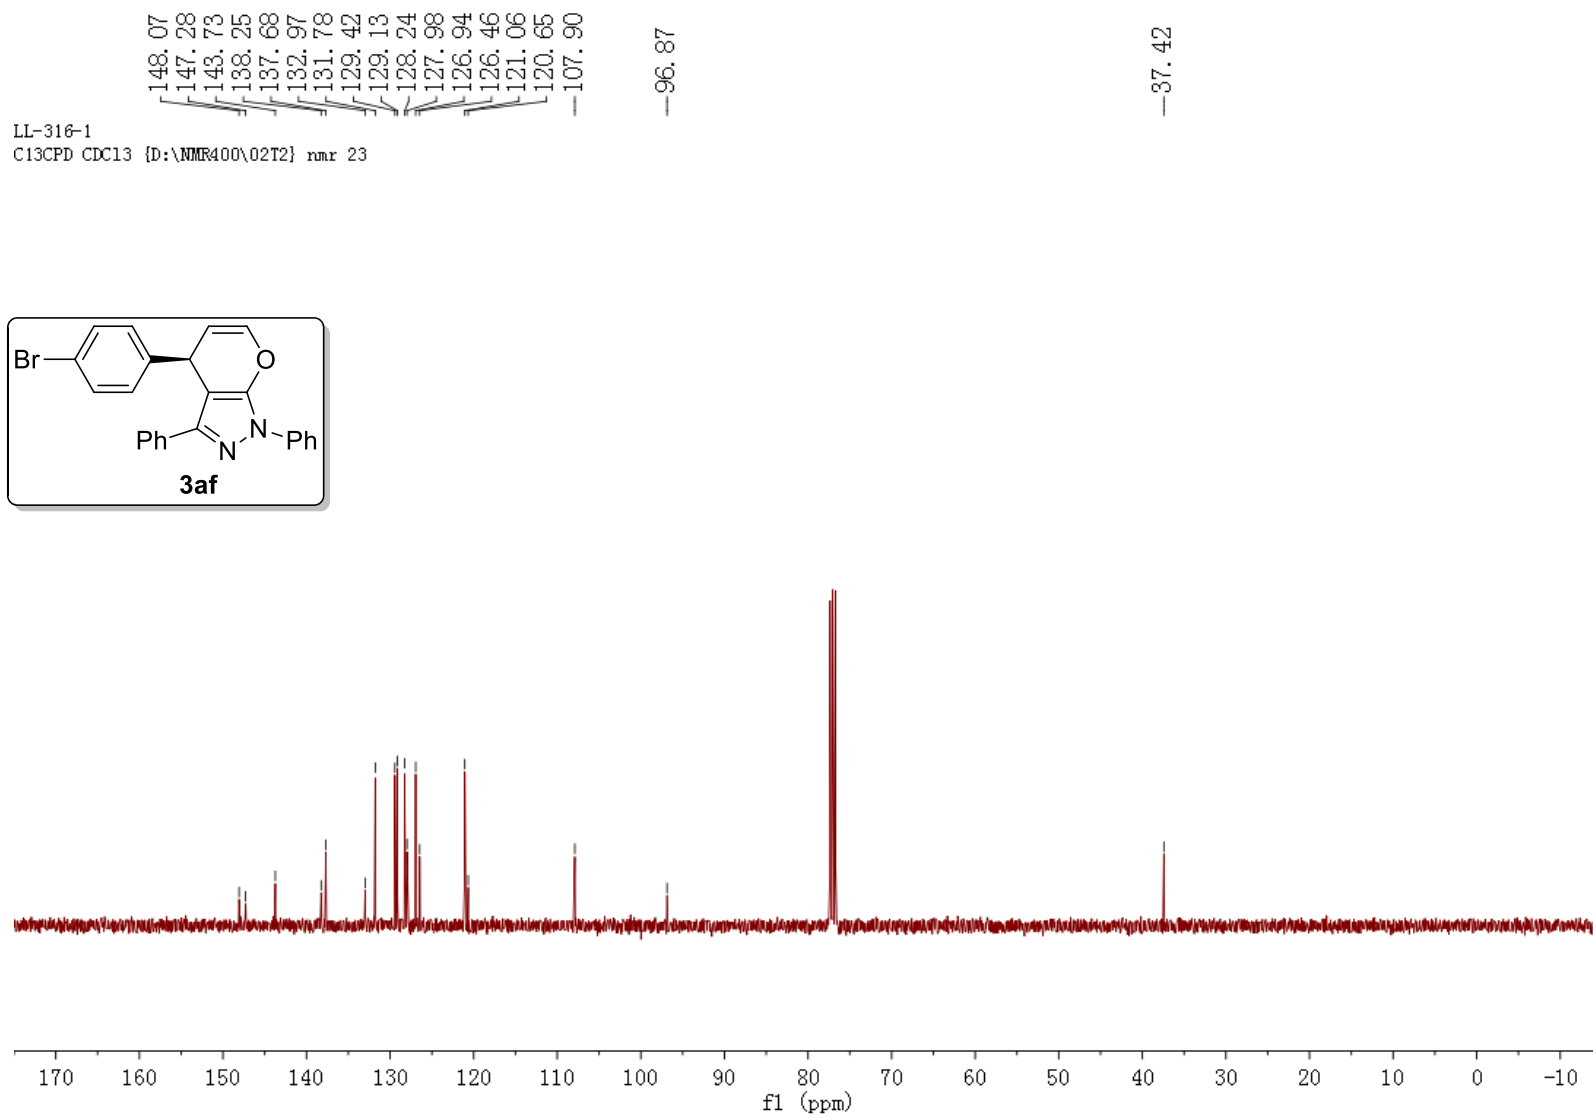

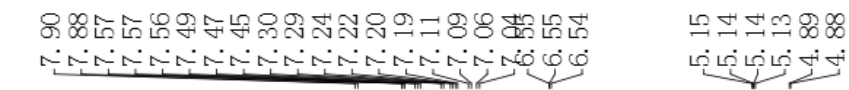

-2.26

LL-212  
PROTON CDC13 {D:\NMR400\0212} nmr 7

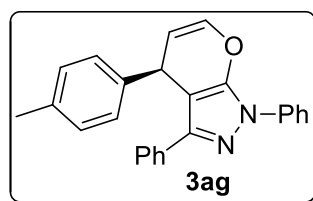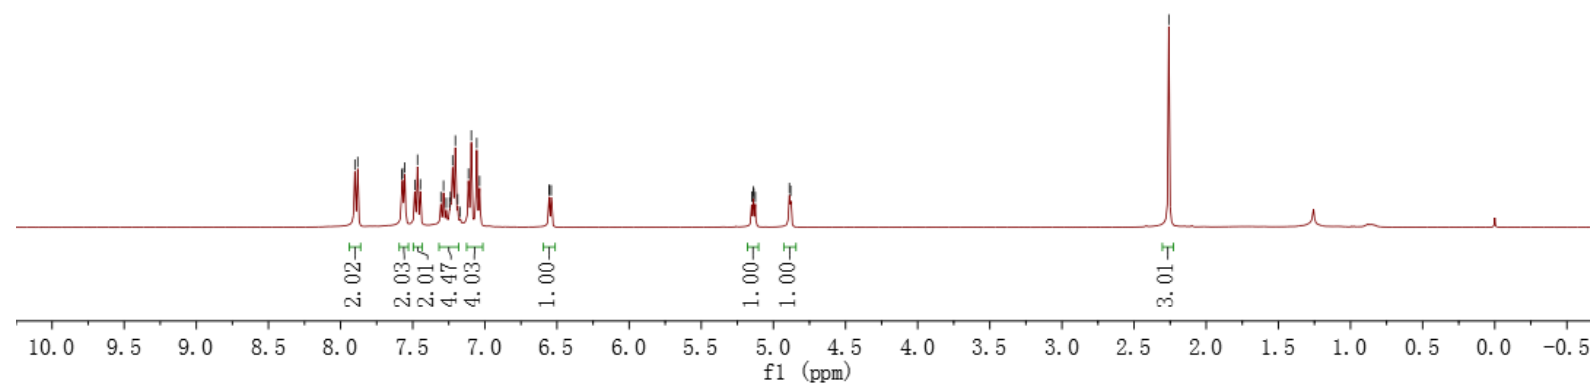



LL-212  
C13CPD CDC13 {D:\NMR400\02T2} nmr 7

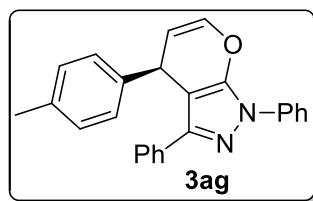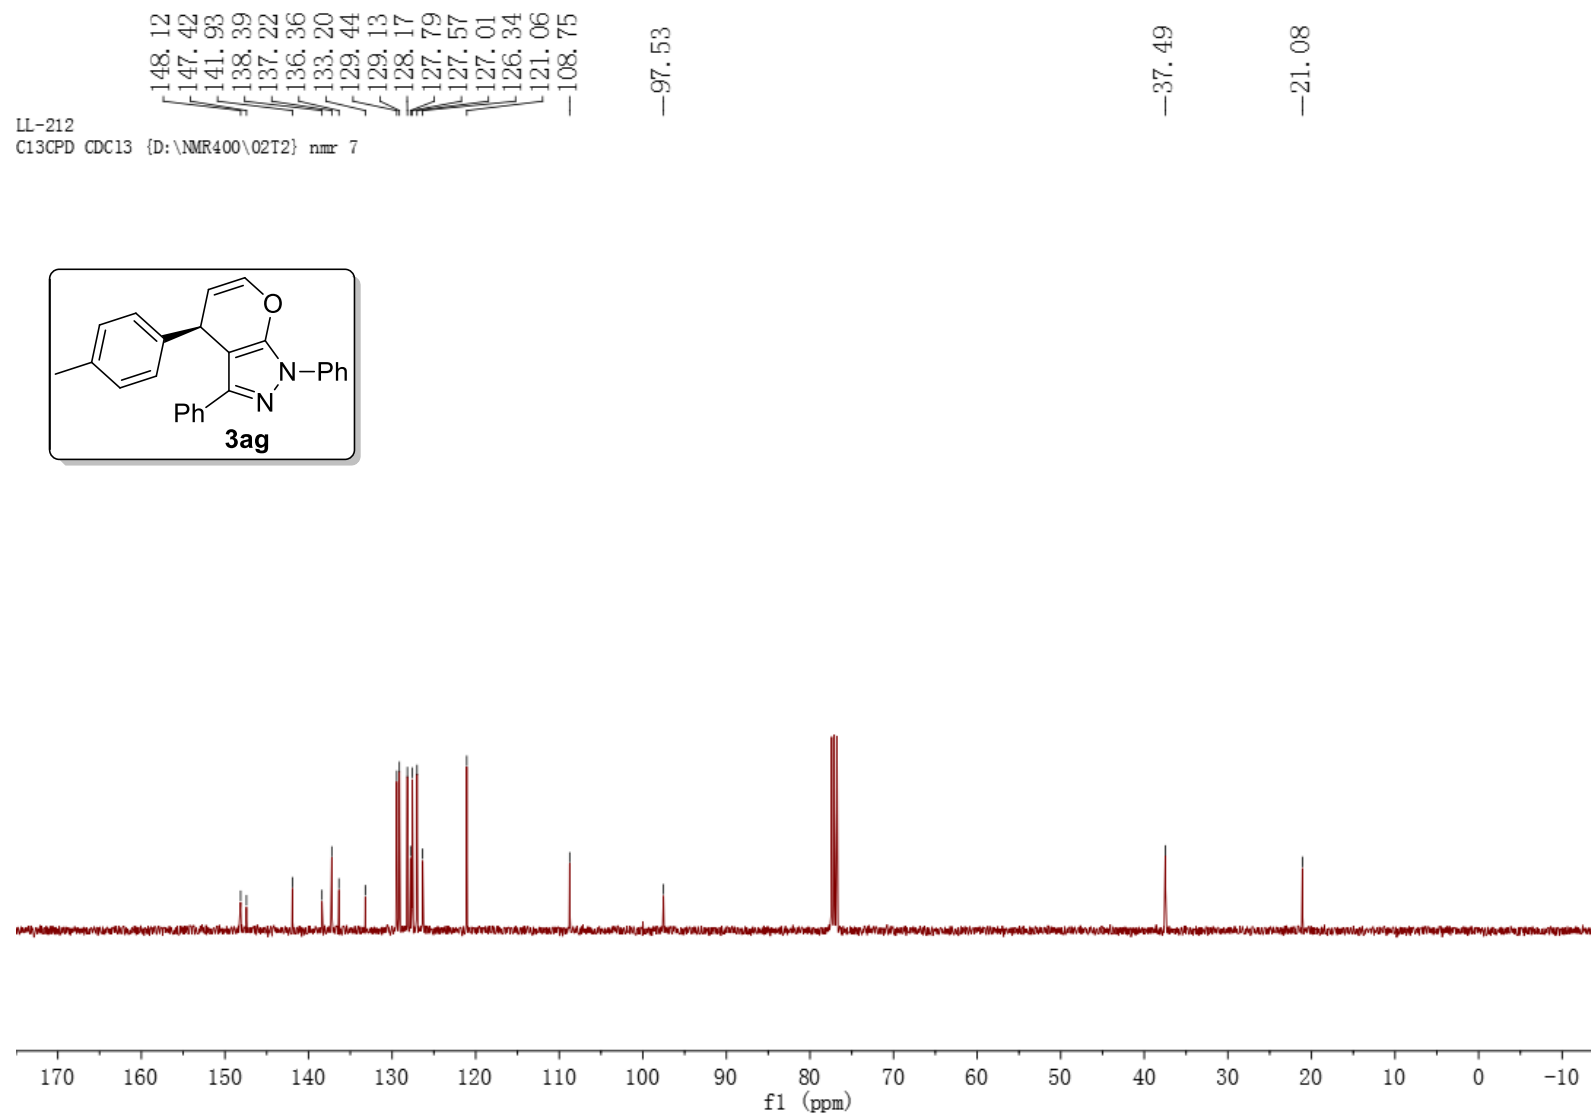

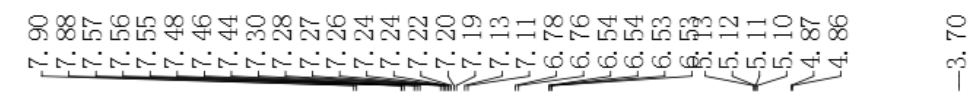

LL-214  
PROTON CDC13 {D:\NMR400\02T2} nmr 10

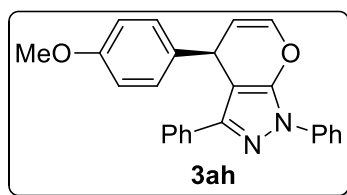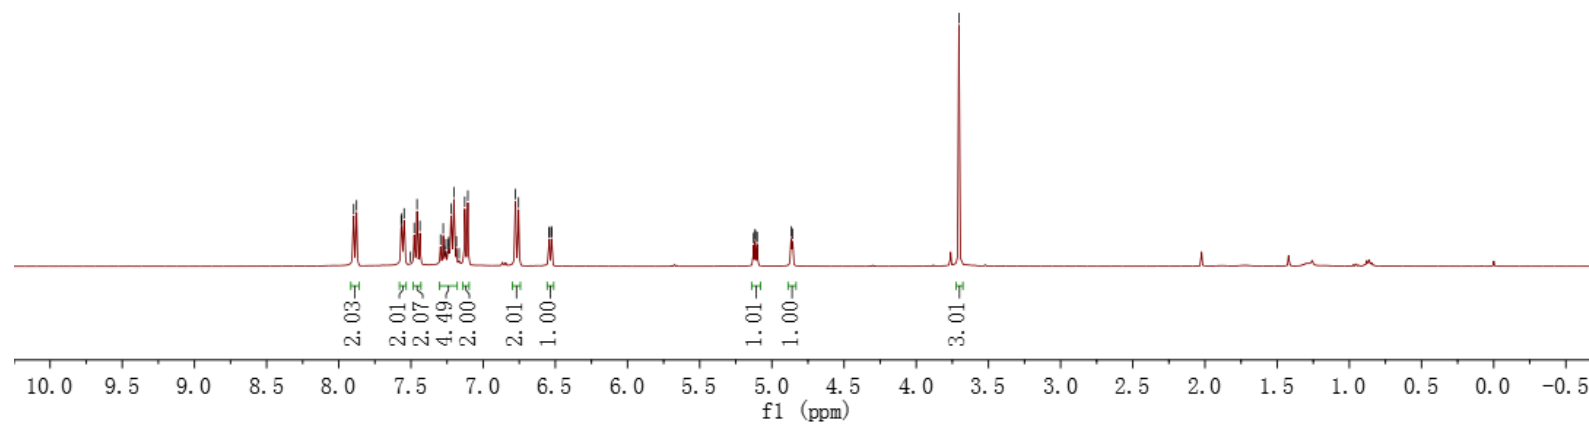

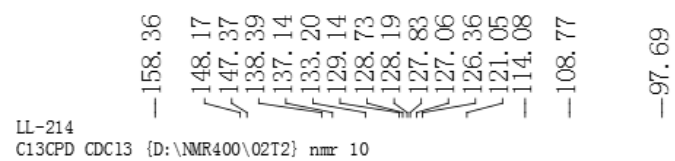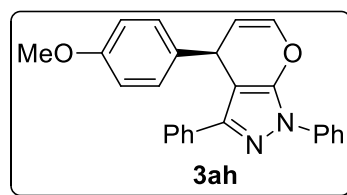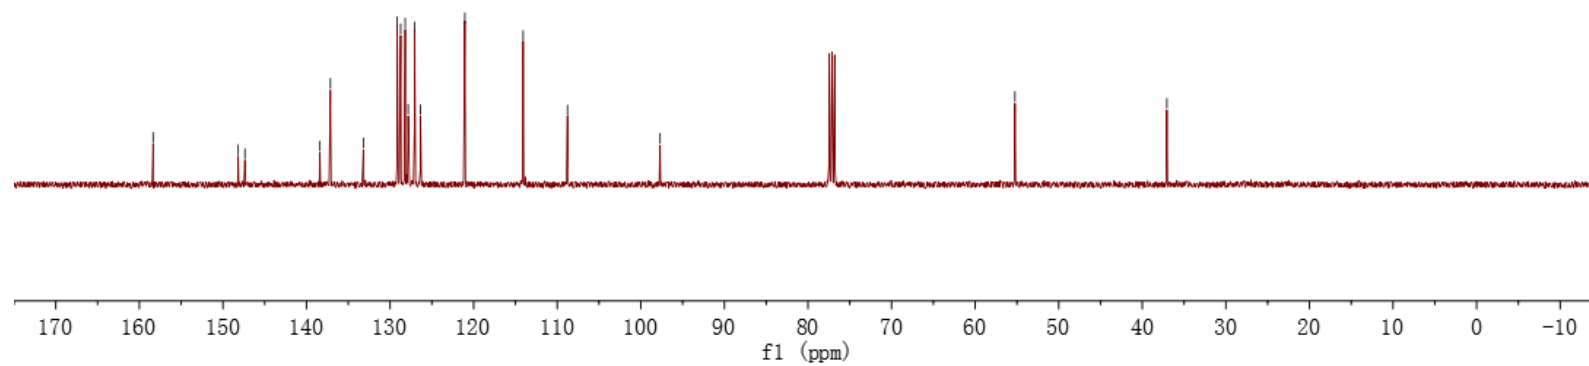

7.90  
7.90  
7.89  
7.88  
7.88  
7.87  
7.52  
7.51  
7.51  
7.50  
7.50  
7.50  
7.48  
7.47  
7.46  
7.46  
7.45  
7.32  
7.32  
7.30  
7.30  
7.29  
7.29  
7.28  
7.25  
7.25  
7.24  
7.24  
7.23  
7.22  
7.21  
7.21  
7.20  
7.20  
6.61  
6.60  
6.59  
6.59  
5.12  
5.11  
5.11  
5.10  
5.02  
5.02  
5.01  
5.01

LL-225  
PROTON CDC13 {D:\NMR400\02T2} nmr 7

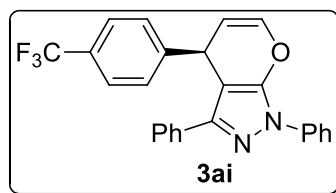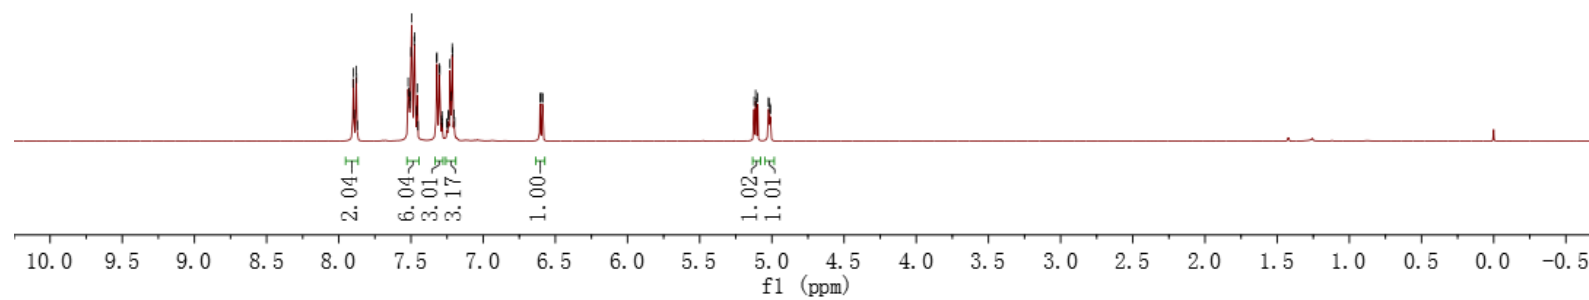

LL-225  
C13CPD CDC13 {D:\NMR400\02T2} nmr 7

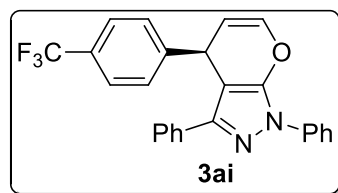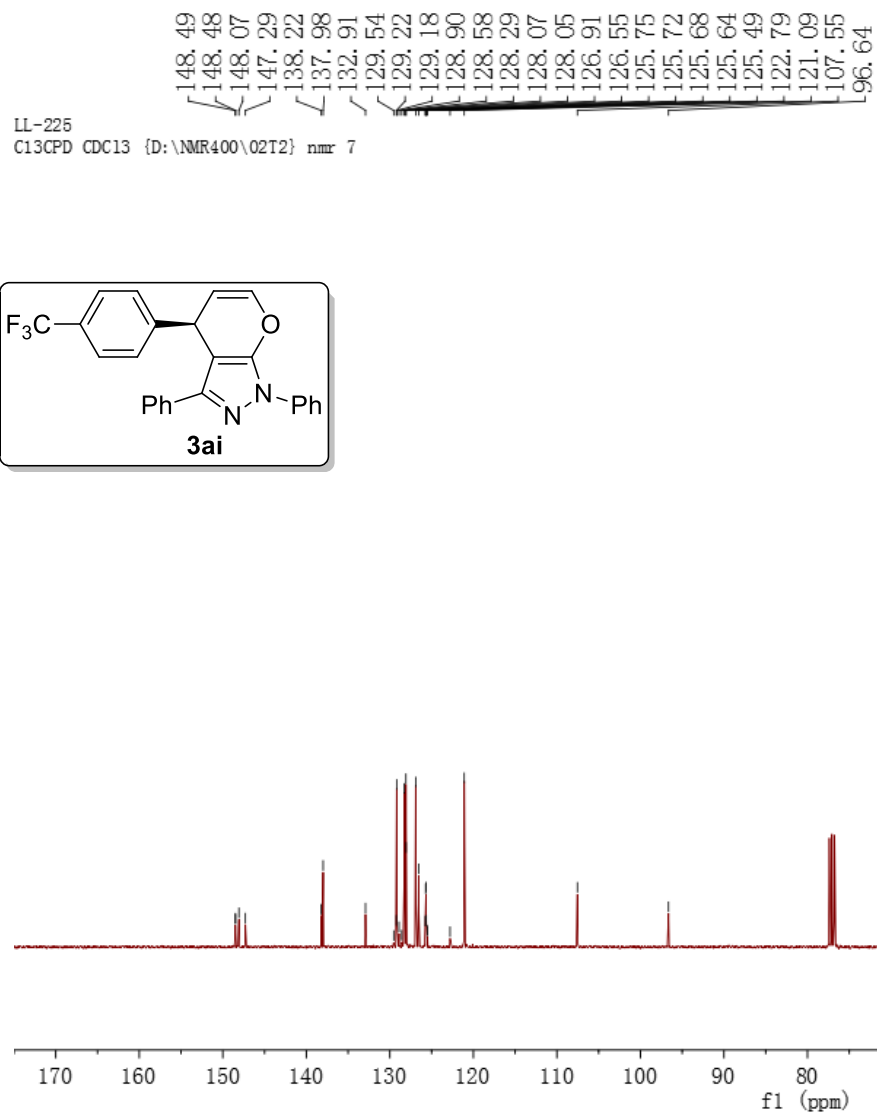

7.94  
7.92  
7.74  
7.73  
7.72  
7.71  
7.69  
7.62  
7.58  
7.57  
7.56  
7.55  
7.49  
7.47  
7.45  
7.41  
7.40  
7.39  
7.38  
7.37  
7.36  
7.36  
7.35  
7.34  
7.34  
7.30  
7.28  
7.26  
7.18  
7.17  
7.16  
7.16  
7.15  
7.13  
7.12  
7.12  
7.11  
6.56  
6.56  
6.54  
6.54  
5.17  
5.16  
5.16  
5.15  
5.07  
5.07  
5.06

LL-232  
PROTON CDC13 {D:\NMR400\0212} nmr 26

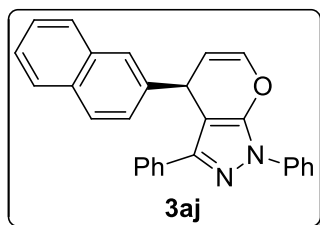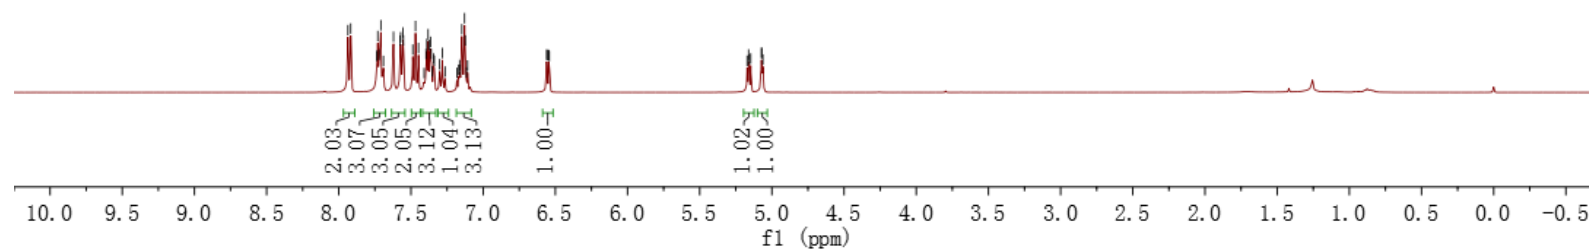

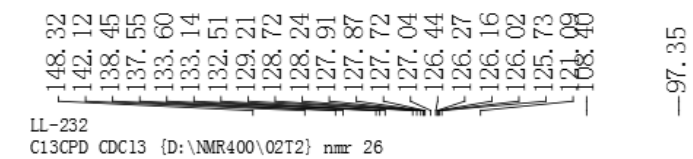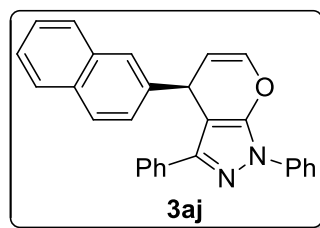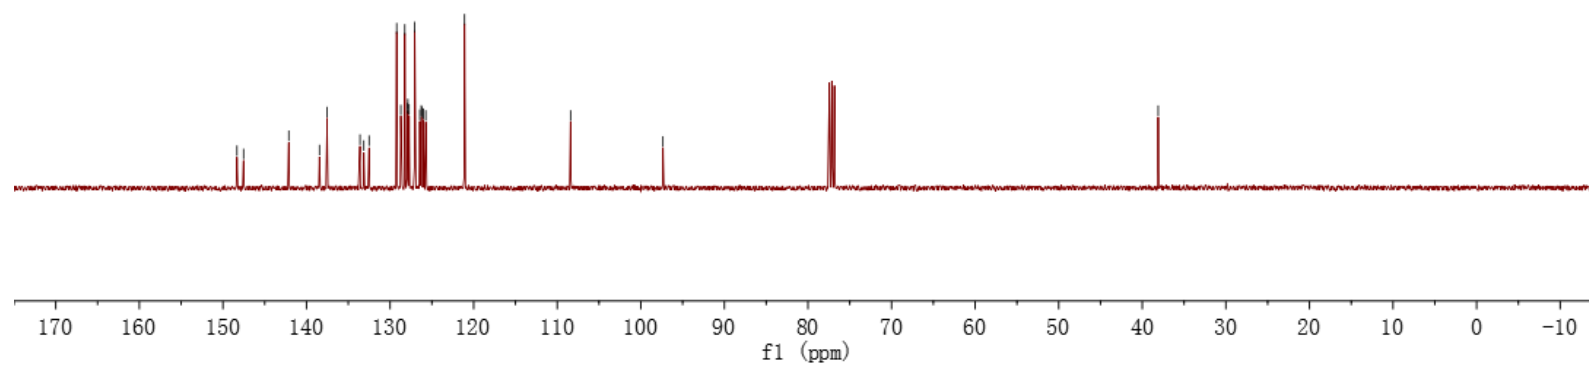

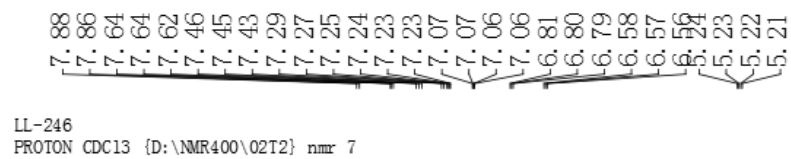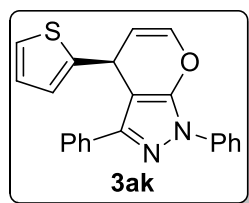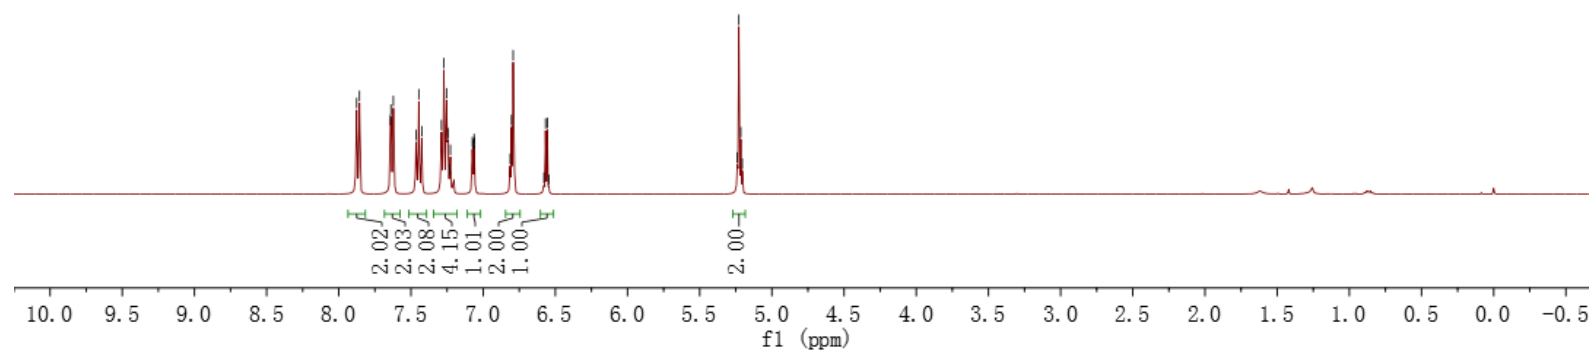



LL-246  
C13CPD CDC13 {D:\NMR400\02T2} nmr 7

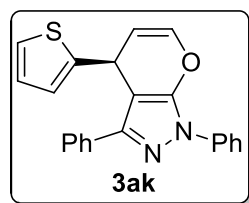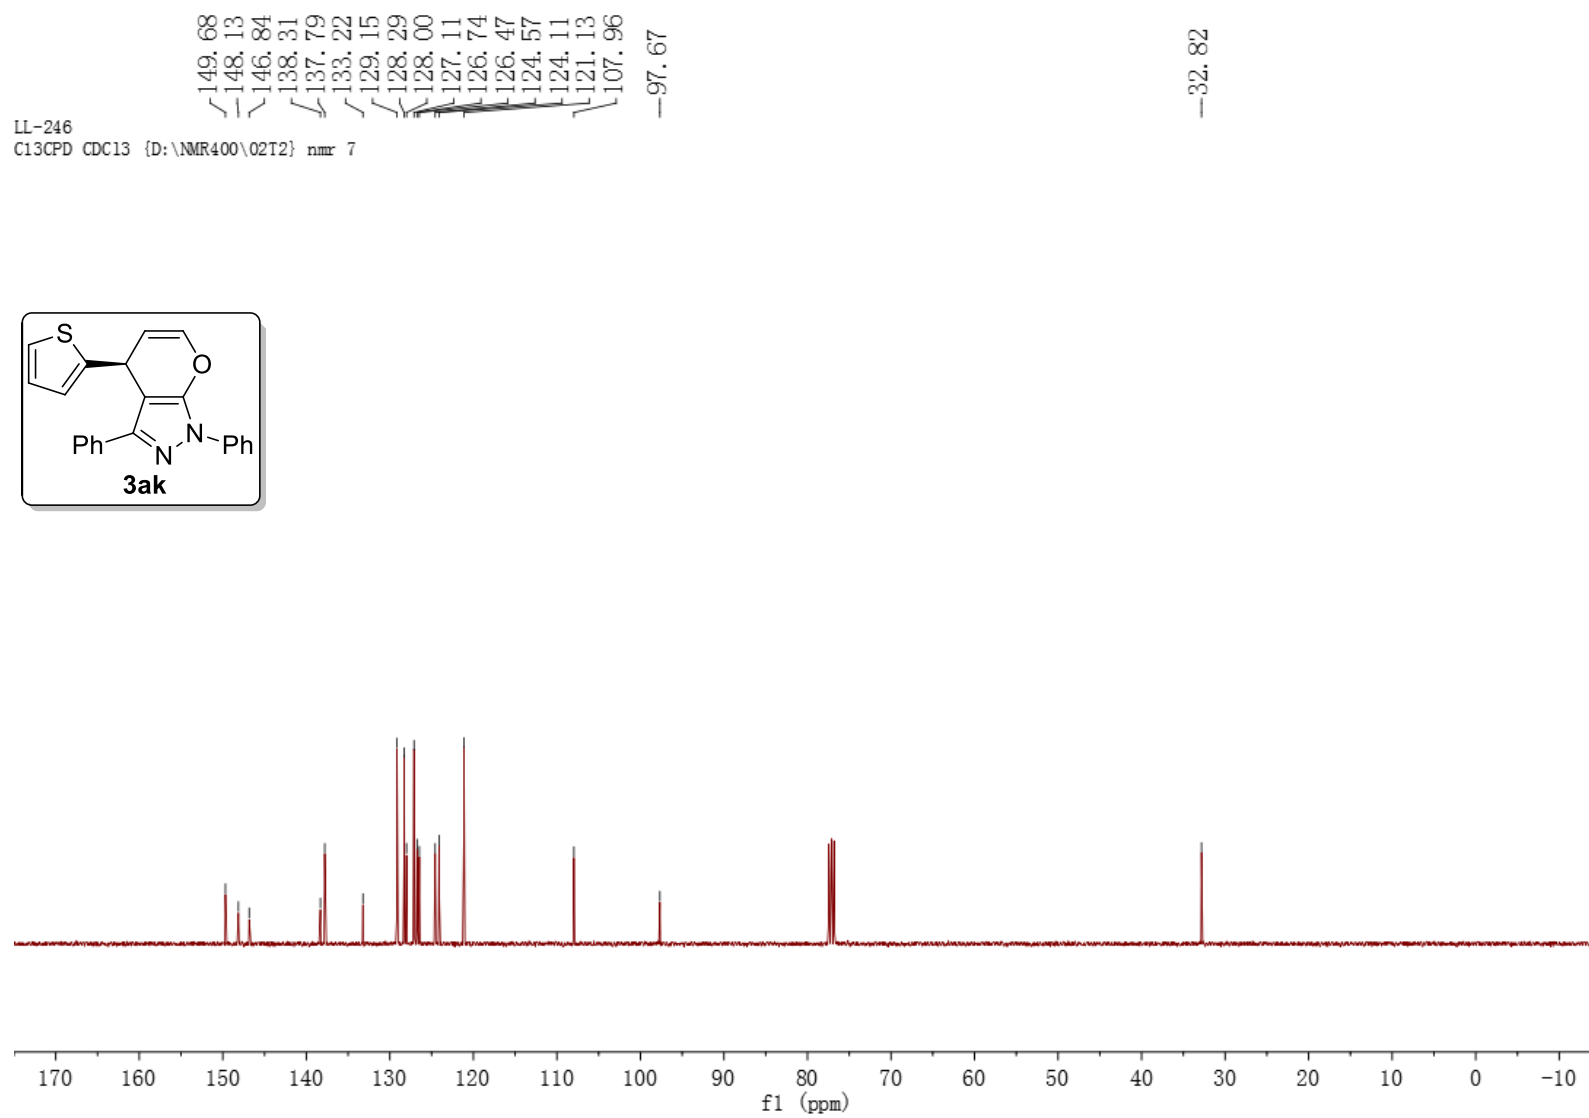

LL-251-1  
 PROTON CDC13 {D:\NMR400\02T2} nmr 13

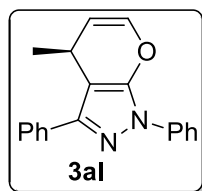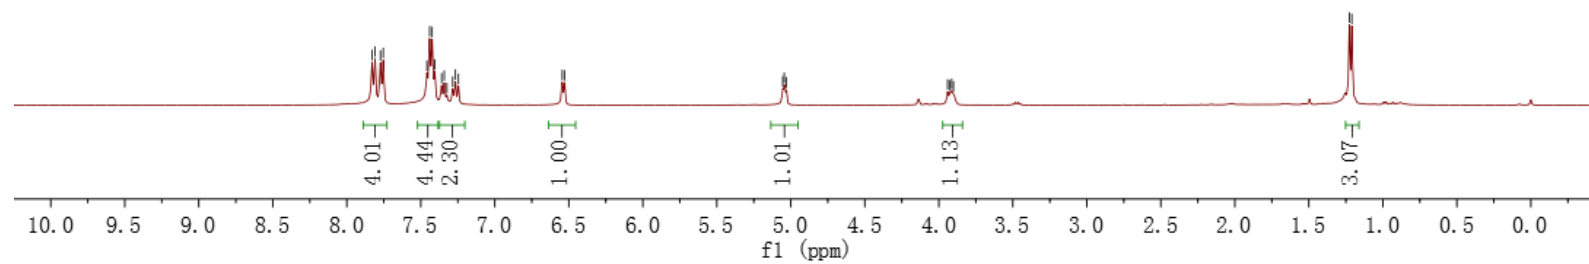

7.83  
 7.81  
 7.77  
 7.75  
 7.46  
 7.44  
 7.42  
 7.41  
 7.36  
 7.34  
 7.32  
 7.28  
 7.27  
 7.25  
 6.54  
 6.53

5.05  
 5.04  
 5.03

3.94  
 3.93  
 3.91  
 3.90

1.23  
 1.21

LL-257  
C13CPD CDC13 {D:\NMR400\02T2} nmr 20

~147.98  
~146.48  
~138.33  
~138.06  
~133.96  
~129.04  
~128.53  
~127.92  
~126.96  
~126.27  
~121.13  
-109.23  
-99.67  
-26.20  
-23.58

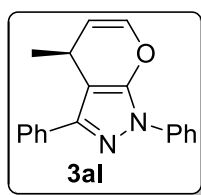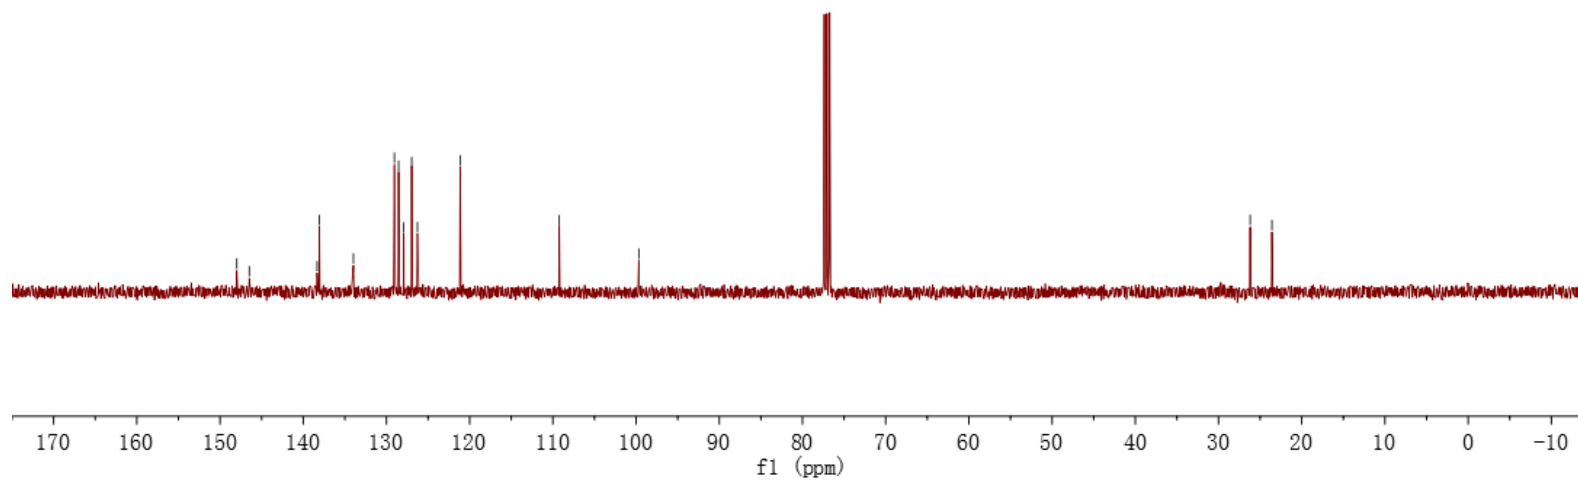

Supplement: c8cc05706k1.pdf [file c8cc05706k1.pdf]
